# Supplementary material for: Early transmissibility assessment of the N501Y mutant strains of SARS-CoV-2 in the United Kingdom, October to November 2020
Source: PubMed Central journal article supplement (PMC7791602; doi:10.2807/1560-7917.es.2020.26.1.2002106), 2021-01-07
Supplement: 20-02106_WU_SupplemetaryMaterial.pdf [file 20-02106_WU_SupplemetaryMaterial.pdf]

This supplementary material is hosted by *Eurosurveillance* as supporting information alongside the article ‘Early transmissibility assessment of the N501Y mutant strains of SARS-CoV-2 in the United Kingdom, October to November 2020’, on behalf of the authors, who remain responsible for the accuracy and appropriateness of the content. The same standards for ethics, copyright, attributions and permissions as for the article apply. Supplements are not edited by *Eurosurveillance* and the journal is not responsible for the maintenance of any links or email addresses provided therein.

## Supplementary Material

### Inference framework to estimate comparative transmissibility

We assumed that the N501Y mutation and  $\Delta 69/\Delta 70$  deletions characterize the three strains 501N, 501Y Variant 1 and 501Y Variant 2, but their differential transmissibility (if any) might be attributable to the combination of N501Y and other mutations including  $\Delta 69/\Delta 70$  deletions acquired in the emergence of 501Y Variant 1 and 2 lineages (Figure 1, Table 1 and Table S1). For conciseness, we used  $N$ ,  $Y1$  and  $Y2$  to denote the three strains. We defined the comparative transmissibility of any two strains as the ratio of their basic reproductive numbers. That is, the comparative transmissibility of strains  $Y1$  and  $Y2$  with respect to strain  $N$  was  $\sigma_{Y1} = R_0^{Y1}/R_0^N$  and  $\sigma_{Y2} = R_0^{Y2}/R_0^N$ , respectively.

We formulated a framework to infer  $\sigma_{Y1}$  and  $\sigma_{Y2}$  under the following base case assumptions: (1) the three strains co-circulated locally during our study period (September 22 to November 16, 2020); (2) non-pharmaceutical interventions (NPIs) had the same effect on all three strains; (3) the probability that an infected person was selected for viral sequencing did not depend on which strain he/she was infected with; (4) recovery from infection with any strain provided protection against reinfection of all strains during our study period; (5) age-specific susceptibility to infection (if any) was the same for all three strains; and (6) after community transmission of strains  $Y1$  and  $Y2$  have been established, the effect of further de novo emergence on their prevalence was negligible.

Under these base case assumptions [8, 9], the next generation matrix (NGM) of infections by strains  $Y1$  and  $Y2$  were  $\sigma_{Y1}$  and  $\sigma_{Y2}$  times that of the strain  $N$ . Let  $\rho_j(t)$  be the proportion of strain  $j$  among all new COVID-19 infections generated at time  $t$ . As the pandemic unfolds,  $\rho_j(t)$  would increase monotonically towards 1 if strain  $j$  had the highest comparative transmissibility. In our previous work [8, 9], we have shown that  $\rho_j(t)$  can be well-approximated using the equation:

$$\rho_j(t) = \frac{\int_0^t \sigma_j g^j(t-a) \rho_j(a) i(a) da}{\sum_{k \in (N, Y1, Y2)} \int_0^t \sigma_k g^k(t-a) \rho_k(a) i(a) da}$$

where  $i(t)$  was the total incidence rate (i.e., including three strains),  $g^j$  was the generation time distribution for strain  $j$ . In the base case, we assumed that all three strains had the same generation time distribution with mean 5.4 days [11]. Let  $Z_d^j$  be the number of SARS-CoV-2 sequences sampled on day  $d$  that was strain  $j$ , and  $\tilde{i}(t)$  be a reliable proxy of the incidence rate  $i(t)$ . We substitute  $i(t)$  with  $\tilde{i}(t)$  and denote the resulting approximation of  $\rho_j(t)$  by  $\tilde{\rho}_j(t)$ . The comparative transmissibility of strains  $Y1$  and  $Y2$  with respect to strain  $N$  (i.e.,  $\sigma_{Y1}$  and  $\sigma_{Y2}$ ) were estimated using the following likelihood function:

$$L(\sigma_{Y1}, \sigma_{Y2}) = \prod_d \left( \frac{(Z_d^N + Z_d^{Y1} + Z_d^{Y2})!}{Z_d^N! Z_d^{Y1}! Z_d^{Y2}!} \prod_{j \in (N, Y1, Y2)} \left( \int_d^{d+1} \tilde{\rho}_j(t) \right)^{Z_d^j} \right)$$

The statistical inference was performed in a Bayesian framework with non-informative (flat) priors using Markov Chain Monte Carlo.

### Discussion about assumptions of the inference framework

Our inference framework is based on the six assumptions described above and its application on the comparative transmissibility of 501N, 501Y Variant 1 and 501Y Variant 2 has several limitations.

First, we assumed the three strains cocirculated locally during the study period (September 22 to November 16, 2020) but our phylogenetic analyses suggest that 501Y Variant 1 and 2 have clear geographical separation in Wales vs England. Our analyses about comparative transmissibility should not be substantially affected because 501N cocirculated with 501Y Variant 1 in Wales and 501N cocirculated with 501Y Variant 2 in England respectively, and the basic reproductive number of 501N should remain the same. However, the effective reproductive number of 501N might be different in Wales and England due to different non-pharmaceutical interventions implemented in different locations (e.g., Tier 1-3 interventions) between September 22 and November 16. Therefore, it is urgent to compare our estimates of  $\sigma_{Y1}$  and  $\sigma_{Y2}$  to observed serial interval and effective reproductive number of 501Y Variant 2 from contact tracing results of cluster of cases.

Second, we assumed the probability that an infected person was selected for sequencing did not depend on which strain he/she was infected with. Given the geographical separation of 501Y Variant 1 and 2 in Wales and England, it is likely that a person infected with 501Y Variant 2 in England had a higher probability to be selected for sequencing because England has a much higher coverage of sequencing pipelines (Figure 2) [3]. Nonetheless, as discussed above, our estimates of comparative transmissibility should not be substantially biased given 501N was used as the comparator.

Third, we assumed recovery from infection with any strain provided protection against reinfection of all strains during our study period, but 501Y Variant 2 carries an unusually large number of mutations

and some of them might link to immunoescape that were first identified in immunocompromised patients, such as  $\Delta 69/\Delta 70$  (Table S1). It is therefore unknown to what extent a person infected by one strain is protected against infection of another strain. Future studies of the individual and combinatorial effects of these mutations to the viral phenotypes are warranted.

Fourth, the currently available data did not allow us to explore whether age-specific susceptibility to infection was the same for the three strains. If the N501Y mutation would increase the binding to human ACE2, it might increase the susceptibility of children to 501Y Variant 2 [16]. Thus, future work from contact tracing or household study is required to clarify the role of N501Y and the associated effects of age-susceptibility.

**Table S1. Potential effects of the changes of amino acids on spike protein of SARS-CoV-2**

| <b>Gene</b> | <b>Changes of amino acids</b> | <b>Potential effects on SARS-CoV-2</b>                                                                                |
|-------------|-------------------------------|-----------------------------------------------------------------------------------------------------------------------|
| Spike       | H69, V70 deletion             | Enhanced infectivity in cell models [17]; Linked to immune escape in immunocompromised patients [18]                  |
|             | N501Y                         | Enhanced binding affinity to human ACE2 [4, 5]; Increased occupancy of the open conformation of the spike protein [6] |
|             | P681H                         | Adjacent to the furin cleavage site which is of biological significance [2]                                           |

**Table S2. Acknowledgement to the contributors of the SARS-CoV-2 sequences used in this study.** We gratefully acknowledge the following Authors from the Originating laboratories responsible for obtaining the specimens, as well as the Submitting laboratories where the genome data (n=7,003) were generated and shared via GISAID, on which this research is based. All Submitters of data may be contacted directly via [www.gisaid.org](http://www.gisaid.org).

| Accession ID   | Originating lab                                                                                     | Submitting lab                                                                                                                                                                            | Authors              |
|----------------|-----------------------------------------------------------------------------------------------------|-------------------------------------------------------------------------------------------------------------------------------------------------------------------------------------------|----------------------|
| EPI_ISL_413485 | Department of microbiology laboratory, Anhui Provincial Center for Disease Control and Prevention   | Department of microbiology laboratory, Anhui Provincial Center for Disease Control and Prevention                                                                                         | Weiwei Li et al      |
| EPI_ISL_407893 | Centre for Infectious Diseases and Microbiology Laboratory Services                                 | NSW Health Pathology - Institute of Clinical Pathology and Medical Research; Westmead Hospital; University of Sydney                                                                      | Eden J-S et al       |
| EPI_ISL_408976 | Centre for Infectious Diseases and Microbiology Laboratory Services                                 | NSW Health Pathology - Institute of Clinical Pathology and Medical Research; Westmead Hospital; University of Sydney                                                                      | Rockett R et al      |
| EPI_ISL_408977 | Serology, Virology and OTDS Laboratories (SAVID), NSW Health Pathology Randwick                     | NSW Health Pathology - Institute of Clinical Pathology and Medical Research; Centre for Infectious Diseases and Microbiology Laboratory Services; Westmead Hospital; University of Sydney | Eden J-S et al       |
| EPI_ISL_412975 | Centre for Infectious Diseases and Microbiology Laboratory Services                                 | NSW Health Pathology - Institute of Clinical Pathology and Medical Research; Westmead Hospital; University of Sydney                                                                      | Eden J-S et al       |
| EPI_ISL_413213 | Centre for Infectious Diseases and Microbiology Laboratory Services                                 | NSW Health Pathology - Institute of Clinical Pathology and Medical Research; Westmead Hospital; University of Sydney                                                                      | Eden J-S et al       |
| EPI_ISL_413214 | Centre for Infectious Diseases and Microbiology Laboratory Services                                 | NSW Health Pathology - Institute of Clinical Pathology and Medical Research; Westmead Hospital; University of Sydney                                                                      | Eden J-S et al       |
| EPI_ISL_413594 | Centre for Infectious Diseases and Microbiology Laboratory Services                                 | NSW Health Pathology - Institute of Clinical Pathology and Medical Research; Westmead Hospital; University of Sydney                                                                      | Rockett R et al      |
| EPI_ISL_413595 | Centre for Infectious Diseases and Microbiology Laboratory Services                                 | NSW Health Pathology - Institute of Clinical Pathology and Medical Research; Westmead Hospital; University of Sydney                                                                      | Rockett R et al      |
| EPI_ISL_413596 | Centre for Infectious Diseases and Microbiology - Public Health                                     | NSW Health Pathology - Institute of Clinical Pathology and Medical Research; Westmead Hospital; University of Sydney                                                                      | Rockett R et al      |
| EPI_ISL_413597 | Centre for Infectious Diseases and Microbiology- Public Health                                      | NSW Health Pathology - Institute of Clinical Pathology and Medical Research; Westmead Hospital; University of Sydney                                                                      | Lam C et al          |
| EPI_ISL_593742 | South Eastern Area Laboratory Services (SEALS)                                                      | NSW Health Pathology - Institute of Clinical Pathology and Medical Research; Westmead Hospital; University of Sydney                                                                      | CIDM-PH et al. et al |
| EPI_ISL_667799 | South Eastern Area Laboratory Services (SEALS)                                                      | NSW Health Pathology - Institute of Clinical Pathology and Medical Research; Westmead Hospital; University of Sydney                                                                      | CIDM-PH et al. et al |
| EPI_ISL_413598 | Centre for Infectious Diseases and Microbiology - Public Health                                     | NSW Health Pathology - Institute of Clinical Pathology and Medical Research; Westmead Hospital; University of Sydney                                                                      | Gray K et al         |
| EPI_ISL_413599 | Centre for Infectious Diseases and Microbiology - Public Health                                     | NSW Health Pathology - Institute of Clinical Pathology and Medical Research; Westmead Hospital; University of Sydney                                                                      | Timms et al          |
| EPI_ISL_413600 | Centre for Infectious Diseases and Microbiology - Public Health                                     | NSW Health Pathology - Institute of Clinical Pathology and Medical Research; Westmead Hospital; University of Sydney                                                                      | Gall et al           |
| EPI_ISL_678386 | Area of Virology, Serology and Virology Division (SAVID), New South Wales Health Pathology Randwick | Virology Research Laboratory; Area of Virology, Serology and Virology Division (SAVID), New South Wales Health Pathology Randwick                                                         | Foster et al         |
| EPI_ISL_490023 | South Eastern Area Laboratory Services (SEALS)                                                      | NSW Health Pathology - Institute of Clinical Pathology and Medical Research; Westmead Hospital; University of Sydney                                                                      | CIDM-PH et al. et al |
| EPI_ISL_407894 | Pathology Queensland                                                                                | Public Health Virology Laboratory                                                                                                                                                         | Ben Huang et al      |
| EPI_ISL_407896 | Pathology Queensland                                                                                | Public Health Virology Laboratory                                                                                                                                                         | Ben Huang et al      |
| EPI_ISL_410717 | Pathology Queensland                                                                                | Public Health Virology Laboratory                                                                                                                                                         | Ben Huang et al      |
| EPI_ISL_410718 | Pathology Queensland                                                                                | Public Health Virology Laboratory                                                                                                                                                         | Ben Huang et al      |
| EPI_ISL_414414 | Pathology Queensland                                                                                | Public Health Virology Laboratory                                                                                                                                                         | Bixing Huang et al   |
| EPI_ISL_602577 | SA Pathology                                                                                        | SA Pathology                                                                                                                                                                              | Lex Leong et al      |
| EPI_ISL_603123 | SA Pathology                                                                                        | SA Pathology                                                                                                                                                                              | Lex Leong et al      |
| EPI_ISL_406844 | Monash Medical Centre                                                                               | Collaboration between the University of Melbourne at The Peter Doherty Institute for Infection and Immunity, and the Victorian Infectious Disease Reference Laboratory                    | Caly et al           |
| EPI_ISL_416410 | Victorian Infectious Diseases Reference Laboratory (VIDRL)                                          | Victorian Infectious Diseases Reference Laboratory and Microbiological Diagnostic Unit Public Health Laboratory, Doherty Institute                                                        | Caly L. et al        |



|                |                                                                                                |                                                                                                |                                     |
|----------------|------------------------------------------------------------------------------------------------|------------------------------------------------------------------------------------------------|-------------------------------------|
| EPI_ISL_522200 | Microbiological Diagnostic Unit - Public Health Laboratory (MDU-PHL)                           | MDU-PHL                                                                                        | Seemann T. et al                    |
| EPI_ISL_521456 | Microbiological Diagnostic Unit - Public Health Laboratory (MDU-PHL)                           | MDU-PHL                                                                                        | Seemann T. et al                    |
| EPI_ISL_521490 | Victorian Infectious Diseases Reference Laboratory (VIDRL)                                     | VIDRL and MDU-PHL                                                                              | Caly L. et al                       |
| EPI_ISL_521515 | Victorian Infectious Diseases Reference Laboratory (VIDRL)                                     | VIDRL and MDU-PHL                                                                              | Caly L. et al                       |
| EPI_ISL_521516 | Victorian Infectious Diseases Reference Laboratory (VIDRL)                                     | VIDRL and MDU-PHL                                                                              | Caly L. et al                       |
| EPI_ISL_520749 | Victorian Infectious Diseases Reference Laboratory (VIDRL)                                     | VIDRL and MDU-PHL                                                                              | Caly L. et al                       |
| EPI_ISL_520391 | Victorian Infectious Diseases Reference Laboratory (VIDRL)                                     | VIDRL and MDU-PHL                                                                              | Caly L. et al                       |
| EPI_ISL_519331 | Victorian Infectious Diseases Reference Laboratory (VIDRL)                                     | VIDRL and MDU-PHL                                                                              | Caly L. et al                       |
| EPI_ISL_519332 | Victorian Infectious Diseases Reference Laboratory (VIDRL)                                     | VIDRL and MDU-PHL                                                                              | Caly L. et al                       |
| EPI_ISL_413518 | Infectious Disease Control Center, Center for Disease Control and Prevention of PLA            | Infectious Disease Control Center, Center for Disease Control and Prevention of PLA            | Li et al                            |
| EPI_ISL_413519 | Infectious Disease Control Center, Center for Disease Control and Prevention of PLA            | Infectious Disease Control Center, Center for Disease Control and Prevention of PLA            | Li et al                            |
| EPI_ISL_413520 | Infectious Disease Control Center, Center for Disease Control and Prevention of PLA            | Infectious Disease Control Center, Center for Disease Control and Prevention of PLA            | Li et al                            |
| EPI_ISL_413521 | Infectious Disease Control Center, Center for Disease Control and Prevention of PLA            | Infectious Disease Control Center, Center for Disease Control and Prevention of PLA            | Li et al                            |
| EPI_ISL_411957 | Key Laboratory of Human Diseases, Comparative Medicine, Institute of Laboratory Animal Science | Key Laboratory of Human Diseases, Comparative Medicine, Institute of Laboratory Animal Science | Linlin et al                        |
| EPI_ISL_415159 | KU Leuven, Clinical and Epidemiological Virology                                               | KU Leuven, Clinical and Epidemiological Virology                                               | Bert Vanmechelen et al              |
| EPI_ISL_415157 | KU Leuven, Clinical and Epidemiological Virology                                               | KU Leuven, Clinical and Epidemiological Virology                                               | Bert Vanmechelen et al              |
| EPI_ISL_415154 | KU Leuven, Clinical and Epidemiological Virology                                               | KU Leuven, Clinical and Epidemiological Virology                                               | Bert Vanmechelen et al              |
| EPI_ISL_407976 | KU Leuven, Clinical and Epidemiological Virology                                               | KU Leuven, Clinical and Epidemiological Virology                                               | Bert Vanmechelen et al              |
| EPI_ISL_415158 | KU Leuven, Clinical and Epidemiological Virology                                               | KU Leuven, Clinical and Epidemiological Virology                                               | Bert Vanmechelen et al              |
| EPI_ISL_415156 | KU Leuven, Clinical and Epidemiological Virology                                               | KU Leuven, Clinical and Epidemiological Virology                                               | Bert Vanmechelen et al              |
| EPI_ISL_415155 | KU Leuven, Clinical and Epidemiological Virology                                               | KU Leuven, Clinical and Epidemiological Virology                                               | Bert Vanmechelen et al              |
| EPI_ISL_415153 | KU Leuven, Clinical and Epidemiological Virology                                               | KU Leuven, Clinical and Epidemiological Virology                                               | Bert Vanmechelen et al              |
| EPI_ISL_415105 | Laboratório Central de Saúde Pública Professor Gonçalo Moniz – LACEN/BA                        | Instituto Oswaldo Cruz FIOCRUZ - Laboratory of Respiratory Viruses and Measles (LVRS)          | Paola Resende et al                 |
| EPI_ISL_415128 | LACEN/ES - Laboratório Central de Saúde Pública do Espírito Santo                              | Instituto Oswaldo Cruz FIOCRUZ - Laboratory of Respiratory Viruses and Measles (LVRS)          | Paola Resende et al                 |
| EPI_ISL_500467 | LACEN/PE                                                                                       | WallauLab, Aggeu Magalhaes Institute                                                           | Marcelo Henrique Santos Paiva et al |
| EPI_ISL_414045 | LACEN RJ - Laboratório Central de Saúde Pública Noel Nutels                                    | Instituto Oswaldo Cruz FIOCRUZ - Laboratory of Respiratory Viruses and Measles (LVRS)          | Paola Resende et al                 |
| EPI_ISL_412964 | Hospital Israelita Albert Einstein                                                             | Instituto Adolfo Lutz Interdisciplinary Procedures Center Strategic Laboratory                 | Jaqueline Goes de Jesus et al       |
| EPI_ISL_413016 | Hospital Israelita Albert Einstein                                                             | Instituto Adolfo Lutz, Interdisciplinary Procedures Center, Strategic Laboratory               | Jaqueline Goes de Jesus et al       |
| EPI_ISL_414014 | Hospital Israelita Albert Einstein                                                             | Instituto Adolfo Lutz, Interdisciplinary Procedures Center, Strategic Laboratory               | Claudio Tavares Sacchi et al        |
| EPI_ISL_414017 | Hospital São Joaquim Beneficencia Portuguesa                                                   | Instituto Adolfo Lutz, Interdisciplinary Procedures Center, Strategic Laboratory               | Claudio Tavares Sacchi et al        |
| EPI_ISL_414016 | Hospital São Joaquim Beneficencia Portuguesa                                                   | Instituto Adolfo Lutz, Interdisciplinary Procedures Center, Strategic Laboratory               | Claudio Tavares Sacchi et al        |
| EPI_ISL_414015 | Hospital São Joaquim Beneficencia Portuguesa                                                   | Instituto Adolfo Lutz, Interdisciplinary Procedures Center, Strategic Laboratory               | Claudio Tavares Sacchi et al        |
| EPI_ISL_416028 | National Influenza Center - Instituto Adolfo Lutz                                              | Instituto Adolfo Lutz, Interdisciplinary Procedures Center, Strategic Laboratory               | Claudio Tavares Sacchi et al        |
| EPI_ISL_416029 | Laboratório Fleury                                                                             | Instituto Adolfo Lutz, Interdisciplinary Procedures Center, Strategic Laboratory               | Claudio Tavares Sacchi et al        |
| EPI_ISL_416031 | National Influenza Center - Instituto Adolfo Lutz                                              | Instituto Adolfo Lutz, Interdisciplinary Procedures Center, Strategic Laboratory               | Claudio Tavares Sacchi et al        |

|                |                                                                            |                                                                                                                                                                                                                                                            |                              |
|----------------|----------------------------------------------------------------------------|------------------------------------------------------------------------------------------------------------------------------------------------------------------------------------------------------------------------------------------------------------|------------------------------|
| EPI_ISL_416032 | National Influenza Center - Instituto Adolfo Lutz                          | Instituto Adolfo Lutz, Interdisciplinary Procedures Center, Strategic Laboratory                                                                                                                                                                           | Claudio Tavares Sacchi et al |
| EPI_ISL_416033 | Hospital Israelita Albert Einstein                                         | Instituto Adolfo Lutz, Interdisciplinary Procedures Center, Strategic Laboratory                                                                                                                                                                           | Claudio Tavares Sacchi et al |
| EPI_ISL_416034 | Hospital Israelita Albert Einstein                                         | Instituto Adolfo Lutz, Interdisciplinary Procedures Center, Strategic Laboratory                                                                                                                                                                           | Claudio Tavares Sacchi et al |
| EPI_ISL_416035 | National Influenza Center - Instituto Adolfo Lutz                          | Instituto Adolfo Lutz, Interdisciplinary Procedures Center, Strategic Laboratory                                                                                                                                                                           | Claudio Tavares Sacchi et al |
| EPI_ISL_416036 | National Influenza Center - Instituto Adolfo Lutz                          | Instituto Adolfo Lutz, Interdisciplinary Procedures Center, Strategic Laboratory                                                                                                                                                                           | Claudio Tavares Sacchi et al |
| EPI_ISL_660490 | Laboratoire de Microbiologie CHU Sourou Sanou                              | Centre Muraz                                                                                                                                                                                                                                               | Abdoul-Salam Ouedraogo et al |
| EPI_ISL_660491 | Laboratoire de Microbiologie CHU Sourou Sanou                              | Centre Muraz                                                                                                                                                                                                                                               | Abdoul-Salam Ouedraogo et al |
| EPI_ISL_411902 | Virology Unit, Institut Pasteur du Cambodge.                               | Virology Unit, Institut Pasteur du Cambodge (Sequencing done by: Jessica E Manning/Jennifer A Bohl at Malaria and Vector Research Research Laboratory, National Institute of Allergy and Infectious Diseases and Vida Ah Yong from Chan-Zuckerberg Biohub) | Erik A Karlsson et al        |
| EPI_ISL_415581 | BCCDC Public Health Laboratory                                             | BCCDC Public Health Laboratory                                                                                                                                                                                                                             | Harrigan et al               |
| EPI_ISL_415578 | BCCDC Public Health Laboratory                                             | BCCDC Public Health Laboratory                                                                                                                                                                                                                             | Harrigan et al               |
| EPI_ISL_415580 | BCCDC Public Health Laboratory                                             | BCCDC Public Health Laboratory                                                                                                                                                                                                                             | Harrigan et al               |
| EPI_ISL_415579 | BCCDC Public Health Laboratory                                             | BCCDC Public Health Laboratory                                                                                                                                                                                                                             | Harrigan et al               |
| EPI_ISL_415582 | BCCDC Public Health Laboratory                                             | BCCDC Public Health Laboratory                                                                                                                                                                                                                             | Harrigan et al               |
| EPI_ISL_412965 | BCCDC Public Health Laboratory                                             | BCCDC Public Health Laboratory                                                                                                                                                                                                                             | Harrigan et al               |
| EPI_ISL_415583 | BCCDC Public Health Laboratory                                             | BCCDC Public Health Laboratory                                                                                                                                                                                                                             | Harrigan et al               |
| EPI_ISL_415584 | BCCDC Public Health Laboratory                                             | BCCDC Public Health Laboratory                                                                                                                                                                                                                             | Harrigan et al               |
| EPI_ISL_415586 | BCCDC Public Health Laboratory                                             | BCCDC Public Health Laboratory                                                                                                                                                                                                                             | Harrigan et al               |
| EPI_ISL_415585 | BCCDC Public Health Laboratory                                             | BCCDC Public Health Laboratory                                                                                                                                                                                                                             | Harrigan et al               |
| EPI_ISL_415587 | BCCDC Public Health Laboratory                                             | BCCDC Public Health Laboratory                                                                                                                                                                                                                             | Harrigan et al               |
| EPI_ISL_415577 | BCCDC Public Health Laboratory                                             | BCCDC Public Health Laboratory                                                                                                                                                                                                                             | Harrigan et al               |
| EPI_ISL_415590 | BCCDC Public Health Laboratory                                             | BCCDC Public Health Laboratory                                                                                                                                                                                                                             | Harrigan et al               |
| EPI_ISL_415588 | BCCDC Public Health Laboratory                                             | BCCDC Public Health Laboratory                                                                                                                                                                                                                             | Harrigan et al               |
| EPI_ISL_415589 | BCCDC Public Health Laboratory                                             | BCCDC Public Health Laboratory                                                                                                                                                                                                                             | Harrigan et al               |
| EPI_ISL_413014 | Public Health Ontario Laboratory                                           | Ontario Agency for Health Protection and Promotion (OHPP)                                                                                                                                                                                                  | Alireza Eshaghi et al        |
| EPI_ISL_609825 | Unity Health Toronto                                                       | Ontario Institute for Cancer Research                                                                                                                                                                                                                      | Ramzi Fattouh et al          |
| EPI_ISL_413015 | Public Health Ontario Laboratory                                           | National Microbiology Laboratory                                                                                                                                                                                                                           | Shari Tyson et al            |
| EPI_ISL_414577 | Hospital de Talca, Chile                                                   | Instituto de Salud Publica de Chile                                                                                                                                                                                                                        | Andrés E. Castillo et al     |
| EPI_ISL_414578 | Hospital de Talca, Chile                                                   | Instituto de Salud Publica de Chile                                                                                                                                                                                                                        | Andrés E. Castillo et al     |
| EPI_ISL_414579 | Clinica Alemana de Santiago, Chile                                         | Instituto de Salud Publica de Chile                                                                                                                                                                                                                        | Andrés E. Castillo et al     |
| EPI_ISL_414580 | Clinica Santa Maria, Santiago, Chile                                       | Instituto de Salud Publica de Chile                                                                                                                                                                                                                        | Andrés E. Castillo et al     |
| EPI_ISL_415658 | Laboratory of Molecular Virology, Pontificia Universidad Católica de Chile | MSHS Pathogen Surveillance Program                                                                                                                                                                                                                         | Rafael A. Medina et al       |
| EPI_ISL_415660 | Laboratory of Molecular Virology, Pontificia Universidad Católica de Chile | MSHS Pathogen Surveillance Program                                                                                                                                                                                                                         | Rafael A. Medina et al       |
| EPI_ISL_415661 | Laboratory of Molecular Virology, Pontificia Universidad Católica de Chile | MSHS Pathogen Surveillance Program                                                                                                                                                                                                                         | Rafael A. Medina et al       |
| EPI_ISL_413752 | Weifang Center for Disease Control and Prevention                          | Weifang Center for Disease Control and Prevention & BGI-Shenzhen                                                                                                                                                                                           | Qing Nie et al               |
| EPI_ISL_408481 | National Institute for Viral Disease Control and Prevention, China CDC     | National Institute for Viral Disease Control & Prevention, CCDC                                                                                                                                                                                            | Wenjie Tan et al             |
| EPI_ISL_408478 | Yongchuan District Center for Disease Control and Prevention               | Chongqing Municipal Center for Disease Control and Prevention                                                                                                                                                                                              | Ye Sheng et al               |
| EPI_ISL_408479 | Zhongxian Center for Disease Control and Prevention                        | Chongqing Municipal Center for Disease Control and Prevention                                                                                                                                                                                              | Ye Sheng et al               |











































































































































|                |                                                                                                                   |                                                                            |                       |
|----------------|-------------------------------------------------------------------------------------------------------------------|----------------------------------------------------------------------------|-----------------------|
| EPI_ISL_572602 | Quadram Institute Bioscience                                                                                      | COVID-19 Genomics UK (COG-UK) Consortium                                   | Dave J. Baker et al   |
| EPI_ISL_584166 | Quadram Institute Bioscience                                                                                      | COVID-19 Genomics UK (COG-UK) Consortium                                   | Dave J. Baker et al   |
| EPI_ISL_566357 | Lighthouse Lab in Alderley Park                                                                                   | Wellcome Sanger Institute for the COVID-19 Genomics UK (COG-UK) consortium | Jacquelyn Wynn et al  |
| EPI_ISL_566375 | Lighthouse Lab in Alderley Park                                                                                   | Wellcome Sanger Institute for the COVID-19 Genomics UK (COG-UK) consortium | Jacquelyn Wynn et al  |
| EPI_ISL_576655 | Oxford Viromics, NDM, University of Oxford; Oxford University Hospitals; Basingstoke and North Hampshire Hospital | COVID-19 Genomics UK (COG-UK) Consortium                                   | Tanya Golubchik et al |
| EPI_ISL_576687 | Oxford Viromics, NDM, University of Oxford; Oxford University Hospitals; Basingstoke and North Hampshire Hospital | COVID-19 Genomics UK (COG-UK) Consortium                                   | Tanya Golubchik et al |
| EPI_ISL_589385 | Lighthouse Lab in Alderley Park                                                                                   | Wellcome Sanger Institute for the COVID-19 Genomics UK (COG-UK) consortium | Jacquelyn Wynn et al  |
| EPI_ISL_589276 | Lighthouse Lab in Alderley Park                                                                                   | Wellcome Sanger Institute for the COVID-19 Genomics UK (COG-UK) consortium | Jacquelyn Wynn et al  |
| EPI_ISL_580436 | Lighthouse Lab in Alderley Park                                                                                   | Wellcome Sanger Institute for the COVID-19 Genomics UK (COG-UK) consortium | Jacquelyn Wynn et al  |
| EPI_ISL_580600 | Lighthouse Lab in Alderley Park                                                                                   | Wellcome Sanger Institute for the COVID-19 Genomics UK (COG-UK) consortium | Jacquelyn Wynn et al  |
| EPI_ISL_579984 | Lighthouse Lab in Alderley Park                                                                                   | Wellcome Sanger Institute for the COVID-19 Genomics UK (COG-UK) consortium | Jacquelyn Wynn et al  |
| EPI_ISL_580240 | Lighthouse Lab in Alderley Park                                                                                   | Wellcome Sanger Institute for the COVID-19 Genomics UK (COG-UK) consortium | Jacquelyn Wynn et al  |
| EPI_ISL_580251 | Lighthouse Lab in Alderley Park                                                                                   | Wellcome Sanger Institute for the COVID-19 Genomics UK (COG-UK) consortium | Jacquelyn Wynn et al  |
| EPI_ISL_587932 | Lighthouse Lab in Alderley Park                                                                                   | Wellcome Sanger Institute for the COVID-19 Genomics UK (COG-UK) consortium | Jacquelyn Wynn et al  |
| EPI_ISL_587890 | Lighthouse Lab in Alderley Park                                                                                   | Wellcome Sanger Institute for the COVID-19 Genomics UK (COG-UK) consortium | Jacquelyn Wynn et al  |
| EPI_ISL_588020 | Lighthouse Lab in Alderley Park                                                                                   | Wellcome Sanger Institute for the COVID-19 Genomics UK (COG-UK) consortium | Jacquelyn Wynn et al  |
| EPI_ISL_588008 | Lighthouse Lab in Alderley Park                                                                                   | Wellcome Sanger Institute for the COVID-19 Genomics UK (COG-UK) consortium | Jacquelyn Wynn et al  |
| EPI_ISL_587985 | Lighthouse Lab in Alderley Park                                                                                   | Wellcome Sanger Institute for the COVID-19 Genomics UK (COG-UK) consortium | Jacquelyn Wynn et al  |
| EPI_ISL_586892 | Lighthouse Lab in Alderley Park                                                                                   | Wellcome Sanger Institute for the COVID-19 Genomics UK (COG-UK) consortium | Jacquelyn Wynn et al  |
| EPI_ISL_586862 | Lighthouse Lab in Alderley Park                                                                                   | Wellcome Sanger Institute for the COVID-19 Genomics UK (COG-UK) consortium | Jacquelyn Wynn et al  |
| EPI_ISL_586685 | Lighthouse Lab in Alderley Park                                                                                   | Wellcome Sanger Institute for the COVID-19 Genomics UK (COG-UK) consortium | Jacquelyn Wynn et al  |
| EPI_ISL_586611 | Lighthouse Lab in Alderley Park                                                                                   | Wellcome Sanger Institute for the COVID-19 Genomics UK (COG-UK) consortium | Jacquelyn Wynn et al  |
| EPI_ISL_586666 | Lighthouse Lab in Alderley Park                                                                                   | Wellcome Sanger Institute for the COVID-19 Genomics UK (COG-UK) consortium | Jacquelyn Wynn et al  |
| EPI_ISL_586878 | Lighthouse Lab in Alderley Park                                                                                   | Wellcome Sanger Institute for the COVID-19 Genomics UK (COG-UK) consortium | Jacquelyn Wynn et al  |
| EPI_ISL_586741 | Lighthouse Lab in Alderley Park                                                                                   | Wellcome Sanger Institute for the COVID-19 Genomics UK (COG-UK) consortium | Jacquelyn Wynn et al  |
| EPI_ISL_587168 | Lighthouse Lab in Alderley Park                                                                                   | Wellcome Sanger Institute for the COVID-19 Genomics UK (COG-UK) consortium | Jacquelyn Wynn et al  |
| EPI_ISL_586970 | Lighthouse Lab in Alderley Park                                                                                   | Wellcome Sanger Institute for the COVID-19 Genomics UK (COG-UK) consortium | Jacquelyn Wynn et al  |
| EPI_ISL_587185 | Lighthouse Lab in Alderley Park                                                                                   | Wellcome Sanger Institute for the COVID-19 Genomics UK (COG-UK) consortium | Jacquelyn Wynn et al  |
| EPI_ISL_587019 | Lighthouse Lab in Alderley Park                                                                                   | Wellcome Sanger Institute for the COVID-19 Genomics UK (COG-UK) consortium | Jacquelyn Wynn et al  |
| EPI_ISL_587174 | Lighthouse Lab in Alderley Park                                                                                   | Wellcome Sanger Institute for the COVID-19 Genomics UK (COG-UK) consortium | Jacquelyn Wynn et al  |
| EPI_ISL_587221 | Lighthouse Lab in Alderley Park                                                                                   | Wellcome Sanger Institute for the COVID-19 Genomics UK (COG-UK) consortium | Jacquelyn Wynn et al  |



















|                |                                                                                                                   |                                                                            |                       |
|----------------|-------------------------------------------------------------------------------------------------------------------|----------------------------------------------------------------------------|-----------------------|
| EPI_ISL_572870 | Oxford Viromics, NDM, University of Oxford; Oxford University Hospitals; Basingstoke and North Hampshire Hospital | COVID-19 Genomics UK (COG-UK) Consortium                                   | Tanya Golubchik et al |
| EPI_ISL_638069 | Department of Pathology, University of Cambridge                                                                  | COVID-19 Genomics UK (COG-UK) Consortium                                   | Aminu S. Jahun et al  |
| EPI_ISL_638070 | Department of Pathology, University of Cambridge                                                                  | COVID-19 Genomics UK (COG-UK) Consortium                                   | Aminu S. Jahun et al  |
| EPI_ISL_638071 | Department of Pathology, University of Cambridge                                                                  | COVID-19 Genomics UK (COG-UK) Consortium                                   | Aminu S. Jahun et al  |
| EPI_ISL_576958 | Oxford Viromics, NDM, University of Oxford; Oxford University Hospitals; Basingstoke and North Hampshire Hospital | COVID-19 Genomics UK (COG-UK) Consortium                                   | Tanya Golubchik et al |
| EPI_ISL_584392 | Queens Medical Centre, Clinical Microbiology Department / DeepSeq Nottingham                                      | COVID-19 Genomics UK (COG-UK) Consortium                                   | Gemma Clark et al     |
| EPI_ISL_584409 | Queens Medical Centre, Clinical Microbiology Department / DeepSeq Nottingham                                      | COVID-19 Genomics UK (COG-UK) Consortium                                   | Gemma Clark et al     |
| EPI_ISL_584432 | Queens Medical Centre, Clinical Microbiology Department / DeepSeq Nottingham                                      | COVID-19 Genomics UK (COG-UK) Consortium                                   | Gemma Clark et al     |
| EPI_ISL_580391 | Lighthouse Lab in Cambridge                                                                                       | Wellcome Sanger Institute for the COVID-19 Genomics UK (COG-UK) consortium | Rob Howes et al       |
| EPI_ISL_594620 | Oxford Viromics, NDM, University of Oxford; Oxford University Hospitals; Basingstoke and North Hampshire Hospital | COVID-19 Genomics UK (COG-UK) Consortium                                   | Tanya Golubchik et al |
| EPI_ISL_609542 | Lighthouse Lab in Cambridge                                                                                       | Wellcome Sanger Institute for the COVID-19 Genomics UK (COG-UK) consortium | Rob Howes et al       |
| EPI_ISL_609753 | Lighthouse Lab in Cambridge                                                                                       | Wellcome Sanger Institute for the COVID-19 Genomics UK (COG-UK) consortium | Rob Howes et al       |
| EPI_ISL_609659 | Lighthouse Lab in Cambridge                                                                                       | Wellcome Sanger Institute for the COVID-19 Genomics UK (COG-UK) consortium | Rob Howes et al       |
| EPI_ISL_609789 | Lighthouse Lab in Cambridge                                                                                       | Wellcome Sanger Institute for the COVID-19 Genomics UK (COG-UK) consortium | Rob Howes et al       |
| EPI_ISL_609605 | Lighthouse Lab in Cambridge                                                                                       | Wellcome Sanger Institute for the COVID-19 Genomics UK (COG-UK) consortium | Rob Howes et al       |
| EPI_ISL_609693 | Lighthouse Lab in Cambridge                                                                                       | Wellcome Sanger Institute for the COVID-19 Genomics UK (COG-UK) consortium | Rob Howes et al       |
| EPI_ISL_609643 | Lighthouse Lab in Cambridge                                                                                       | Wellcome Sanger Institute for the COVID-19 Genomics UK (COG-UK) consortium | Rob Howes et al       |
| EPI_ISL_609375 | Lighthouse Lab in Cambridge                                                                                       | Wellcome Sanger Institute for the COVID-19 Genomics UK (COG-UK) consortium | Rob Howes et al       |
| EPI_ISL_609516 | Lighthouse Lab in Cambridge                                                                                       | Wellcome Sanger Institute for the COVID-19 Genomics UK (COG-UK) consortium | Rob Howes et al       |
| EPI_ISL_609355 | Lighthouse Lab in Cambridge                                                                                       | Wellcome Sanger Institute for the COVID-19 Genomics UK (COG-UK) consortium | Rob Howes et al       |
| EPI_ISL_597446 | Lighthouse Lab in Cambridge                                                                                       | Wellcome Sanger Institute for the COVID-19 Genomics UK (COG-UK) consortium | Rob Howes et al       |
| EPI_ISL_597143 | Lighthouse Lab in Cambridge                                                                                       | Wellcome Sanger Institute for the COVID-19 Genomics UK (COG-UK) consortium | Rob Howes et al       |
| EPI_ISL_596946 | Lighthouse Lab in Cambridge                                                                                       | Wellcome Sanger Institute for the COVID-19 Genomics UK (COG-UK) consortium | Rob Howes et al       |
| EPI_ISL_596941 | Lighthouse Lab in Cambridge                                                                                       | Wellcome Sanger Institute for the COVID-19 Genomics UK (COG-UK) consortium | Rob Howes et al       |
| EPI_ISL_597185 | Lighthouse Lab in Cambridge                                                                                       | Wellcome Sanger Institute for the COVID-19 Genomics UK (COG-UK) consortium | Rob Howes et al       |
| EPI_ISL_596993 | Lighthouse Lab in Cambridge                                                                                       | Wellcome Sanger Institute for the COVID-19 Genomics UK (COG-UK) consortium | Rob Howes et al       |
| EPI_ISL_596975 | Lighthouse Lab in Cambridge                                                                                       | Wellcome Sanger Institute for the COVID-19 Genomics UK (COG-UK) consortium | Rob Howes et al       |
| EPI_ISL_597196 | Lighthouse Lab in Cambridge                                                                                       | Wellcome Sanger Institute for the COVID-19 Genomics UK (COG-UK) consortium | Rob Howes et al       |
| EPI_ISL_596982 | Lighthouse Lab in Cambridge                                                                                       | Wellcome Sanger Institute for the COVID-19 Genomics UK (COG-UK) consortium | Rob Howes et al       |
| EPI_ISL_597084 | Lighthouse Lab in Cambridge                                                                                       | Wellcome Sanger Institute for the COVID-19 Genomics UK (COG-UK) consortium | Rob Howes et al       |
| EPI_ISL_608430 | Lighthouse Lab in Cambridge                                                                                       | Wellcome Sanger Institute for the COVID-19 Genomics UK (COG-UK) consortium | Rob Howes et al       |











|                |                                                                                                                                                                                  |                                                                            |                        |
|----------------|----------------------------------------------------------------------------------------------------------------------------------------------------------------------------------|----------------------------------------------------------------------------|------------------------|
| EPI_ISL_645920 | Lighthouse Lab in Cambridge                                                                                                                                                      | Wellcome Sanger Institute for the COVID-19 Genomics UK (COG-UK) Consortium | Rob Howes et al        |
| EPI_ISL_646089 | Lighthouse Lab in Cambridge                                                                                                                                                      | Wellcome Sanger Institute for the COVID-19 Genomics UK (COG-UK) Consortium | Rob Howes et al        |
| EPI_ISL_647258 | Lighthouse Lab in Cambridge                                                                                                                                                      | Wellcome Sanger Institute for the COVID-19 Genomics UK (COG-UK) Consortium | Rob Howes et al        |
| EPI_ISL_647449 | Lighthouse Lab in Cambridge                                                                                                                                                      | Wellcome Sanger Institute for the COVID-19 Genomics UK (COG-UK) Consortium | Rob Howes et al        |
| EPI_ISL_647132 | Lighthouse Lab in Cambridge                                                                                                                                                      | Wellcome Sanger Institute for the COVID-19 Genomics UK (COG-UK) Consortium | Rob Howes et al        |
| EPI_ISL_647341 | Lighthouse Lab in Cambridge                                                                                                                                                      | Wellcome Sanger Institute for the COVID-19 Genomics UK (COG-UK) Consortium | Rob Howes et al        |
| EPI_ISL_647422 | Lighthouse Lab in Cambridge                                                                                                                                                      | Wellcome Sanger Institute for the COVID-19 Genomics UK (COG-UK) Consortium | Rob Howes et al        |
| EPI_ISL_647373 | Lighthouse Lab in Cambridge                                                                                                                                                      | Wellcome Sanger Institute for the COVID-19 Genomics UK (COG-UK) Consortium | Rob Howes et al        |
| EPI_ISL_647374 | Lighthouse Lab in Cambridge                                                                                                                                                      | Wellcome Sanger Institute for the COVID-19 Genomics UK (COG-UK) Consortium | Rob Howes et al        |
| EPI_ISL_647190 | Lighthouse Lab in Cambridge                                                                                                                                                      | Wellcome Sanger Institute for the COVID-19 Genomics UK (COG-UK) Consortium | Rob Howes et al        |
| EPI_ISL_647264 | Lighthouse Lab in Cambridge                                                                                                                                                      | Wellcome Sanger Institute for the COVID-19 Genomics UK (COG-UK) Consortium | Rob Howes et al        |
| EPI_ISL_647173 | Lighthouse Lab in Cambridge                                                                                                                                                      | Wellcome Sanger Institute for the COVID-19 Genomics UK (COG-UK) Consortium | Rob Howes et al        |
| EPI_ISL_647188 | Lighthouse Lab in Cambridge                                                                                                                                                      | Wellcome Sanger Institute for the COVID-19 Genomics UK (COG-UK) Consortium | Rob Howes et al        |
| EPI_ISL_647304 | Lighthouse Lab in Cambridge                                                                                                                                                      | Wellcome Sanger Institute for the COVID-19 Genomics UK (COG-UK) Consortium | Rob Howes et al        |
| EPI_ISL_647181 | Lighthouse Lab in Cambridge                                                                                                                                                      | Wellcome Sanger Institute for the COVID-19 Genomics UK (COG-UK) Consortium | Rob Howes et al        |
| EPI_ISL_664752 | Virology Department, Sheffield Teaching Hospitals NHS Foundation Trust/Department of Infection, Immunity and Cardiovascular Disease, The Medical School, University of Sheffield | COVID-19 Genomics UK (COG-UK) Consortium                                   | Thushan de Silva et al |
| EPI_ISL_664602 | Virology Department, Sheffield Teaching Hospitals NHS Foundation Trust/Department of Infection, Immunity and Cardiovascular Disease, The Medical School, University of Sheffield | COVID-19 Genomics UK (COG-UK) Consortium                                   | Thushan de Silva et al |
| EPI_ISL_651078 | Virology Department, Sheffield Teaching Hospitals NHS Foundation Trust/Department of Infection, Immunity and Cardiovascular Disease, The Medical School, University of Sheffield | COVID-19 Genomics UK (COG-UK) Consortium                                   | Thushan de Silva et al |
| EPI_ISL_664600 | Virology Department, Sheffield Teaching Hospitals NHS Foundation Trust/Department of Infection, Immunity and Cardiovascular Disease, The Medical School, University of Sheffield | COVID-19 Genomics UK (COG-UK) Consortium                                   | Thushan de Silva et al |
| EPI_ISL_659373 | Lighthouse Lab in Cambridge                                                                                                                                                      | Wellcome Sanger Institute for the COVID-19 Genomics UK (COG-UK) Consortium | Rob Howes et al        |
| EPI_ISL_659421 | Lighthouse Lab in Cambridge                                                                                                                                                      | Wellcome Sanger Institute for the COVID-19 Genomics UK (COG-UK) Consortium | Rob Howes et al        |
| EPI_ISL_659310 | Lighthouse Lab in Cambridge                                                                                                                                                      | Wellcome Sanger Institute for the COVID-19 Genomics UK (COG-UK) Consortium | Rob Howes et al        |
| EPI_ISL_659207 | Lighthouse Lab in Cambridge                                                                                                                                                      | Wellcome Sanger Institute for the COVID-19 Genomics UK (COG-UK) Consortium | Rob Howes et al        |
| EPI_ISL_659106 | Lighthouse Lab in Cambridge                                                                                                                                                      | Wellcome Sanger Institute for the COVID-19 Genomics UK (COG-UK) Consortium | Rob Howes et al        |
| EPI_ISL_659161 | Lighthouse Lab in Cambridge                                                                                                                                                      | Wellcome Sanger Institute for the COVID-19 Genomics UK (COG-UK) Consortium | Rob Howes et al        |
| EPI_ISL_659412 | Lighthouse Lab in Cambridge                                                                                                                                                      | Wellcome Sanger Institute for the COVID-19 Genomics UK (COG-UK) Consortium | Rob Howes et al        |
| EPI_ISL_659302 | Lighthouse Lab in Cambridge                                                                                                                                                      | Wellcome Sanger Institute for the COVID-19 Genomics UK (COG-UK) Consortium | Rob Howes et al        |
| EPI_ISL_659294 | Lighthouse Lab in Cambridge                                                                                                                                                      | Wellcome Sanger Institute for the COVID-19 Genomics UK (COG-UK) Consortium | Rob Howes et al        |
| EPI_ISL_659295 | Lighthouse Lab in Cambridge                                                                                                                                                      | Wellcome Sanger Institute for the COVID-19 Genomics UK (COG-UK) Consortium | Rob Howes et al        |

























































|                |                                                                                                                                                                                                 |                                                                            |                                           |
|----------------|-------------------------------------------------------------------------------------------------------------------------------------------------------------------------------------------------|----------------------------------------------------------------------------|-------------------------------------------|
| EPI_ISL_568365 | Lighthouse Lab in Milton Keynes                                                                                                                                                                 | Wellcome Sanger Institute for the COVID-19 Genomics UK (COG-UK) consortium | The Lighthouse Lab in Milton Keynes et al |
| EPI_ISL_550733 | Lighthouse Lab in Milton Keynes                                                                                                                                                                 | Wellcome Sanger Institute for the COVID-19 Genomics UK (COG-UK) consortium | The Lighthouse Lab in Milton Keynes et al |
| EPI_ISL_550622 | Lighthouse Lab in Milton Keynes                                                                                                                                                                 | Wellcome Sanger Institute for the COVID-19 Genomics UK (COG-UK) consortium | The Lighthouse Lab in Milton Keynes et al |
| EPI_ISL_550728 | Lighthouse Lab in Milton Keynes                                                                                                                                                                 | Wellcome Sanger Institute for the COVID-19 Genomics UK (COG-UK) consortium | The Lighthouse Lab in Milton Keynes et al |
| EPI_ISL_550629 | Lighthouse Lab in Milton Keynes                                                                                                                                                                 | Wellcome Sanger Institute for the COVID-19 Genomics UK (COG-UK) consortium | The Lighthouse Lab in Milton Keynes et al |
| EPI_ISL_550045 | Lighthouse Lab in Milton Keynes                                                                                                                                                                 | Wellcome Sanger Institute for the COVID-19 Genomics UK (COG-UK) consortium | The Lighthouse Lab in Milton Keynes et al |
| EPI_ISL_550094 | Lighthouse Lab in Milton Keynes                                                                                                                                                                 | Wellcome Sanger Institute for the COVID-19 Genomics UK (COG-UK) consortium | The Lighthouse Lab in Milton Keynes et al |
| EPI_ISL_549993 | Lighthouse Lab in Milton Keynes                                                                                                                                                                 | Wellcome Sanger Institute for the COVID-19 Genomics UK (COG-UK) consortium | The Lighthouse Lab in Milton Keynes et al |
| EPI_ISL_550099 | Lighthouse Lab in Milton Keynes                                                                                                                                                                 | Wellcome Sanger Institute for the COVID-19 Genomics UK (COG-UK) consortium | The Lighthouse Lab in Milton Keynes et al |
| EPI_ISL_550173 | Lighthouse Lab in Milton Keynes                                                                                                                                                                 | Wellcome Sanger Institute for the COVID-19 Genomics UK (COG-UK) consortium | The Lighthouse Lab in Milton Keynes et al |
| EPI_ISL_572871 | Virology Department, Royal Infirmary of Edinburgh, NHS Lothian / School of Biological Sciences, University of Edinburgh / Institute of Genetics and Molecular Medicine, University of Edinburgh | COVID-19 Genomics UK (COG-UK) Consortium                                   | McHugh M et al                            |
| EPI_ISL_550082 | Lighthouse Lab in Milton Keynes                                                                                                                                                                 | Wellcome Sanger Institute for the COVID-19 Genomics UK (COG-UK) consortium | The Lighthouse Lab in Milton Keynes et al |
| EPI_ISL_549342 | Oxford Viromics, NDM, University of Oxford; Oxford University Hospitals; Basingstoke and North Hampshire Hospital                                                                               | COVID-19 Genomics UK (COG-UK) Consortium                                   | Tanya Golubchik et al                     |
| EPI_ISL_550089 | Lighthouse Lab in Milton Keynes                                                                                                                                                                 | Wellcome Sanger Institute for the COVID-19 Genomics UK (COG-UK) consortium | The Lighthouse Lab in Milton Keynes et al |
| EPI_ISL_551204 | Lighthouse Lab in Milton Keynes                                                                                                                                                                 | Wellcome Sanger Institute for the COVID-19 Genomics UK (COG-UK) consortium | The Lighthouse Lab in Milton Keynes et al |
| EPI_ISL_551023 | Lighthouse Lab in Milton Keynes                                                                                                                                                                 | Wellcome Sanger Institute for the COVID-19 Genomics UK (COG-UK) consortium | The Lighthouse Lab in Milton Keynes et al |
| EPI_ISL_551192 | Lighthouse Lab in Milton Keynes                                                                                                                                                                 | Wellcome Sanger Institute for the COVID-19 Genomics UK (COG-UK) consortium | The Lighthouse Lab in Milton Keynes et al |
| EPI_ISL_551193 | Lighthouse Lab in Milton Keynes                                                                                                                                                                 | Wellcome Sanger Institute for the COVID-19 Genomics UK (COG-UK) consortium | The Lighthouse Lab in Milton Keynes et al |
| EPI_ISL_551257 | Lighthouse Lab in Milton Keynes                                                                                                                                                                 | Wellcome Sanger Institute for the COVID-19 Genomics UK (COG-UK) consortium | The Lighthouse Lab in Milton Keynes et al |
| EPI_ISL_550856 | Lighthouse Lab in Milton Keynes                                                                                                                                                                 | Wellcome Sanger Institute for the COVID-19 Genomics UK (COG-UK) consortium | The Lighthouse Lab in Milton Keynes et al |
| EPI_ISL_551174 | Lighthouse Lab in Milton Keynes                                                                                                                                                                 | Wellcome Sanger Institute for the COVID-19 Genomics UK (COG-UK) consortium | The Lighthouse Lab in Milton Keynes et al |
| EPI_ISL_551125 | Lighthouse Lab in Milton Keynes                                                                                                                                                                 | Wellcome Sanger Institute for the COVID-19 Genomics UK (COG-UK) consortium | The Lighthouse Lab in Milton Keynes et al |
| EPI_ISL_551209 | Lighthouse Lab in Milton Keynes                                                                                                                                                                 | Wellcome Sanger Institute for the COVID-19 Genomics UK (COG-UK) consortium | The Lighthouse Lab in Milton Keynes et al |
| EPI_ISL_550868 | Lighthouse Lab in Milton Keynes                                                                                                                                                                 | Wellcome Sanger Institute for the COVID-19 Genomics UK (COG-UK) consortium | The Lighthouse Lab in Milton Keynes et al |
| EPI_ISL_550889 | Lighthouse Lab in Milton Keynes                                                                                                                                                                 | Wellcome Sanger Institute for the COVID-19 Genomics UK (COG-UK) consortium | The Lighthouse Lab in Milton Keynes et al |
| EPI_ISL_550913 | Lighthouse Lab in Milton Keynes                                                                                                                                                                 | Wellcome Sanger Institute for the COVID-19 Genomics UK (COG-UK) consortium | The Lighthouse Lab in Milton Keynes et al |
| EPI_ISL_550982 | Lighthouse Lab in Milton Keynes                                                                                                                                                                 | Wellcome Sanger Institute for the COVID-19 Genomics UK (COG-UK) consortium | The Lighthouse Lab in Milton Keynes et al |
| EPI_ISL_550975 | Lighthouse Lab in Milton Keynes                                                                                                                                                                 | Wellcome Sanger Institute for the COVID-19 Genomics UK (COG-UK) consortium | The Lighthouse Lab in Milton Keynes et al |
| EPI_ISL_550977 | Lighthouse Lab in Milton Keynes                                                                                                                                                                 | Wellcome Sanger Institute for the COVID-19 Genomics UK (COG-UK) consortium | The Lighthouse Lab in Milton Keynes et al |
| EPI_ISL_550797 | Lighthouse Lab in Milton Keynes                                                                                                                                                                 | Wellcome Sanger Institute for the COVID-19 Genomics UK (COG-UK) consortium | The Lighthouse Lab in Milton Keynes et al |

|                |                                                                                                                                                                                                                     |                                                                            |                                           |
|----------------|---------------------------------------------------------------------------------------------------------------------------------------------------------------------------------------------------------------------|----------------------------------------------------------------------------|-------------------------------------------|
| EPI_ISL_551039 | Lighthouse Lab in Milton Keynes                                                                                                                                                                                     | Wellcome Sanger Institute for the COVID-19 Genomics UK (COG-UK) consortium | The Lighthouse Lab in Milton Keynes et al |
| EPI_ISL_551102 | Lighthouse Lab in Milton Keynes                                                                                                                                                                                     | Wellcome Sanger Institute for the COVID-19 Genomics UK (COG-UK) consortium | The Lighthouse Lab in Milton Keynes et al |
| EPI_ISL_551056 | Lighthouse Lab in Milton Keynes                                                                                                                                                                                     | Wellcome Sanger Institute for the COVID-19 Genomics UK (COG-UK) consortium | The Lighthouse Lab in Milton Keynes et al |
| EPI_ISL_566637 | Lighthouse Lab in Milton Keynes                                                                                                                                                                                     | Wellcome Sanger Institute for the COVID-19 Genomics UK (COG-UK) consortium | The Lighthouse Lab in Milton Keynes et al |
| EPI_ISL_566436 | Lighthouse Lab in Milton Keynes                                                                                                                                                                                     | Wellcome Sanger Institute for the COVID-19 Genomics UK (COG-UK) consortium | The Lighthouse Lab in Milton Keynes et al |
| EPI_ISL_566499 | Lighthouse Lab in Milton Keynes                                                                                                                                                                                     | Wellcome Sanger Institute for the COVID-19 Genomics UK (COG-UK) consortium | The Lighthouse Lab in Milton Keynes et al |
| EPI_ISL_566472 | Lighthouse Lab in Milton Keynes                                                                                                                                                                                     | Wellcome Sanger Institute for the COVID-19 Genomics UK (COG-UK) consortium | The Lighthouse Lab in Milton Keynes et al |
| EPI_ISL_566811 | Lighthouse Lab in Milton Keynes                                                                                                                                                                                     | Wellcome Sanger Institute for the COVID-19 Genomics UK (COG-UK) consortium | The Lighthouse Lab in Milton Keynes et al |
| EPI_ISL_566911 | Lighthouse Lab in Milton Keynes                                                                                                                                                                                     | Wellcome Sanger Institute for the COVID-19 Genomics UK (COG-UK) consortium | The Lighthouse Lab in Milton Keynes et al |
| EPI_ISL_566942 | Lighthouse Lab in Milton Keynes                                                                                                                                                                                     | Wellcome Sanger Institute for the COVID-19 Genomics UK (COG-UK) consortium | The Lighthouse Lab in Milton Keynes et al |
| EPI_ISL_566690 | Lighthouse Lab in Milton Keynes                                                                                                                                                                                     | Wellcome Sanger Institute for the COVID-19 Genomics UK (COG-UK) consortium | The Lighthouse Lab in Milton Keynes et al |
| EPI_ISL_566743 | Lighthouse Lab in Milton Keynes                                                                                                                                                                                     | Wellcome Sanger Institute for the COVID-19 Genomics UK (COG-UK) consortium | The Lighthouse Lab in Milton Keynes et al |
| EPI_ISL_566980 | Lighthouse Lab in Milton Keynes                                                                                                                                                                                     | Wellcome Sanger Institute for the COVID-19 Genomics UK (COG-UK) consortium | The Lighthouse Lab in Milton Keynes et al |
| EPI_ISL_566770 | Lighthouse Lab in Milton Keynes                                                                                                                                                                                     | Wellcome Sanger Institute for the COVID-19 Genomics UK (COG-UK) consortium | The Lighthouse Lab in Milton Keynes et al |
| EPI_ISL_566939 | Lighthouse Lab in Milton Keynes                                                                                                                                                                                     | Wellcome Sanger Institute for the COVID-19 Genomics UK (COG-UK) consortium | The Lighthouse Lab in Milton Keynes et al |
| EPI_ISL_566751 | Lighthouse Lab in Milton Keynes                                                                                                                                                                                     | Wellcome Sanger Institute for the COVID-19 Genomics UK (COG-UK) consortium | The Lighthouse Lab in Milton Keynes et al |
| EPI_ISL_549343 | Centre for Enzyme Innovation, University of Portsmouth / Translational Research Laboratory, Portsmouth Hospitals NHS Trust                                                                                          | COVID-19 Genomics UK (COG-UK) Consortium                                   | Angela Beckett et al                      |
| EPI_ISL_572596 | Northumbria University / South Tees Hospitals NHS Foundation Trust / North Cumbria Integrated Care NHS Foundation Trust / North Tees and Hartlepool NHS Foundation Trust / Newcastle Hospitals NHS Foundation Trust | COVID-19 Genomics UK (COG-UK) Consortium                                   | Darren L Smith et al                      |
| EPI_ISL_601564 | Lighthouse Lab in Milton Keynes                                                                                                                                                                                     | Wellcome Sanger Institute for the COVID-19 Genomics UK (COG-UK) consortium | The Lighthouse Lab in Milton Keynes et al |
| EPI_ISL_601524 | Lighthouse Lab in Milton Keynes                                                                                                                                                                                     | Wellcome Sanger Institute for the COVID-19 Genomics UK (COG-UK) consortium | The Lighthouse Lab in Milton Keynes et al |
| EPI_ISL_601777 | Lighthouse Lab in Milton Keynes                                                                                                                                                                                     | Wellcome Sanger Institute for the COVID-19 Genomics UK (COG-UK) consortium | The Lighthouse Lab in Milton Keynes et al |
| EPI_ISL_601557 | Lighthouse Lab in Milton Keynes                                                                                                                                                                                     | Wellcome Sanger Institute for the COVID-19 Genomics UK (COG-UK) consortium | The Lighthouse Lab in Milton Keynes et al |
| EPI_ISL_601739 | Lighthouse Lab in Milton Keynes                                                                                                                                                                                     | Wellcome Sanger Institute for the COVID-19 Genomics UK (COG-UK) consortium | The Lighthouse Lab in Milton Keynes et al |
| EPI_ISL_601412 | Lighthouse Lab in Milton Keynes                                                                                                                                                                                     | Wellcome Sanger Institute for the COVID-19 Genomics UK (COG-UK) consortium | The Lighthouse Lab in Milton Keynes et al |
| EPI_ISL_601443 | Lighthouse Lab in Milton Keynes                                                                                                                                                                                     | Wellcome Sanger Institute for the COVID-19 Genomics UK (COG-UK) consortium | The Lighthouse Lab in Milton Keynes et al |
| EPI_ISL_601359 | Lighthouse Lab in Milton Keynes                                                                                                                                                                                     | Wellcome Sanger Institute for the COVID-19 Genomics UK (COG-UK) consortium | The Lighthouse Lab in Milton Keynes et al |
| EPI_ISL_601465 | Lighthouse Lab in Milton Keynes                                                                                                                                                                                     | Wellcome Sanger Institute for the COVID-19 Genomics UK (COG-UK) consortium | The Lighthouse Lab in Milton Keynes et al |
| EPI_ISL_601439 | Lighthouse Lab in Milton Keynes                                                                                                                                                                                     | Wellcome Sanger Institute for the COVID-19 Genomics UK (COG-UK) consortium | The Lighthouse Lab in Milton Keynes et al |
| EPI_ISL_601376 | Lighthouse Lab in Milton Keynes                                                                                                                                                                                     | Wellcome Sanger Institute for the COVID-19 Genomics UK (COG-UK) consortium | The Lighthouse Lab in Milton Keynes et al |
| EPI_ISL_601451 | Lighthouse Lab in Milton Keynes                                                                                                                                                                                     | Wellcome Sanger Institute for the COVID-19 Genomics UK (COG-UK) consortium | The Lighthouse Lab in Milton Keynes et al |







|                |                                                                                                                                                                                                                     |                                                                            |                                           |
|----------------|---------------------------------------------------------------------------------------------------------------------------------------------------------------------------------------------------------------------|----------------------------------------------------------------------------|-------------------------------------------|
| EPI_ISL_595043 | Northumbria University / South Tees Hospitals NHS Foundation Trust / North Cumbria Integrated Care NHS Foundation Trust / North Tees and Hartlepool NHS Foundation Trust / Newcastle Hospitals NHS Foundation Trust | COVID-19 Genomics UK (COG-UK) Consortium                                   | Darren L Smith et al                      |
| EPI_ISL_612132 | Wales Specialist Virology Centre Sequencing lab: Pathogen Genomics Unit                                                                                                                                             | COVID-19 Genomics UK (COG-UK) Consortium                                   | Catherine Moore et al                     |
| EPI_ISL_612133 | Wales Specialist Virology Centre Sequencing lab: Pathogen Genomics Unit                                                                                                                                             | COVID-19 Genomics UK (COG-UK) Consortium                                   | Catherine Moore et al                     |
| EPI_ISL_627212 | Wales Specialist Virology Centre Sequencing lab: Pathogen Genomics Unit                                                                                                                                             | COVID-19 Genomics UK (COG-UK) Consortium                                   | Catherine Moore et al                     |
| EPI_ISL_595087 | Queens Medical Centre, Clinical Microbiology Department / DeepSeq Nottingham                                                                                                                                        | COVID-19 Genomics UK (COG-UK) Consortium                                   | Gemma Clark et al                         |
| EPI_ISL_612134 | Northumbria University / South Tees Hospitals NHS Foundation Trust / North Cumbria Integrated Care NHS Foundation Trust / North Tees and Hartlepool NHS Foundation Trust / Newcastle Hospitals NHS Foundation Trust | COVID-19 Genomics UK (COG-UK) Consortium                                   | Darren L Smith et al                      |
| EPI_ISL_650401 | Centre for Enzyme Innovation, University of Portsmouth / Translational Research Laboratory, Portsmouth Hospitals NHS Trust                                                                                          | COVID-19 Genomics UK (COG-UK) Consortium                                   | Angela Beckett et al                      |
| EPI_ISL_650947 | Centre for Enzyme Innovation, University of Portsmouth / Translational Research Laboratory, Portsmouth Hospitals NHS Trust                                                                                          | COVID-19 Genomics UK (COG-UK) Consortium                                   | Angela Beckett et al                      |
| EPI_ISL_650566 | Centre for Enzyme Innovation, University of Portsmouth / Translational Research Laboratory, Portsmouth Hospitals NHS Trust                                                                                          | COVID-19 Genomics UK (COG-UK) Consortium                                   | Angela Beckett et al                      |
| EPI_ISL_598575 | Lighthouse Lab in Milton Keynes                                                                                                                                                                                     | Wellcome Sanger Institute for the COVID-19 Genomics UK (COG-UK) consortium | The Lighthouse Lab in Milton Keynes et al |
| EPI_ISL_598609 | Lighthouse Lab in Milton Keynes                                                                                                                                                                                     | Wellcome Sanger Institute for the COVID-19 Genomics UK (COG-UK) consortium | The Lighthouse Lab in Milton Keynes et al |
| EPI_ISL_598670 | Lighthouse Lab in Milton Keynes                                                                                                                                                                                     | Wellcome Sanger Institute for the COVID-19 Genomics UK (COG-UK) consortium | The Lighthouse Lab in Milton Keynes et al |
| EPI_ISL_598554 | Lighthouse Lab in Milton Keynes                                                                                                                                                                                     | Wellcome Sanger Institute for the COVID-19 Genomics UK (COG-UK) consortium | The Lighthouse Lab in Milton Keynes et al |
| EPI_ISL_598715 | Lighthouse Lab in Milton Keynes                                                                                                                                                                                     | Wellcome Sanger Institute for the COVID-19 Genomics UK (COG-UK) consortium | The Lighthouse Lab in Milton Keynes et al |
| EPI_ISL_598654 | Lighthouse Lab in Milton Keynes                                                                                                                                                                                     | Wellcome Sanger Institute for the COVID-19 Genomics UK (COG-UK) consortium | The Lighthouse Lab in Milton Keynes et al |
| EPI_ISL_598689 | Lighthouse Lab in Milton Keynes                                                                                                                                                                                     | Wellcome Sanger Institute for the COVID-19 Genomics UK (COG-UK) consortium | The Lighthouse Lab in Milton Keynes et al |
| EPI_ISL_598550 | Lighthouse Lab in Milton Keynes                                                                                                                                                                                     | Wellcome Sanger Institute for the COVID-19 Genomics UK (COG-UK) consortium | The Lighthouse Lab in Milton Keynes et al |
| EPI_ISL_598804 | Lighthouse Lab in Milton Keynes                                                                                                                                                                                     | Wellcome Sanger Institute for the COVID-19 Genomics UK (COG-UK) consortium | The Lighthouse Lab in Milton Keynes et al |
| EPI_ISL_598626 | Lighthouse Lab in Milton Keynes                                                                                                                                                                                     | Wellcome Sanger Institute for the COVID-19 Genomics UK (COG-UK) consortium | The Lighthouse Lab in Milton Keynes et al |
| EPI_ISL_598629 | Lighthouse Lab in Milton Keynes                                                                                                                                                                                     | Wellcome Sanger Institute for the COVID-19 Genomics UK (COG-UK) consortium | The Lighthouse Lab in Milton Keynes et al |
| EPI_ISL_598454 | Lighthouse Lab in Milton Keynes                                                                                                                                                                                     | Wellcome Sanger Institute for the COVID-19 Genomics UK (COG-UK) consortium | The Lighthouse Lab in Milton Keynes et al |
| EPI_ISL_598406 | Lighthouse Lab in Milton Keynes                                                                                                                                                                                     | Wellcome Sanger Institute for the COVID-19 Genomics UK (COG-UK) consortium | The Lighthouse Lab in Milton Keynes et al |
| EPI_ISL_598415 | Lighthouse Lab in Milton Keynes                                                                                                                                                                                     | Wellcome Sanger Institute for the COVID-19 Genomics UK (COG-UK) consortium | The Lighthouse Lab in Milton Keynes et al |
| EPI_ISL_598411 | Lighthouse Lab in Milton Keynes                                                                                                                                                                                     | Wellcome Sanger Institute for the COVID-19 Genomics UK (COG-UK) consortium | The Lighthouse Lab in Milton Keynes et al |
| EPI_ISL_598328 | Lighthouse Lab in Milton Keynes                                                                                                                                                                                     | Wellcome Sanger Institute for the COVID-19 Genomics UK (COG-UK) consortium | The Lighthouse Lab in Milton Keynes et al |
| EPI_ISL_598510 | Lighthouse Lab in Milton Keynes                                                                                                                                                                                     | Wellcome Sanger Institute for the COVID-19 Genomics UK (COG-UK) consortium | The Lighthouse Lab in Milton Keynes et al |
| EPI_ISL_598430 | Lighthouse Lab in Milton Keynes                                                                                                                                                                                     | Wellcome Sanger Institute for the COVID-19 Genomics UK (COG-UK) consortium | The Lighthouse Lab in Milton Keynes et al |
| EPI_ISL_598437 | Lighthouse Lab in Milton Keynes                                                                                                                                                                                     | Wellcome Sanger Institute for the COVID-19 Genomics UK (COG-UK) consortium | The Lighthouse Lab in Milton Keynes et al |
| EPI_ISL_598467 | Lighthouse Lab in Milton Keynes                                                                                                                                                                                     | Wellcome Sanger Institute for the COVID-19 Genomics UK (COG-UK) consortium | The Lighthouse Lab in Milton Keynes et al |

|                |                                                                                                                                                                                  |                                                                            |                                           |
|----------------|----------------------------------------------------------------------------------------------------------------------------------------------------------------------------------|----------------------------------------------------------------------------|-------------------------------------------|
| EPI_ISL_598380 | Lighthouse Lab in Milton Keynes                                                                                                                                                  | Wellcome Sanger Institute for the COVID-19 Genomics UK (COG-UK) consortium | The Lighthouse Lab in Milton Keynes et al |
| EPI_ISL_609272 | Lighthouse Lab in Milton Keynes                                                                                                                                                  | Wellcome Sanger Institute for the COVID-19 Genomics UK (COG-UK) consortium | The Lighthouse Lab in Milton Keynes et al |
| EPI_ISL_598523 | Lighthouse Lab in Milton Keynes                                                                                                                                                  | Wellcome Sanger Institute for the COVID-19 Genomics UK (COG-UK) consortium | The Lighthouse Lab in Milton Keynes et al |
| EPI_ISL_595139 | Quadram Institute Bioscience                                                                                                                                                     | COVID-19 Genomics UK (COG-UK) Consortium                                   | Dave J. Baker et al                       |
| EPI_ISL_665760 | University of Exeter                                                                                                                                                             | COVID-19 Genomics UK (COG-UK) Consortium                                   | Ben Temperton et al                       |
| EPI_ISL_608773 | Lighthouse Lab in Milton Keynes                                                                                                                                                  | Wellcome Sanger Institute for the COVID-19 Genomics UK (COG-UK) consortium | The Lighthouse Lab in Milton Keynes et al |
| EPI_ISL_626747 | Virology Department, Sheffield Teaching Hospitals NHS Foundation Trust/Department of Infection, Immunity and Cardiovascular Disease, The Medical School, University of Sheffield | COVID-19 Genomics UK (COG-UK) Consortium                                   | Thushan de Silva et al                    |
| EPI_ISL_626827 | Virology Department, Sheffield Teaching Hospitals NHS Foundation Trust/Department of Infection, Immunity and Cardiovascular Disease, The Medical School, University of Sheffield | COVID-19 Genomics UK (COG-UK) Consortium                                   | Thushan de Silva et al                    |
| EPI_ISL_608717 | Lighthouse Lab in Milton Keynes                                                                                                                                                  | Wellcome Sanger Institute for the COVID-19 Genomics UK (COG-UK) consortium | The Lighthouse Lab in Milton Keynes et al |
| EPI_ISL_608829 | Lighthouse Lab in Milton Keynes                                                                                                                                                  | Wellcome Sanger Institute for the COVID-19 Genomics UK (COG-UK) consortium | The Lighthouse Lab in Milton Keynes et al |
| EPI_ISL_608736 | Lighthouse Lab in Milton Keynes                                                                                                                                                  | Wellcome Sanger Institute for the COVID-19 Genomics UK (COG-UK) consortium | The Lighthouse Lab in Milton Keynes et al |
| EPI_ISL_608762 | Lighthouse Lab in Milton Keynes                                                                                                                                                  | Wellcome Sanger Institute for the COVID-19 Genomics UK (COG-UK) consortium | The Lighthouse Lab in Milton Keynes et al |
| EPI_ISL_665570 | University of Exeter                                                                                                                                                             | COVID-19 Genomics UK (COG-UK) Consortium                                   | Ben Temperton et al                       |
| EPI_ISL_665435 | University of Exeter                                                                                                                                                             | COVID-19 Genomics UK (COG-UK) Consortium                                   | Ben Temperton et al                       |
| EPI_ISL_606903 | Lighthouse Lab in Milton Keynes                                                                                                                                                  | Wellcome Sanger Institute for the COVID-19 Genomics UK (COG-UK) consortium | The Lighthouse Lab in Milton Keynes et al |
| EPI_ISL_606633 | Lighthouse Lab in Milton Keynes                                                                                                                                                  | Wellcome Sanger Institute for the COVID-19 Genomics UK (COG-UK) consortium | The Lighthouse Lab in Milton Keynes et al |
| EPI_ISL_606880 | Lighthouse Lab in Milton Keynes                                                                                                                                                  | Wellcome Sanger Institute for the COVID-19 Genomics UK (COG-UK) consortium | The Lighthouse Lab in Milton Keynes et al |
| EPI_ISL_606905 | Lighthouse Lab in Milton Keynes                                                                                                                                                  | Wellcome Sanger Institute for the COVID-19 Genomics UK (COG-UK) consortium | The Lighthouse Lab in Milton Keynes et al |
| EPI_ISL_606700 | Lighthouse Lab in Milton Keynes                                                                                                                                                  | Wellcome Sanger Institute for the COVID-19 Genomics UK (COG-UK) consortium | The Lighthouse Lab in Milton Keynes et al |
| EPI_ISL_606656 | Lighthouse Lab in Milton Keynes                                                                                                                                                  | Wellcome Sanger Institute for the COVID-19 Genomics UK (COG-UK) consortium | The Lighthouse Lab in Milton Keynes et al |
| EPI_ISL_606862 | Lighthouse Lab in Milton Keynes                                                                                                                                                  | Wellcome Sanger Institute for the COVID-19 Genomics UK (COG-UK) consortium | The Lighthouse Lab in Milton Keynes et al |
| EPI_ISL_606692 | Lighthouse Lab in Milton Keynes                                                                                                                                                  | Wellcome Sanger Institute for the COVID-19 Genomics UK (COG-UK) consortium | The Lighthouse Lab in Milton Keynes et al |
| EPI_ISL_606867 | Lighthouse Lab in Milton Keynes                                                                                                                                                  | Wellcome Sanger Institute for the COVID-19 Genomics UK (COG-UK) consortium | The Lighthouse Lab in Milton Keynes et al |
| EPI_ISL_606740 | Lighthouse Lab in Milton Keynes                                                                                                                                                  | Wellcome Sanger Institute for the COVID-19 Genomics UK (COG-UK) consortium | The Lighthouse Lab in Milton Keynes et al |
| EPI_ISL_606732 | Lighthouse Lab in Milton Keynes                                                                                                                                                  | Wellcome Sanger Institute for the COVID-19 Genomics UK (COG-UK) consortium | The Lighthouse Lab in Milton Keynes et al |
| EPI_ISL_606298 | Lighthouse Lab in Milton Keynes                                                                                                                                                  | Wellcome Sanger Institute for the COVID-19 Genomics UK (COG-UK) consortium | The Lighthouse Lab in Milton Keynes et al |
| EPI_ISL_606424 | Lighthouse Lab in Milton Keynes                                                                                                                                                  | Wellcome Sanger Institute for the COVID-19 Genomics UK (COG-UK) consortium | The Lighthouse Lab in Milton Keynes et al |
| EPI_ISL_606909 | Lighthouse Lab in Milton Keynes                                                                                                                                                  | Wellcome Sanger Institute for the COVID-19 Genomics UK (COG-UK) consortium | The Lighthouse Lab in Milton Keynes et al |
| EPI_ISL_606879 | Lighthouse Lab in Milton Keynes                                                                                                                                                  | Wellcome Sanger Institute for the COVID-19 Genomics UK (COG-UK) consortium | The Lighthouse Lab in Milton Keynes et al |
| EPI_ISL_607410 | Lighthouse Lab in Milton Keynes                                                                                                                                                  | Wellcome Sanger Institute for the COVID-19 Genomics UK (COG-UK) consortium | The Lighthouse Lab in Milton Keynes et al |
| EPI_ISL_607326 | Lighthouse Lab in Milton Keynes                                                                                                                                                  | Wellcome Sanger Institute for the COVID-19 Genomics UK (COG-UK) consortium | The Lighthouse Lab in Milton Keynes et al |









|                |                                                                                                                                                                                  |                                                                            |                                           |
|----------------|----------------------------------------------------------------------------------------------------------------------------------------------------------------------------------|----------------------------------------------------------------------------|-------------------------------------------|
| EPI_ISL_629446 | Lighthouse Lab in Milton Keynes                                                                                                                                                  | Wellcome Sanger Institute for the COVID-19 Genomics UK (COG-UK) consortium | The Lighthouse Lab in Milton Keynes et al |
| EPI_ISL_629660 | Lighthouse Lab in Milton Keynes                                                                                                                                                  | Wellcome Sanger Institute for the COVID-19 Genomics UK (COG-UK) consortium | The Lighthouse Lab in Milton Keynes et al |
| EPI_ISL_629752 | Lighthouse Lab in Milton Keynes                                                                                                                                                  | Wellcome Sanger Institute for the COVID-19 Genomics UK (COG-UK) consortium | The Lighthouse Lab in Milton Keynes et al |
| EPI_ISL_629485 | Lighthouse Lab in Milton Keynes                                                                                                                                                  | Wellcome Sanger Institute for the COVID-19 Genomics UK (COG-UK) consortium | The Lighthouse Lab in Milton Keynes et al |
| EPI_ISL_629440 | Lighthouse Lab in Milton Keynes                                                                                                                                                  | Wellcome Sanger Institute for the COVID-19 Genomics UK (COG-UK) consortium | The Lighthouse Lab in Milton Keynes et al |
| EPI_ISL_651431 | Oxford Viromics, NDM, University of Oxford; Oxford University Hospitals; Basingstoke and North Hampshire Hospital                                                                | COVID-19 Genomics UK (COG-UK) Consortium                                   | Tanya Golubchik et al                     |
| EPI_ISL_651432 | Oxford Viromics, NDM, University of Oxford; Oxford University Hospitals; Basingstoke and North Hampshire Hospital                                                                | COVID-19 Genomics UK (COG-UK) Consortium                                   | Tanya Golubchik et al                     |
| EPI_ISL_651433 | Oxford Viromics, NDM, University of Oxford; Oxford University Hospitals; Basingstoke and North Hampshire Hospital                                                                | COVID-19 Genomics UK (COG-UK) Consortium                                   | Tanya Golubchik et al                     |
| EPI_ISL_643989 | Lighthouse Lab in Milton Keynes                                                                                                                                                  | Wellcome Sanger Institute for the COVID-19 Genomics UK (COG-UK) Consortium | The Lighthouse Lab in Milton Keynes et al |
| EPI_ISL_643987 | Lighthouse Lab in Milton Keynes                                                                                                                                                  | Wellcome Sanger Institute for the COVID-19 Genomics UK (COG-UK) Consortium | The Lighthouse Lab in Milton Keynes et al |
| EPI_ISL_642782 | Lighthouse Lab in Milton Keynes                                                                                                                                                  | Wellcome Sanger Institute for the COVID-19 Genomics UK (COG-UK) Consortium | The Lighthouse Lab in Milton Keynes et al |
| EPI_ISL_642837 | Lighthouse Lab in Milton Keynes                                                                                                                                                  | Wellcome Sanger Institute for the COVID-19 Genomics UK (COG-UK) Consortium | The Lighthouse Lab in Milton Keynes et al |
| EPI_ISL_643020 | Lighthouse Lab in Milton Keynes                                                                                                                                                  | Wellcome Sanger Institute for the COVID-19 Genomics UK (COG-UK) Consortium | The Lighthouse Lab in Milton Keynes et al |
| EPI_ISL_642868 | Lighthouse Lab in Milton Keynes                                                                                                                                                  | Wellcome Sanger Institute for the COVID-19 Genomics UK (COG-UK) Consortium | The Lighthouse Lab in Milton Keynes et al |
| EPI_ISL_643006 | Lighthouse Lab in Milton Keynes                                                                                                                                                  | Wellcome Sanger Institute for the COVID-19 Genomics UK (COG-UK) Consortium | The Lighthouse Lab in Milton Keynes et al |
| EPI_ISL_643040 | Lighthouse Lab in Milton Keynes                                                                                                                                                  | Wellcome Sanger Institute for the COVID-19 Genomics UK (COG-UK) Consortium | The Lighthouse Lab in Milton Keynes et al |
| EPI_ISL_642938 | Lighthouse Lab in Milton Keynes                                                                                                                                                  | Wellcome Sanger Institute for the COVID-19 Genomics UK (COG-UK) Consortium | The Lighthouse Lab in Milton Keynes et al |
| EPI_ISL_642900 | Lighthouse Lab in Milton Keynes                                                                                                                                                  | Wellcome Sanger Institute for the COVID-19 Genomics UK (COG-UK) Consortium | The Lighthouse Lab in Milton Keynes et al |
| EPI_ISL_642961 | Lighthouse Lab in Milton Keynes                                                                                                                                                  | Wellcome Sanger Institute for the COVID-19 Genomics UK (COG-UK) Consortium | The Lighthouse Lab in Milton Keynes et al |
| EPI_ISL_643043 | Lighthouse Lab in Milton Keynes                                                                                                                                                  | Wellcome Sanger Institute for the COVID-19 Genomics UK (COG-UK) Consortium | The Lighthouse Lab in Milton Keynes et al |
| EPI_ISL_642791 | Lighthouse Lab in Milton Keynes                                                                                                                                                  | Wellcome Sanger Institute for the COVID-19 Genomics UK (COG-UK) Consortium | The Lighthouse Lab in Milton Keynes et al |
| EPI_ISL_651434 | Quadram Institute Bioscience                                                                                                                                                     | COVID-19 Genomics UK (COG-UK) Consortium                                   | Dave J. Baker et al                       |
| EPI_ISL_651079 | Quadram Institute Bioscience                                                                                                                                                     | COVID-19 Genomics UK (COG-UK) Consortium                                   | Dave J. Baker et al                       |
| EPI_ISL_650983 | Department of Pathology, University of Cambridge                                                                                                                                 | COVID-19 Genomics UK (COG-UK) Consortium                                   | Aminu S. Jahun et al                      |
| EPI_ISL_651080 | Department of Pathology, University of Cambridge                                                                                                                                 | COVID-19 Genomics UK (COG-UK) Consortium                                   | Aminu S. Jahun et al                      |
| EPI_ISL_651081 | Department of Pathology, University of Cambridge                                                                                                                                 | COVID-19 Genomics UK (COG-UK) Consortium                                   | Aminu S. Jahun et al                      |
| EPI_ISL_651435 | Department of Pathology, University of Cambridge                                                                                                                                 | COVID-19 Genomics UK (COG-UK) Consortium                                   | Aminu S. Jahun et al                      |
| EPI_ISL_650564 | Department of Pathology, University of Cambridge                                                                                                                                 | COVID-19 Genomics UK (COG-UK) Consortium                                   | Aminu S. Jahun et al                      |
| EPI_ISL_650609 | Department of Pathology, University of Cambridge                                                                                                                                 | COVID-19 Genomics UK (COG-UK) Consortium                                   | Aminu S. Jahun et al                      |
| EPI_ISL_650553 | Department of Pathology, University of Cambridge                                                                                                                                 | COVID-19 Genomics UK (COG-UK) Consortium                                   | Aminu S. Jahun et al                      |
| EPI_ISL_637594 | Virology Department, Sheffield Teaching Hospitals NHS Foundation Trust/Department of Infection, Immunity and Cardiovascular Disease, The Medical School, University of Sheffield | COVID-19 Genomics UK (COG-UK) Consortium                                   | Thushan de Silva et al                    |
| EPI_ISL_650209 | Virology Department, Sheffield Teaching Hospitals NHS Foundation Trust/Department of Infection, Immunity and Cardiovascular Disease, The Medical School, University of Sheffield | COVID-19 Genomics UK (COG-UK) Consortium                                   | Thushan de Silva et al                    |



|                |                                                                                                                                                                                  |                                                                            |                                           |
|----------------|----------------------------------------------------------------------------------------------------------------------------------------------------------------------------------|----------------------------------------------------------------------------|-------------------------------------------|
| EPI_ISL_650675 | Virology Department, Sheffield Teaching Hospitals NHS Foundation Trust/Department of Infection, Immunity and Cardiovascular Disease, The Medical School, University of Sheffield | COVID-19 Genomics UK (COG-UK) Consortium                                   | Thushan de Silva et al                    |
| EPI_ISL_650556 | Queens Medical Centre, Clinical Microbiology Department / DeepSeq Nottingham                                                                                                     | COVID-19 Genomics UK (COG-UK) Consortium                                   | Gemma Clark et al                         |
| EPI_ISL_650846 | Queens Medical Centre, Clinical Microbiology Department / DeepSeq Nottingham                                                                                                     | COVID-19 Genomics UK (COG-UK) Consortium                                   | Gemma Clark et al                         |
| EPI_ISL_650409 | Quadram Institute Bioscience                                                                                                                                                     | COVID-19 Genomics UK (COG-UK) Consortium                                   | Dave J. Baker et al                       |
| EPI_ISL_642828 | Lighthouse Lab in Milton Keynes                                                                                                                                                  | Wellcome Sanger Institute for the COVID-19 Genomics UK (COG-UK) Consortium | The Lighthouse Lab in Milton Keynes et al |
| EPI_ISL_643027 | Lighthouse Lab in Milton Keynes                                                                                                                                                  | Wellcome Sanger Institute for the COVID-19 Genomics UK (COG-UK) Consortium | The Lighthouse Lab in Milton Keynes et al |
| EPI_ISL_651082 | Quadram Institute Bioscience                                                                                                                                                     | COVID-19 Genomics UK (COG-UK) Consortium                                   | Dave J. Baker et al                       |
| EPI_ISL_651438 | Quadram Institute Bioscience                                                                                                                                                     | COVID-19 Genomics UK (COG-UK) Consortium                                   | Dave J. Baker et al                       |
| EPI_ISL_650761 | Quadram Institute Bioscience                                                                                                                                                     | COVID-19 Genomics UK (COG-UK) Consortium                                   | Dave J. Baker et al                       |
| EPI_ISL_650765 | Quadram Institute Bioscience                                                                                                                                                     | COVID-19 Genomics UK (COG-UK) Consortium                                   | Dave J. Baker et al                       |
| EPI_ISL_650325 | Quadram Institute Bioscience                                                                                                                                                     | COVID-19 Genomics UK (COG-UK) Consortium                                   | Dave J. Baker et al                       |
| EPI_ISL_658850 | Lighthouse Lab in Milton Keynes                                                                                                                                                  | Wellcome Sanger Institute for the COVID-19 Genomics UK (COG-UK) Consortium | The Lighthouse Lab in Milton Keynes et al |
| EPI_ISL_658907 | Lighthouse Lab in Milton Keynes                                                                                                                                                  | Wellcome Sanger Institute for the COVID-19 Genomics UK (COG-UK) Consortium | The Lighthouse Lab in Milton Keynes et al |
| EPI_ISL_659057 | Lighthouse Lab in Milton Keynes                                                                                                                                                  | Wellcome Sanger Institute for the COVID-19 Genomics UK (COG-UK) Consortium | The Lighthouse Lab in Milton Keynes et al |
| EPI_ISL_658848 | Lighthouse Lab in Milton Keynes                                                                                                                                                  | Wellcome Sanger Institute for the COVID-19 Genomics UK (COG-UK) Consortium | The Lighthouse Lab in Milton Keynes et al |
| EPI_ISL_659067 | Lighthouse Lab in Milton Keynes                                                                                                                                                  | Wellcome Sanger Institute for the COVID-19 Genomics UK (COG-UK) Consortium | The Lighthouse Lab in Milton Keynes et al |
| EPI_ISL_659022 | Lighthouse Lab in Milton Keynes                                                                                                                                                  | Wellcome Sanger Institute for the COVID-19 Genomics UK (COG-UK) Consortium | The Lighthouse Lab in Milton Keynes et al |
| EPI_ISL_659086 | Lighthouse Lab in Milton Keynes                                                                                                                                                  | Wellcome Sanger Institute for the COVID-19 Genomics UK (COG-UK) Consortium | The Lighthouse Lab in Milton Keynes et al |
| EPI_ISL_658945 | Lighthouse Lab in Milton Keynes                                                                                                                                                  | Wellcome Sanger Institute for the COVID-19 Genomics UK (COG-UK) Consortium | The Lighthouse Lab in Milton Keynes et al |
| EPI_ISL_658969 | Lighthouse Lab in Milton Keynes                                                                                                                                                  | Wellcome Sanger Institute for the COVID-19 Genomics UK (COG-UK) Consortium | The Lighthouse Lab in Milton Keynes et al |
| EPI_ISL_658748 | Lighthouse Lab in Milton Keynes                                                                                                                                                  | Wellcome Sanger Institute for the COVID-19 Genomics UK (COG-UK) Consortium | The Lighthouse Lab in Milton Keynes et al |
| EPI_ISL_658796 | Lighthouse Lab in Milton Keynes                                                                                                                                                  | Wellcome Sanger Institute for the COVID-19 Genomics UK (COG-UK) Consortium | The Lighthouse Lab in Milton Keynes et al |
| EPI_ISL_651083 | University of Exeter                                                                                                                                                             | COVID-19 Genomics UK (COG-UK) Consortium                                   | Ben Temperton et al                       |
| EPI_ISL_650565 | University of Exeter                                                                                                                                                             | COVID-19 Genomics UK (COG-UK) Consortium                                   | Ben Temperton et al                       |
| EPI_ISL_650606 | University of Exeter                                                                                                                                                             | COVID-19 Genomics UK (COG-UK) Consortium                                   | Ben Temperton et al                       |
| EPI_ISL_651084 | University of Exeter                                                                                                                                                             | COVID-19 Genomics UK (COG-UK) Consortium                                   | Ben Temperton et al                       |
| EPI_ISL_650151 | University of Exeter                                                                                                                                                             | COVID-19 Genomics UK (COG-UK) Consortium                                   | Ben Temperton et al                       |
| EPI_ISL_650352 | University of Exeter                                                                                                                                                             | COVID-19 Genomics UK (COG-UK) Consortium                                   | Ben Temperton et al                       |
| EPI_ISL_659075 | Lighthouse Lab in Milton Keynes                                                                                                                                                  | Wellcome Sanger Institute for the COVID-19 Genomics UK (COG-UK) Consortium | The Lighthouse Lab in Milton Keynes et al |
| EPI_ISL_658946 | Lighthouse Lab in Milton Keynes                                                                                                                                                  | Wellcome Sanger Institute for the COVID-19 Genomics UK (COG-UK) Consortium | The Lighthouse Lab in Milton Keynes et al |
| EPI_ISL_651439 | University of Exeter                                                                                                                                                             | COVID-19 Genomics UK (COG-UK) Consortium                                   | Ben Temperton et al                       |
| EPI_ISL_658824 | Lighthouse Lab in Milton Keynes                                                                                                                                                  | Wellcome Sanger Institute for the COVID-19 Genomics UK (COG-UK) Consortium | The Lighthouse Lab in Milton Keynes et al |
| EPI_ISL_679641 | Oxford Viromics, NDM, University of Oxford; Oxford University Hospitals; Basingstoke and North Hampshire Hospital                                                                | COVID-19 Genomics UK (COG-UK) Consortium                                   | Tanya Golubchik et al                     |
| EPI_ISL_679651 | Oxford Viromics, NDM, University of Oxford; Oxford University Hospitals; Basingstoke and North Hampshire Hospital                                                                | COVID-19 Genomics UK (COG-UK) Consortium                                   | Tanya Golubchik et al                     |

























|                |                                                                                                                            |                                                                            |                            |
|----------------|----------------------------------------------------------------------------------------------------------------------------|----------------------------------------------------------------------------|----------------------------|
| EPI_ISL_665596 | Quadram Institute Bioscience                                                                                               | COVID-19 Genomics UK (COG-UK) Consortium                                   | Dave J. Baker et al        |
| EPI_ISL_665295 | Quadram Institute Bioscience                                                                                               | COVID-19 Genomics UK (COG-UK) Consortium                                   | Dave J. Baker et al        |
| EPI_ISL_704772 | Quadram Institute Bioscience                                                                                               | COVID-19 Genomics UK (COG-UK) Consortium                                   | Dave J. Baker et al        |
| EPI_ISL_704802 | Quadram Institute Bioscience                                                                                               | COVID-19 Genomics UK (COG-UK) Consortium                                   | Dave J. Baker et al        |
| EPI_ISL_704777 | Quadram Institute Bioscience                                                                                               | COVID-19 Genomics UK (COG-UK) Consortium                                   | Dave J. Baker et al        |
| EPI_ISL_549376 | Queens Medical Centre, Clinical Microbiology Department / DeepSeq Nottingham                                               | COVID-19 Genomics UK (COG-UK) Consortium                                   | Gemma Clark et al          |
| EPI_ISL_549375 | Lincolnshire Hospitals and DeepSeq Nottingham                                                                              | COVID-19 Genomics UK (COG-UK) Consortium                                   | Nichola Duckworth et al    |
| EPI_ISL_572872 | Queens Medical Centre, Clinical Microbiology Department / DeepSeq Nottingham                                               | COVID-19 Genomics UK (COG-UK) Consortium                                   | Gemma Clark et al          |
| EPI_ISL_584777 | Queens Medical Centre, Clinical Microbiology Department / DeepSeq Nottingham                                               | COVID-19 Genomics UK (COG-UK) Consortium                                   | Gemma Clark et al          |
| EPI_ISL_627215 | Queens Medical Centre, Clinical Microbiology Department / DeepSeq Nottingham                                               | COVID-19 Genomics UK (COG-UK) Consortium                                   | Gemma Clark et al          |
| EPI_ISL_627216 | Queens Medical Centre, Clinical Microbiology Department / DeepSeq Nottingham                                               | COVID-19 Genomics UK (COG-UK) Consortium                                   | Gemma Clark et al          |
| EPI_ISL_679947 | Lincolnshire Hospitals and DeepSeq Nottingham                                                                              | COVID-19 Genomics UK (COG-UK) Consortium                                   | Nichola Duckworth et al    |
| EPI_ISL_704780 | Queens Medical Centre, Clinical Microbiology Department / DeepSeq Nottingham                                               | COVID-19 Genomics UK (COG-UK) Consortium                                   | Gemma Clark et al          |
| EPI_ISL_577213 | Centre for Enzyme Innovation, University of Portsmouth / Translational Research Laboratory, Portsmouth Hospitals NHS Trust | COVID-19 Genomics UK (COG-UK) Consortium                                   | Angela Beckett et al       |
| EPI_ISL_679974 | Centre for Enzyme Innovation, University of Portsmouth / Translational Research Laboratory, Portsmouth Hospitals NHS Trust | COVID-19 Genomics UK (COG-UK) Consortium                                   | Angela Beckett et al       |
| EPI_ISL_531939 | Lighthouse Lab in Glasgow                                                                                                  | Wellcome Sanger Institute for the COVID-19 Genomics UK (COG-UK) consortium | Harper VanSteenhouse et al |
| EPI_ISL_531770 | Lighthouse Lab in Glasgow                                                                                                  | Wellcome Sanger Institute for the COVID-19 Genomics UK (COG-UK) consortium | Harper VanSteenhouse et al |
| EPI_ISL_536922 | Lighthouse Lab in Glasgow                                                                                                  | Wellcome Sanger Institute for the COVID-19 Genomics UK (COG-UK) consortium | Harper VanSteenhouse et al |
| EPI_ISL_531540 | Lighthouse Lab in Glasgow                                                                                                  | Wellcome Sanger Institute for the COVID-19 Genomics UK (COG-UK) consortium | Harper VanSteenhouse et al |
| EPI_ISL_530558 | Lighthouse Lab in Glasgow                                                                                                  | Wellcome Sanger Institute for the COVID-19 Genomics UK (COG-UK) consortium | Harper VanSteenhouse et al |
| EPI_ISL_530491 | Lighthouse Lab in Glasgow                                                                                                  | Wellcome Sanger Institute for the COVID-19 Genomics UK (COG-UK) consortium | Harper VanSteenhouse et al |
| EPI_ISL_530543 | Lighthouse Lab in Glasgow                                                                                                  | Wellcome Sanger Institute for the COVID-19 Genomics UK (COG-UK) consortium | Harper VanSteenhouse et al |
| EPI_ISL_540237 | Lighthouse Lab in Glasgow                                                                                                  | Wellcome Sanger Institute for the COVID-19 Genomics UK (COG-UK) consortium | Harper VanSteenhouse et al |
| EPI_ISL_540308 | Lighthouse Lab in Glasgow                                                                                                  | Wellcome Sanger Institute for the COVID-19 Genomics UK (COG-UK) consortium | Harper VanSteenhouse et al |
| EPI_ISL_540238 | Lighthouse Lab in Glasgow                                                                                                  | Wellcome Sanger Institute for the COVID-19 Genomics UK (COG-UK) consortium | Harper VanSteenhouse et al |
| EPI_ISL_540347 | Lighthouse Lab in Glasgow                                                                                                  | Wellcome Sanger Institute for the COVID-19 Genomics UK (COG-UK) consortium | Harper VanSteenhouse et al |
| EPI_ISL_540403 | Lighthouse Lab in Glasgow                                                                                                  | Wellcome Sanger Institute for the COVID-19 Genomics UK (COG-UK) consortium | Harper VanSteenhouse et al |
| EPI_ISL_540089 | Lighthouse Lab in Glasgow                                                                                                  | Wellcome Sanger Institute for the COVID-19 Genomics UK (COG-UK) consortium | Harper VanSteenhouse et al |
| EPI_ISL_539989 | Lighthouse Lab in Glasgow                                                                                                  | Wellcome Sanger Institute for the COVID-19 Genomics UK (COG-UK) consortium | Harper VanSteenhouse et al |
| EPI_ISL_540028 | Lighthouse Lab in Glasgow                                                                                                  | Wellcome Sanger Institute for the COVID-19 Genomics UK (COG-UK) consortium | Harper VanSteenhouse et al |
| EPI_ISL_540063 | Lighthouse Lab in Glasgow                                                                                                  | Wellcome Sanger Institute for the COVID-19 Genomics UK (COG-UK) consortium | Harper VanSteenhouse et al |
| EPI_ISL_549345 | Oxford Viromics, NDM, University of Oxford; Oxford University Hospitals; Basingstoke and North Hampshire Hospital          | COVID-19 Genomics UK (COG-UK) Consortium                                   | Tanya Golubchik et al      |
| EPI_ISL_549346 | Oxford Viromics, NDM, University of Oxford; Oxford University Hospitals; Basingstoke and North Hampshire Hospital          | COVID-19 Genomics UK (COG-UK) Consortium                                   | Tanya Golubchik et al      |

|                |                                                                                                                                                                                  |                                                                            |                            |
|----------------|----------------------------------------------------------------------------------------------------------------------------------------------------------------------------------|----------------------------------------------------------------------------|----------------------------|
| EPI_ISL_559756 | Oxford Viromics, NDM, University of Oxford; Oxford University Hospitals; Basingstoke and North Hampshire Hospital                                                                | COVID-19 Genomics UK (COG-UK) Consortium                                   | Tanya Golubchik et al      |
| EPI_ISL_537201 | Lighthouse Lab in Glasgow                                                                                                                                                        | Wellcome Sanger Institute for the COVID-19 Genomics UK (COG-UK) consortium | Harper VanSteenhouse et al |
| EPI_ISL_540012 | Lighthouse Lab in Glasgow                                                                                                                                                        | Wellcome Sanger Institute for the COVID-19 Genomics UK (COG-UK) consortium | Harper VanSteenhouse et al |
| EPI_ISL_539940 | Lighthouse Lab in Glasgow                                                                                                                                                        | Wellcome Sanger Institute for the COVID-19 Genomics UK (COG-UK) consortium | Harper VanSteenhouse et al |
| EPI_ISL_539942 | Lighthouse Lab in Glasgow                                                                                                                                                        | Wellcome Sanger Institute for the COVID-19 Genomics UK (COG-UK) consortium | Harper VanSteenhouse et al |
| EPI_ISL_540099 | Lighthouse Lab in Glasgow                                                                                                                                                        | Wellcome Sanger Institute for the COVID-19 Genomics UK (COG-UK) consortium | Harper VanSteenhouse et al |
| EPI_ISL_540014 | Lighthouse Lab in Glasgow                                                                                                                                                        | Wellcome Sanger Institute for the COVID-19 Genomics UK (COG-UK) consortium | Harper VanSteenhouse et al |
| EPI_ISL_541823 | Lighthouse Lab in Glasgow                                                                                                                                                        | Wellcome Sanger Institute for the COVID-19 Genomics UK (COG-UK) consortium | Harper VanSteenhouse et al |
| EPI_ISL_541786 | Lighthouse Lab in Glasgow                                                                                                                                                        | Wellcome Sanger Institute for the COVID-19 Genomics UK (COG-UK) consortium | Harper VanSteenhouse et al |
| EPI_ISL_559787 | Oxford Viromics, NDM, University of Oxford; Oxford University Hospitals; Basingstoke and North Hampshire Hospital                                                                | COVID-19 Genomics UK (COG-UK) Consortium                                   | Tanya Golubchik et al      |
| EPI_ISL_559790 | Oxford Viromics, NDM, University of Oxford; Oxford University Hospitals; Basingstoke and North Hampshire Hospital                                                                | COVID-19 Genomics UK (COG-UK) Consortium                                   | Tanya Golubchik et al      |
| EPI_ISL_559795 | Oxford Viromics, NDM, University of Oxford; Oxford University Hospitals; Basingstoke and North Hampshire Hospital                                                                | COVID-19 Genomics UK (COG-UK) Consortium                                   | Tanya Golubchik et al      |
| EPI_ISL_637282 | Department of Pathology, University of Cambridge                                                                                                                                 | COVID-19 Genomics UK (COG-UK) Consortium                                   | Aminu S. Jahun et al       |
| EPI_ISL_638079 | Department of Pathology, University of Cambridge                                                                                                                                 | COVID-19 Genomics UK (COG-UK) Consortium                                   | Aminu S. Jahun et al       |
| EPI_ISL_577238 | University of Exeter                                                                                                                                                             | COVID-19 Genomics UK (COG-UK) Consortium                                   | Ben Temperton et al        |
| EPI_ISL_577252 | University of Exeter                                                                                                                                                             | COVID-19 Genomics UK (COG-UK) Consortium                                   | Ben Temperton et al        |
| EPI_ISL_559842 | Oxford Viromics, NDM, University of Oxford; Oxford University Hospitals; Basingstoke and North Hampshire Hospital                                                                | COVID-19 Genomics UK (COG-UK) Consortium                                   | Tanya Golubchik et al      |
| EPI_ISL_559848 | Oxford Viromics, NDM, University of Oxford; Oxford University Hospitals; Basingstoke and North Hampshire Hospital                                                                | COVID-19 Genomics UK (COG-UK) Consortium                                   | Tanya Golubchik et al      |
| EPI_ISL_572619 | Virology Department, Sheffield Teaching Hospitals NHS Foundation Trust/Department of Infection, Immunity and Cardiovascular Disease, The Medical School, University of Sheffield | COVID-19 Genomics UK (COG-UK) Consortium                                   | Thushan de Silva et al     |
| EPI_ISL_559885 | Oxford Viromics, NDM, University of Oxford; Oxford University Hospitals; Basingstoke and North Hampshire Hospital                                                                | COVID-19 Genomics UK (COG-UK) Consortium                                   | Tanya Golubchik et al      |
| EPI_ISL_559887 | Oxford Viromics, NDM, University of Oxford; Oxford University Hospitals; Basingstoke and North Hampshire Hospital                                                                | COVID-19 Genomics UK (COG-UK) Consortium                                   | Tanya Golubchik et al      |
| EPI_ISL_559893 | Oxford Viromics, NDM, University of Oxford; Oxford University Hospitals; Basingstoke and North Hampshire Hospital                                                                | COVID-19 Genomics UK (COG-UK) Consortium                                   | Tanya Golubchik et al      |
| EPI_ISL_590231 | Lighthouse Lab in Glasgow                                                                                                                                                        | Wellcome Sanger Institute for the COVID-19 Genomics UK (COG-UK) consortium | Harper VanSteenhouse et al |
| EPI_ISL_590340 | Lighthouse Lab in Glasgow                                                                                                                                                        | Wellcome Sanger Institute for the COVID-19 Genomics UK (COG-UK) consortium | Harper VanSteenhouse et al |
| EPI_ISL_590211 | Lighthouse Lab in Glasgow                                                                                                                                                        | Wellcome Sanger Institute for the COVID-19 Genomics UK (COG-UK) consortium | Harper VanSteenhouse et al |
| EPI_ISL_590280 | Lighthouse Lab in Glasgow                                                                                                                                                        | Wellcome Sanger Institute for the COVID-19 Genomics UK (COG-UK) consortium | Harper VanSteenhouse et al |
| EPI_ISL_590191 | Lighthouse Lab in Glasgow                                                                                                                                                        | Wellcome Sanger Institute for the COVID-19 Genomics UK (COG-UK) consortium | Harper VanSteenhouse et al |
| EPI_ISL_590381 | Lighthouse Lab in Glasgow                                                                                                                                                        | Wellcome Sanger Institute for the COVID-19 Genomics UK (COG-UK) consortium | Harper VanSteenhouse et al |
| EPI_ISL_602099 | Lighthouse Lab in Glasgow                                                                                                                                                        | Wellcome Sanger Institute for the COVID-19 Genomics UK (COG-UK) consortium | Harper VanSteenhouse et al |
| EPI_ISL_590558 | Lighthouse Lab in Glasgow                                                                                                                                                        | Wellcome Sanger Institute for the COVID-19 Genomics UK (COG-UK) consortium | Harper VanSteenhouse et al |
| EPI_ISL_590578 | Lighthouse Lab in Glasgow                                                                                                                                                        | Wellcome Sanger Institute for the COVID-19 Genomics UK (COG-UK) consortium | Harper VanSteenhouse et al |

|                |                                                                                                                   |                                                                            |                            |
|----------------|-------------------------------------------------------------------------------------------------------------------|----------------------------------------------------------------------------|----------------------------|
| EPI_ISL_549562 | Lighthouse Lab in Glasgow                                                                                         | Wellcome Sanger Institute for the COVID-19 Genomics UK (COG-UK) consortium | Harper VanSteenhouse et al |
| EPI_ISL_549685 | Lighthouse Lab in Glasgow                                                                                         | Wellcome Sanger Institute for the COVID-19 Genomics UK (COG-UK) consortium | Harper VanSteenhouse et al |
| EPI_ISL_572873 | Oxford Viromics, NDM, University of Oxford; Oxford University Hospitals; Basingstoke and North Hampshire Hospital | COVID-19 Genomics UK (COG-UK) Consortium                                   | Tanya Golubchik et al      |
| EPI_ISL_567052 | Lighthouse Lab in Glasgow                                                                                         | Wellcome Sanger Institute for the COVID-19 Genomics UK (COG-UK) consortium | Harper VanSteenhouse et al |
| EPI_ISL_567148 | Lighthouse Lab in Glasgow                                                                                         | Wellcome Sanger Institute for the COVID-19 Genomics UK (COG-UK) consortium | Harper VanSteenhouse et al |
| EPI_ISL_567060 | Lighthouse Lab in Glasgow                                                                                         | Wellcome Sanger Institute for the COVID-19 Genomics UK (COG-UK) consortium | Harper VanSteenhouse et al |
| EPI_ISL_567043 | Lighthouse Lab in Glasgow                                                                                         | Wellcome Sanger Institute for the COVID-19 Genomics UK (COG-UK) consortium | Harper VanSteenhouse et al |
| EPI_ISL_567084 | Lighthouse Lab in Glasgow                                                                                         | Wellcome Sanger Institute for the COVID-19 Genomics UK (COG-UK) consortium | Harper VanSteenhouse et al |
| EPI_ISL_567095 | Lighthouse Lab in Glasgow                                                                                         | Wellcome Sanger Institute for the COVID-19 Genomics UK (COG-UK) consortium | Harper VanSteenhouse et al |
| EPI_ISL_567047 | Lighthouse Lab in Glasgow                                                                                         | Wellcome Sanger Institute for the COVID-19 Genomics UK (COG-UK) consortium | Harper VanSteenhouse et al |
| EPI_ISL_567297 | Lighthouse Lab in Glasgow                                                                                         | Wellcome Sanger Institute for the COVID-19 Genomics UK (COG-UK) consortium | Harper VanSteenhouse et al |
| EPI_ISL_567507 | Lighthouse Lab in Glasgow                                                                                         | Wellcome Sanger Institute for the COVID-19 Genomics UK (COG-UK) consortium | Harper VanSteenhouse et al |
| EPI_ISL_567431 | Lighthouse Lab in Glasgow                                                                                         | Wellcome Sanger Institute for the COVID-19 Genomics UK (COG-UK) consortium | Harper VanSteenhouse et al |
| EPI_ISL_567300 | Lighthouse Lab in Glasgow                                                                                         | Wellcome Sanger Institute for the COVID-19 Genomics UK (COG-UK) consortium | Harper VanSteenhouse et al |
| EPI_ISL_567428 | Lighthouse Lab in Glasgow                                                                                         | Wellcome Sanger Institute for the COVID-19 Genomics UK (COG-UK) consortium | Harper VanSteenhouse et al |
| EPI_ISL_567517 | Lighthouse Lab in Glasgow                                                                                         | Wellcome Sanger Institute for the COVID-19 Genomics UK (COG-UK) consortium | Harper VanSteenhouse et al |
| EPI_ISL_590050 | Lighthouse Lab in Glasgow                                                                                         | Wellcome Sanger Institute for the COVID-19 Genomics UK (COG-UK) consortium | Harper VanSteenhouse et al |
| EPI_ISL_590162 | Lighthouse Lab in Glasgow                                                                                         | Wellcome Sanger Institute for the COVID-19 Genomics UK (COG-UK) consortium | Harper VanSteenhouse et al |
| EPI_ISL_590042 | Lighthouse Lab in Glasgow                                                                                         | Wellcome Sanger Institute for the COVID-19 Genomics UK (COG-UK) consortium | Harper VanSteenhouse et al |
| EPI_ISL_589860 | Lighthouse Lab in Glasgow                                                                                         | Wellcome Sanger Institute for the COVID-19 Genomics UK (COG-UK) consortium | Harper VanSteenhouse et al |
| EPI_ISL_589949 | Lighthouse Lab in Glasgow                                                                                         | Wellcome Sanger Institute for the COVID-19 Genomics UK (COG-UK) consortium | Harper VanSteenhouse et al |
| EPI_ISL_589934 | Lighthouse Lab in Glasgow                                                                                         | Wellcome Sanger Institute for the COVID-19 Genomics UK (COG-UK) consortium | Harper VanSteenhouse et al |
| EPI_ISL_590015 | Lighthouse Lab in Glasgow                                                                                         | Wellcome Sanger Institute for the COVID-19 Genomics UK (COG-UK) consortium | Harper VanSteenhouse et al |
| EPI_ISL_589928 | Lighthouse Lab in Glasgow                                                                                         | Wellcome Sanger Institute for the COVID-19 Genomics UK (COG-UK) consortium | Harper VanSteenhouse et al |
| EPI_ISL_589999 | Lighthouse Lab in Glasgow                                                                                         | Wellcome Sanger Institute for the COVID-19 Genomics UK (COG-UK) consortium | Harper VanSteenhouse et al |
| EPI_ISL_589871 | Lighthouse Lab in Glasgow                                                                                         | Wellcome Sanger Institute for the COVID-19 Genomics UK (COG-UK) consortium | Harper VanSteenhouse et al |
| EPI_ISL_577286 | University of Exeter                                                                                              | COVID-19 Genomics UK (COG-UK) Consortium                                   | Ben Temperton et al        |
| EPI_ISL_601459 | Lighthouse Lab in Glasgow                                                                                         | Wellcome Sanger Institute for the COVID-19 Genomics UK (COG-UK) consortium | Harper VanSteenhouse et al |
| EPI_ISL_601250 | Lighthouse Lab in Glasgow                                                                                         | Wellcome Sanger Institute for the COVID-19 Genomics UK (COG-UK) consortium | Harper VanSteenhouse et al |
| EPI_ISL_581080 | Lighthouse Lab in Glasgow                                                                                         | Wellcome Sanger Institute for the COVID-19 Genomics UK (COG-UK) consortium | Harper VanSteenhouse et al |
| EPI_ISL_599570 | Lighthouse Lab in Glasgow                                                                                         | Wellcome Sanger Institute for the COVID-19 Genomics UK (COG-UK) consortium | Harper VanSteenhouse et al |

|                |                                                                                                                                                                                                                     |                                                                            |                            |
|----------------|---------------------------------------------------------------------------------------------------------------------------------------------------------------------------------------------------------------------|----------------------------------------------------------------------------|----------------------------|
| EPI_ISL_599766 | Lighthouse Lab in Glasgow                                                                                                                                                                                           | Wellcome Sanger Institute for the COVID-19 Genomics UK (COG-UK) consortium | Harper VanSteenhouse et al |
| EPI_ISL_599748 | Lighthouse Lab in Glasgow                                                                                                                                                                                           | Wellcome Sanger Institute for the COVID-19 Genomics UK (COG-UK) consortium | Harper VanSteenhouse et al |
| EPI_ISL_599544 | Lighthouse Lab in Glasgow                                                                                                                                                                                           | Wellcome Sanger Institute for the COVID-19 Genomics UK (COG-UK) consortium | Harper VanSteenhouse et al |
| EPI_ISL_599759 | Lighthouse Lab in Glasgow                                                                                                                                                                                           | Wellcome Sanger Institute for the COVID-19 Genomics UK (COG-UK) consortium | Harper VanSteenhouse et al |
| EPI_ISL_581334 | Lighthouse Lab in Glasgow                                                                                                                                                                                           | Wellcome Sanger Institute for the COVID-19 Genomics UK (COG-UK) consortium | Harper VanSteenhouse et al |
| EPI_ISL_584852 | Northumbria University / South Tees Hospitals NHS Foundation Trust / North Cumbria Integrated Care NHS Foundation Trust / North Tees and Hartlepool NHS Foundation Trust / Newcastle Hospitals NHS Foundation Trust | COVID-19 Genomics UK (COG-UK) Consortium                                   | Darren L Smith et al       |
| EPI_ISL_584855 | Northumbria University / South Tees Hospitals NHS Foundation Trust / North Cumbria Integrated Care NHS Foundation Trust / North Tees and Hartlepool NHS Foundation Trust / Newcastle Hospitals NHS Foundation Trust | COVID-19 Genomics UK (COG-UK) Consortium                                   | Darren L Smith et al       |
| EPI_ISL_579791 | Lighthouse Lab in Glasgow                                                                                                                                                                                           | Wellcome Sanger Institute for the COVID-19 Genomics UK (COG-UK) consortium | Harper VanSteenhouse et al |
| EPI_ISL_579771 | Lighthouse Lab in Glasgow                                                                                                                                                                                           | Wellcome Sanger Institute for the COVID-19 Genomics UK (COG-UK) consortium | Harper VanSteenhouse et al |
| EPI_ISL_579800 | Lighthouse Lab in Glasgow                                                                                                                                                                                           | Wellcome Sanger Institute for the COVID-19 Genomics UK (COG-UK) consortium | Harper VanSteenhouse et al |
| EPI_ISL_579772 | Lighthouse Lab in Glasgow                                                                                                                                                                                           | Wellcome Sanger Institute for the COVID-19 Genomics UK (COG-UK) consortium | Harper VanSteenhouse et al |
| EPI_ISL_600786 | Lighthouse Lab in Glasgow                                                                                                                                                                                           | Wellcome Sanger Institute for the COVID-19 Genomics UK (COG-UK) consortium | Harper VanSteenhouse et al |
| EPI_ISL_588681 | Lighthouse Lab in Glasgow                                                                                                                                                                                           | Wellcome Sanger Institute for the COVID-19 Genomics UK (COG-UK) consortium | Harper VanSteenhouse et al |
| EPI_ISL_588530 | Lighthouse Lab in Glasgow                                                                                                                                                                                           | Wellcome Sanger Institute for the COVID-19 Genomics UK (COG-UK) consortium | Harper VanSteenhouse et al |
| EPI_ISL_588632 | Lighthouse Lab in Glasgow                                                                                                                                                                                           | Wellcome Sanger Institute for the COVID-19 Genomics UK (COG-UK) consortium | Harper VanSteenhouse et al |
| EPI_ISL_638080 | Department of Pathology, University of Cambridge                                                                                                                                                                    | COVID-19 Genomics UK (COG-UK) Consortium                                   | Aminu S. Jahun et al       |
| EPI_ISL_638081 | Department of Pathology, University of Cambridge                                                                                                                                                                    | COVID-19 Genomics UK (COG-UK) Consortium                                   | Aminu S. Jahun et al       |
| EPI_ISL_638082 | Department of Pathology, University of Cambridge                                                                                                                                                                    | COVID-19 Genomics UK (COG-UK) Consortium                                   | Aminu S. Jahun et al       |
| EPI_ISL_638083 | Department of Pathology, University of Cambridge                                                                                                                                                                    | COVID-19 Genomics UK (COG-UK) Consortium                                   | Aminu S. Jahun et al       |
| EPI_ISL_588396 | Lighthouse Lab in Glasgow                                                                                                                                                                                           | Wellcome Sanger Institute for the COVID-19 Genomics UK (COG-UK) consortium | Harper VanSteenhouse et al |
| EPI_ISL_588969 | Lighthouse Lab in Glasgow                                                                                                                                                                                           | Wellcome Sanger Institute for the COVID-19 Genomics UK (COG-UK) consortium | Harper VanSteenhouse et al |
| EPI_ISL_588897 | Lighthouse Lab in Glasgow                                                                                                                                                                                           | Wellcome Sanger Institute for the COVID-19 Genomics UK (COG-UK) consortium | Harper VanSteenhouse et al |
| EPI_ISL_588373 | Lighthouse Lab in Glasgow                                                                                                                                                                                           | Wellcome Sanger Institute for the COVID-19 Genomics UK (COG-UK) consortium | Harper VanSteenhouse et al |
| EPI_ISL_595693 | Oxford Viromics, NDM, University of Oxford; Oxford University Hospitals; Basingstoke and North Hampshire Hospital                                                                                                   | COVID-19 Genomics UK (COG-UK) Consortium                                   | Tanya Golubchik et al      |
| EPI_ISL_588945 | Lighthouse Lab in Glasgow                                                                                                                                                                                           | Wellcome Sanger Institute for the COVID-19 Genomics UK (COG-UK) consortium | Harper VanSteenhouse et al |
| EPI_ISL_588901 | Lighthouse Lab in Glasgow                                                                                                                                                                                           | Wellcome Sanger Institute for the COVID-19 Genomics UK (COG-UK) consortium | Harper VanSteenhouse et al |
| EPI_ISL_589223 | Lighthouse Lab in Glasgow                                                                                                                                                                                           | Wellcome Sanger Institute for the COVID-19 Genomics UK (COG-UK) consortium | Harper VanSteenhouse et al |
| EPI_ISL_589119 | Lighthouse Lab in Glasgow                                                                                                                                                                                           | Wellcome Sanger Institute for the COVID-19 Genomics UK (COG-UK) consortium | Harper VanSteenhouse et al |
| EPI_ISL_589151 | Lighthouse Lab in Glasgow                                                                                                                                                                                           | Wellcome Sanger Institute for the COVID-19 Genomics UK (COG-UK) consortium | Harper VanSteenhouse et al |
| EPI_ISL_595769 | Oxford Viromics, NDM, University of Oxford; Oxford University Hospitals; Basingstoke and North Hampshire Hospital                                                                                                   | COVID-19 Genomics UK (COG-UK) Consortium                                   | Tanya Golubchik et al      |



|                |                                                                                                                                                                                  |                                                                            |                            |
|----------------|----------------------------------------------------------------------------------------------------------------------------------------------------------------------------------|----------------------------------------------------------------------------|----------------------------|
| EPI_ISL_595781 | Oxford Viromics, NDM, University of Oxford; Oxford University Hospitals; Basingstoke and North Hampshire Hospital                                                                | COVID-19 Genomics UK (COG-UK) Consortium                                   | Tanya Golubchik et al      |
| EPI_ISL_595783 | Oxford Viromics, NDM, University of Oxford; Oxford University Hospitals; Basingstoke and North Hampshire Hospital                                                                | COVID-19 Genomics UK (COG-UK) Consortium                                   | Tanya Golubchik et al      |
| EPI_ISL_595785 | Oxford Viromics, NDM, University of Oxford; Oxford University Hospitals; Basingstoke and North Hampshire Hospital                                                                | COVID-19 Genomics UK (COG-UK) Consortium                                   | Tanya Golubchik et al      |
| EPI_ISL_588145 | Lighthouse Lab in Glasgow                                                                                                                                                        | Wellcome Sanger Institute for the COVID-19 Genomics UK (COG-UK) consortium | Harper VanSteenhouse et al |
| EPI_ISL_588254 | Lighthouse Lab in Glasgow                                                                                                                                                        | Wellcome Sanger Institute for the COVID-19 Genomics UK (COG-UK) consortium | Harper VanSteenhouse et al |
| EPI_ISL_588204 | Lighthouse Lab in Glasgow                                                                                                                                                        | Wellcome Sanger Institute for the COVID-19 Genomics UK (COG-UK) consortium | Harper VanSteenhouse et al |
| EPI_ISL_588116 | Lighthouse Lab in Glasgow                                                                                                                                                        | Wellcome Sanger Institute for the COVID-19 Genomics UK (COG-UK) consortium | Harper VanSteenhouse et al |
| EPI_ISL_600138 | Lighthouse Lab in Glasgow                                                                                                                                                        | Wellcome Sanger Institute for the COVID-19 Genomics UK (COG-UK) consortium | Harper VanSteenhouse et al |
| EPI_ISL_600414 | Lighthouse Lab in Glasgow                                                                                                                                                        | Wellcome Sanger Institute for the COVID-19 Genomics UK (COG-UK) consortium | Harper VanSteenhouse et al |
| EPI_ISL_600475 | Lighthouse Lab in Glasgow                                                                                                                                                        | Wellcome Sanger Institute for the COVID-19 Genomics UK (COG-UK) consortium | Harper VanSteenhouse et al |
| EPI_ISL_600271 | Lighthouse Lab in Glasgow                                                                                                                                                        | Wellcome Sanger Institute for the COVID-19 Genomics UK (COG-UK) consortium | Harper VanSteenhouse et al |
| EPI_ISL_600485 | Lighthouse Lab in Glasgow                                                                                                                                                        | Wellcome Sanger Institute for the COVID-19 Genomics UK (COG-UK) consortium | Harper VanSteenhouse et al |
| EPI_ISL_600341 | Lighthouse Lab in Glasgow                                                                                                                                                        | Wellcome Sanger Institute for the COVID-19 Genomics UK (COG-UK) consortium | Harper VanSteenhouse et al |
| EPI_ISL_600220 | Lighthouse Lab in Glasgow                                                                                                                                                        | Wellcome Sanger Institute for the COVID-19 Genomics UK (COG-UK) consortium | Harper VanSteenhouse et al |
| EPI_ISL_600509 | Lighthouse Lab in Glasgow                                                                                                                                                        | Wellcome Sanger Institute for the COVID-19 Genomics UK (COG-UK) consortium | Harper VanSteenhouse et al |
| EPI_ISL_679990 | Virology Department, Sheffield Teaching Hospitals NHS Foundation Trust/Department of Infection, Immunity and Cardiovascular Disease, The Medical School, University of Sheffield | COVID-19 Genomics UK (COG-UK) Consortium                                   | Thushan de Silva et al     |
| EPI_ISL_595840 | Quadram Institute Bioscience                                                                                                                                                     | COVID-19 Genomics UK (COG-UK) Consortium                                   | Dave J. Baker et al        |
| EPI_ISL_595841 | Quadram Institute Bioscience                                                                                                                                                     | COVID-19 Genomics UK (COG-UK) Consortium                                   | Dave J. Baker et al        |
| EPI_ISL_599454 | Lighthouse Lab in Glasgow                                                                                                                                                        | Wellcome Sanger Institute for the COVID-19 Genomics UK (COG-UK) consortium | Harper VanSteenhouse et al |
| EPI_ISL_599339 | Lighthouse Lab in Glasgow                                                                                                                                                        | Wellcome Sanger Institute for the COVID-19 Genomics UK (COG-UK) consortium | Harper VanSteenhouse et al |
| EPI_ISL_599444 | Lighthouse Lab in Glasgow                                                                                                                                                        | Wellcome Sanger Institute for the COVID-19 Genomics UK (COG-UK) consortium | Harper VanSteenhouse et al |
| EPI_ISL_599456 | Lighthouse Lab in Glasgow                                                                                                                                                        | Wellcome Sanger Institute for the COVID-19 Genomics UK (COG-UK) consortium | Harper VanSteenhouse et al |
| EPI_ISL_599221 | Lighthouse Lab in Glasgow                                                                                                                                                        | Wellcome Sanger Institute for the COVID-19 Genomics UK (COG-UK) consortium | Harper VanSteenhouse et al |
| EPI_ISL_599324 | Lighthouse Lab in Glasgow                                                                                                                                                        | Wellcome Sanger Institute for the COVID-19 Genomics UK (COG-UK) consortium | Harper VanSteenhouse et al |
| EPI_ISL_584999 | Quadram Institute Bioscience                                                                                                                                                     | COVID-19 Genomics UK (COG-UK) Consortium                                   | Dave J. Baker et al        |
| EPI_ISL_587337 | Lighthouse Lab in Glasgow                                                                                                                                                        | Wellcome Sanger Institute for the COVID-19 Genomics UK (COG-UK) consortium | Harper VanSteenhouse et al |
| EPI_ISL_587431 | Lighthouse Lab in Glasgow                                                                                                                                                        | Wellcome Sanger Institute for the COVID-19 Genomics UK (COG-UK) consortium | Harper VanSteenhouse et al |
| EPI_ISL_587578 | Lighthouse Lab in Glasgow                                                                                                                                                        | Wellcome Sanger Institute for the COVID-19 Genomics UK (COG-UK) consortium | Harper VanSteenhouse et al |
| EPI_ISL_587312 | Lighthouse Lab in Glasgow                                                                                                                                                        | Wellcome Sanger Institute for the COVID-19 Genomics UK (COG-UK) consortium | Harper VanSteenhouse et al |
| EPI_ISL_587397 | Lighthouse Lab in Glasgow                                                                                                                                                        | Wellcome Sanger Institute for the COVID-19 Genomics UK (COG-UK) consortium | Harper VanSteenhouse et al |
| EPI_ISL_587470 | Lighthouse Lab in Glasgow                                                                                                                                                        | Wellcome Sanger Institute for the COVID-19 Genomics UK (COG-UK) consortium | Harper VanSteenhouse et al |

|                |                                                                                                                                                                                                                     |                                                                            |                            |
|----------------|---------------------------------------------------------------------------------------------------------------------------------------------------------------------------------------------------------------------|----------------------------------------------------------------------------|----------------------------|
| EPI_ISL_587593 | Lighthouse Lab in Glasgow                                                                                                                                                                                           | Wellcome Sanger Institute for the COVID-19 Genomics UK (COG-UK) consortium | Harper VanSteenhouse et al |
| EPI_ISL_587594 | Lighthouse Lab in Glasgow                                                                                                                                                                                           | Wellcome Sanger Institute for the COVID-19 Genomics UK (COG-UK) consortium | Harper VanSteenhouse et al |
| EPI_ISL_626757 | Virology Department, Sheffield Teaching Hospitals NHS Foundation Trust/Department of Infection, Immunity and Cardiovascular Disease, The Medical School, University of Sheffield                                    | COVID-19 Genomics UK (COG-UK) Consortium                                   | Thushan de Silva et al     |
| EPI_ISL_638084 | Wales Specialist Virology Centre Sequencing lab: Pathogen Genomics Unit                                                                                                                                             | COVID-19 Genomics UK (COG-UK) Consortium                                   | Catherine Moore et al      |
| EPI_ISL_637347 | Wales Specialist Virology Centre Sequencing lab: Pathogen Genomics Unit                                                                                                                                             | COVID-19 Genomics UK (COG-UK) Consortium                                   | Catherine Moore et al      |
| EPI_ISL_637400 | Wales Specialist Virology Centre Sequencing lab: Pathogen Genomics Unit                                                                                                                                             | COVID-19 Genomics UK (COG-UK) Consortium                                   | Catherine Moore et al      |
| EPI_ISL_627255 | Oxford Viromics, NDM, University of Oxford; Oxford University Hospitals; Basingstoke and North Hampshire Hospital                                                                                                   | COVID-19 Genomics UK (COG-UK) Consortium                                   | Tanya Golubchik et al      |
| EPI_ISL_595963 | Quadram Institute Bioscience                                                                                                                                                                                        | COVID-19 Genomics UK (COG-UK) Consortium                                   | Dave J. Baker et al        |
| EPI_ISL_595972 | Quadram Institute Bioscience                                                                                                                                                                                        | COVID-19 Genomics UK (COG-UK) Consortium                                   | Dave J. Baker et al        |
| EPI_ISL_627256 | Oxford Viromics, NDM, University of Oxford; Oxford University Hospitals; Basingstoke and North Hampshire Hospital                                                                                                   | COVID-19 Genomics UK (COG-UK) Consortium                                   | Tanya Golubchik et al      |
| EPI_ISL_627258 | Oxford Viromics, NDM, University of Oxford; Oxford University Hospitals; Basingstoke and North Hampshire Hospital                                                                                                   | COVID-19 Genomics UK (COG-UK) Consortium                                   | Tanya Golubchik et al      |
| EPI_ISL_595994 | Quadram Institute Bioscience                                                                                                                                                                                        | COVID-19 Genomics UK (COG-UK) Consortium                                   | Dave J. Baker et al        |
| EPI_ISL_596020 | Quadram Institute Bioscience                                                                                                                                                                                        | COVID-19 Genomics UK (COG-UK) Consortium                                   | Dave J. Baker et al        |
| EPI_ISL_597268 | Lighthouse Lab in Glasgow                                                                                                                                                                                           | Wellcome Sanger Institute for the COVID-19 Genomics UK (COG-UK) consortium | Harper VanSteenhouse et al |
| EPI_ISL_597415 | Lighthouse Lab in Glasgow                                                                                                                                                                                           | Wellcome Sanger Institute for the COVID-19 Genomics UK (COG-UK) consortium | Harper VanSteenhouse et al |
| EPI_ISL_597391 | Lighthouse Lab in Glasgow                                                                                                                                                                                           | Wellcome Sanger Institute for the COVID-19 Genomics UK (COG-UK) consortium | Harper VanSteenhouse et al |
| EPI_ISL_665272 | Northumbria University / South Tees Hospitals NHS Foundation Trust / North Cumbria Integrated Care NHS Foundation Trust / North Tees and Hartlepool NHS Foundation Trust / Newcastle Hospitals NHS Foundation Trust | COVID-19 Genomics UK (COG-UK) Consortium                                   | Darren L Smith et al       |
| EPI_ISL_627260 | Oxford Viromics, NDM, University of Oxford; Oxford University Hospitals; Basingstoke and North Hampshire Hospital                                                                                                   | COVID-19 Genomics UK (COG-UK) Consortium                                   | Tanya Golubchik et al      |
| EPI_ISL_627261 | Oxford Viromics, NDM, University of Oxford; Oxford University Hospitals; Basingstoke and North Hampshire Hospital                                                                                                   | COVID-19 Genomics UK (COG-UK) Consortium                                   | Tanya Golubchik et al      |
| EPI_ISL_627262 | Oxford Viromics, NDM, University of Oxford; Oxford University Hospitals; Basingstoke and North Hampshire Hospital                                                                                                   | COVID-19 Genomics UK (COG-UK) Consortium                                   | Tanya Golubchik et al      |
| EPI_ISL_638086 | Oxford Viromics, NDM, University of Oxford; Oxford University Hospitals; Basingstoke and North Hampshire Hospital                                                                                                   | COVID-19 Genomics UK (COG-UK) Consortium                                   | Tanya Golubchik et al      |
| EPI_ISL_638087 | Oxford Viromics, NDM, University of Oxford; Oxford University Hospitals; Basingstoke and North Hampshire Hospital                                                                                                   | COVID-19 Genomics UK (COG-UK) Consortium                                   | Tanya Golubchik et al      |
| EPI_ISL_638088 | Oxford Viromics, NDM, University of Oxford; Oxford University Hospitals; Basingstoke and North Hampshire Hospital                                                                                                   | COVID-19 Genomics UK (COG-UK) Consortium                                   | Tanya Golubchik et al      |
| EPI_ISL_643255 | Lighthouse Lab in Glasgow                                                                                                                                                                                           | Wellcome Sanger Institute for the COVID-19 Genomics UK (COG-UK) Consortium | Harper VanSteenhouse et al |
| EPI_ISL_643227 | Lighthouse Lab in Glasgow                                                                                                                                                                                           | Wellcome Sanger Institute for the COVID-19 Genomics UK (COG-UK) Consortium | Harper VanSteenhouse et al |
| EPI_ISL_643052 | Lighthouse Lab in Glasgow                                                                                                                                                                                           | Wellcome Sanger Institute for the COVID-19 Genomics UK (COG-UK) Consortium | Harper VanSteenhouse et al |
| EPI_ISL_643090 | Lighthouse Lab in Glasgow                                                                                                                                                                                           | Wellcome Sanger Institute for the COVID-19 Genomics UK (COG-UK) Consortium | Harper VanSteenhouse et al |
| EPI_ISL_643200 | Lighthouse Lab in Glasgow                                                                                                                                                                                           | Wellcome Sanger Institute for the COVID-19 Genomics UK (COG-UK) Consortium | Harper VanSteenhouse et al |
| EPI_ISL_665761 | Queens Medical Centre, Clinical Microbiology Department / DeepSeq Nottingham                                                                                                                                        | COVID-19 Genomics UK (COG-UK) Consortium                                   | Gemma Clark et al          |
| EPI_ISL_651466 | Queens Medical Centre, Clinical Microbiology Department / DeepSeq Nottingham                                                                                                                                        | COVID-19 Genomics UK (COG-UK) Consortium                                   | Gemma Clark et al          |
| EPI_ISL_611423 | Lighthouse Lab in Glasgow                                                                                                                                                                                           | Wellcome Sanger Institute for the COVID-19 Genomics UK (COG-UK) consortium | Harper VanSteenhouse et al |















|                |                                                                                                                                                                                  |                                                                                                                                 |                                 |
|----------------|----------------------------------------------------------------------------------------------------------------------------------------------------------------------------------|---------------------------------------------------------------------------------------------------------------------------------|---------------------------------|
| EPI_ISL_704683 | Lighthouse Lab in Glasgow                                                                                                                                                        | Wellcome Sanger Institute for the COVID-19 Genomics UK (COG-UK) Consortium                                                      | Harper VanSteenhouse et al      |
| EPI_ISL_703859 | Lighthouse Lab in Glasgow                                                                                                                                                        | Wellcome Sanger Institute for the COVID-19 Genomics UK (COG-UK) Consortium                                                      | Harper VanSteenhouse et al      |
| EPI_ISL_704246 | Lighthouse Lab in Glasgow                                                                                                                                                        | Wellcome Sanger Institute for the COVID-19 Genomics UK (COG-UK) Consortium                                                      | Harper VanSteenhouse et al      |
| EPI_ISL_704429 | Lighthouse Lab in Glasgow                                                                                                                                                        | Wellcome Sanger Institute for the COVID-19 Genomics UK (COG-UK) Consortium                                                      | Harper VanSteenhouse et al      |
| EPI_ISL_704230 | Lighthouse Lab in Glasgow                                                                                                                                                        | Wellcome Sanger Institute for the COVID-19 Genomics UK (COG-UK) Consortium                                                      | Harper VanSteenhouse et al      |
| EPI_ISL_704258 | Lighthouse Lab in Glasgow                                                                                                                                                        | Wellcome Sanger Institute for the COVID-19 Genomics UK (COG-UK) Consortium                                                      | Harper VanSteenhouse et al      |
| EPI_ISL_704292 | Lighthouse Lab in Glasgow                                                                                                                                                        | Wellcome Sanger Institute for the COVID-19 Genomics UK (COG-UK) Consortium                                                      | Harper VanSteenhouse et al      |
| EPI_ISL_704367 | Lighthouse Lab in Glasgow                                                                                                                                                        | Wellcome Sanger Institute for the COVID-19 Genomics UK (COG-UK) Consortium                                                      | Harper VanSteenhouse et al      |
| EPI_ISL_704237 | Lighthouse Lab in Glasgow                                                                                                                                                        | Wellcome Sanger Institute for the COVID-19 Genomics UK (COG-UK) Consortium                                                      | Harper VanSteenhouse et al      |
| EPI_ISL_680119 | Virology Department, Sheffield Teaching Hospitals NHS Foundation Trust/Department of Infection, Immunity and Cardiovascular Disease, The Medical School, University of Sheffield | COVID-19 Genomics UK (COG-UK) Consortium                                                                                        | Thushan de Silva et al          |
| EPI_ISL_611869 | Virology Department, Sheffield Teaching Hospitals NHS Foundation Trust/Department of Infection, Immunity and Cardiovascular Disease, The Medical School, University of Sheffield | COVID-19 Genomics UK (COG-UK) Consortium                                                                                        | Thushan de Silva et al          |
| EPI_ISL_650488 | Virology Department, Sheffield Teaching Hospitals NHS Foundation Trust/Department of Infection, Immunity and Cardiovascular Disease, The Medical School, University of Sheffield | COVID-19 Genomics UK (COG-UK) Consortium                                                                                        | Thushan de Silva et al          |
| EPI_ISL_637436 | Virology Department, Sheffield Teaching Hospitals NHS Foundation Trust/Department of Infection, Immunity and Cardiovascular Disease, The Medical School, University of Sheffield | COVID-19 Genomics UK (COG-UK) Consortium                                                                                        | Thushan de Silva et al          |
| EPI_ISL_680133 | Virology Department, Sheffield Teaching Hospitals NHS Foundation Trust/Department of Infection, Immunity and Cardiovascular Disease, The Medical School, University of Sheffield | COVID-19 Genomics UK (COG-UK) Consortium                                                                                        | Thushan de Silva et al          |
| EPI_ISL_453709 | Virology Department, Sheffield Teaching Hospitals NHS Foundation Trust/Department of Infection, Immunity and Cardiovascular Disease, The Medical School, University of Sheffield | COVID-19 Genomics UK (COG-UK) Consortium                                                                                        | Thushan de Silva et al          |
| EPI_ISL_611520 | Virology Department, Sheffield Teaching Hospitals NHS Foundation Trust/Department of Infection, Immunity and Cardiovascular Disease, The Medical School, University of Sheffield | COVID-19 Genomics UK (COG-UK) Consortium                                                                                        | Thushan de Silva et al          |
| EPI_ISL_611699 | Virology Department, Sheffield Teaching Hospitals NHS Foundation Trust/Department of Infection, Immunity and Cardiovascular Disease, The Medical School, University of Sheffield | COVID-19 Genomics UK (COG-UK) Consortium                                                                                        | Thushan de Silva et al          |
| EPI_ISL_475410 | Virology Department, Sheffield Teaching Hospitals NHS Foundation Trust/Department of Infection, Immunity and Cardiovascular Disease, The Medical School, University of Sheffield | COVID-19 Genomics UK (COG-UK) Consortium                                                                                        | Thushan de Silva et al          |
| EPI_ISL_680168 | Virology Department, Sheffield Teaching Hospitals NHS Foundation Trust/Department of Infection, Immunity and Cardiovascular Disease, The Medical School, University of Sheffield | COVID-19 Genomics UK (COG-UK) Consortium                                                                                        | Thushan de Silva et al          |
| EPI_ISL_596211 | Virology Department, Sheffield Teaching Hospitals NHS Foundation Trust/Department of Infection, Immunity and Cardiovascular Disease, The Medical School, University of Sheffield | COVID-19 Genomics UK (COG-UK) Consortium                                                                                        | Thushan de Silva et al          |
| EPI_ISL_572618 | Virology Department, Sheffield Teaching Hospitals NHS Foundation Trust/Department of Infection, Immunity and Cardiovascular Disease, The Medical School, University of Sheffield | COVID-19 Genomics UK (COG-UK) Consortium                                                                                        | Thushan de Silva et al          |
| EPI_ISL_680187 | Virology Department, Sheffield Teaching Hospitals NHS Foundation Trust/Department of Infection, Immunity and Cardiovascular Disease, The Medical School, University of Sheffield | COVID-19 Genomics UK (COG-UK) Consortium                                                                                        | Thushan de Silva et al          |
| EPI_ISL_414500 | Virology Department, Sheffield Teaching Hospitals NHS Foundation Trust                                                                                                           | Department of Infection, Immunity and Cardiovascular Disease, The Florey Institute, The Medical School, University of Sheffield | Thushan de Silva et al          |
| EPI_ISL_414501 | Virology Department, Sheffield Teaching Hospitals NHS Foundation Trust                                                                                                           | Department of Infection, Immunity and Cardiovascular Disease, The Florey Institute, The Medical School, University of Sheffield | Thushan de Silva et al          |
| EPI_ISL_492900 | Department of Medical Microbiology, Western Sussex Hospitals NHS Foundation Trust, St Richard's Hospital                                                                         | Wellcome Sanger Institute for the COVID-19 Genomics UK (COG-UK) consortium                                                      | Manasa Mutingwende et al        |
| EPI_ISL_614296 | Faroese National Reference Laboratory for Fish and Animal Diseases                                                                                                               | Faroese National Reference Laboratory for Fish and Animal Diseases                                                              | Maria Marjunardóttir Dahl et al |



|                |                                                                                                                         |                                                                                                                         |                         |
|----------------|-------------------------------------------------------------------------------------------------------------------------|-------------------------------------------------------------------------------------------------------------------------|-------------------------|
| EPI_ISL_623102 | CNR Virus des Infections Respiratoires - France SUD                                                                     | CNR Virus des Infections Respiratoires - France SUD                                                                     | Antonin Bal et al       |
| EPI_ISL_639999 | CNR Virus des Infections Respiratoires - France SUD                                                                     | CNR Virus des Infections Respiratoires - France SUD                                                                     | Antonin Bal et al       |
| EPI_ISL_693765 | hospital                                                                                                                | National Reference Center for Viruses of Respiratory Infections, Institut Pasteur, Paris                                | Marion Barbet et al     |
| EPI_ISL_414623 | Laboratoire de Virologie Institut de Virologie - INSERM U 1109 Hôpitaux Universitaires de Strasbourg                    | National Reference Center for Viruses of Respiratory Infections, Institut Pasteur, Paris                                | Mélnie Albert et al     |
| EPI_ISL_414631 | Hôpital Robert Debré Laboratoire de Virologie                                                                           | National Reference Center for Viruses of Respiratory Infections, Institut Pasteur, Paris                                | Mélnie Albert et al     |
| EPI_ISL_414632 | Hôpital Robert Debré Laboratoire de Virologie                                                                           | National Reference Center for Viruses of Respiratory Infections, Institut Pasteur, Paris                                | Mélnie Albert et al     |
| EPI_ISL_414626 | unknown                                                                                                                 | National Reference Center for Viruses of Respiratory Infections, Institut Pasteur, Paris                                | Mélnie Albert et al     |
| EPI_ISL_414627 | Centre Hospitalier Compiègne Laboratoire de Biologie                                                                    | National Reference Center for Viruses of Respiratory Infections, Institut Pasteur, Paris                                | Mélnie Albert et al     |
| EPI_ISL_414628 | Centre Hospitalier Compiègne Laboratoire de Biologie                                                                    | National Reference Center for Viruses of Respiratory Infections, Institut Pasteur, Paris                                | Mélnie Albert et al     |
| EPI_ISL_414629 | Centre Hospitalier Compiègne Laboratoire de Biologie                                                                    | National Reference Center for Viruses of Respiratory Infections, Institut Pasteur, Paris                                | Mélnie Albert et al     |
| EPI_ISL_414630 | Centre Hospitalier Compiègne Laboratoire de Biologie                                                                    | National Reference Center for Viruses of Respiratory Infections, Institut Pasteur, Paris                                | Mélnie Albert et al     |
| EPI_ISL_414634 | Centre Hospitalier Compiègne Laboratoire de Biologie                                                                    | National Reference Center for Viruses of Respiratory Infections, Institut Pasteur, Paris                                | Mélnie Albert et al     |
| EPI_ISL_414635 | Centre Hospitalier Compiègne Laboratoire de Biologie                                                                    | National Reference Center for Viruses of Respiratory Infections, Institut Pasteur, Paris                                | Mélnie Albert et al     |
| EPI_ISL_414636 | Centre Hospitalier Compiègne Laboratoire de Biologie                                                                    | National Reference Center for Viruses of Respiratory Infections, Institut Pasteur, Paris                                | Mélnie Albert et al     |
| EPI_ISL_414637 | Centre Hospitalier Compiègne Laboratoire de Biologie                                                                    | National Reference Center for Viruses of Respiratory Infections, Institut Pasteur, Paris                                | Mélnie Albert et al     |
| EPI_ISL_414638 | Centre Hospitalier Compiègne Laboratoire de Biologie                                                                    | National Reference Center for Viruses of Respiratory Infections, Institut Pasteur, Paris                                | Mélnie Albert et al     |
| EPI_ISL_406596 | Department of Infectious and Tropical Diseases, Bichat Claude Bernard Hospital, Paris                                   | National Reference Center for Viruses of Respiratory Infections, Institut Pasteur, Paris                                | Mélanie Albert et al    |
| EPI_ISL_406597 | Department of Infectious and Tropical Diseases, Bichat Claude Bernard Hospital, Paris                                   | National Reference Center for Viruses of Respiratory Infections, Institut Pasteur, Paris                                | Mélanie Albert et al    |
| EPI_ISL_408430 | Department of Infectious and Tropical Diseases, Bichat Claude Bernard Hospital, Paris                                   | National Reference Center for Viruses of Respiratory Infections, Institut Pasteur, Paris                                | Mélanie Albert et al    |
| EPI_ISL_408431 | Sorbonne Université, Inserm et Assistance Publique-Hôpitaux de Paris (Pitié Salpêtrière)                                | National Reference Center for Viruses of Respiratory Infections, Institut Pasteur, Paris                                | Mélanie Albert et al    |
| EPI_ISL_414633 | Centre Hospitalier René Dubois Laboratoire de Microbiologie - Bât A                                                     | National Reference Center for Viruses of Respiratory Infections, Institut Pasteur, Paris                                | Mélnie Albert et al     |
| EPI_ISL_414624 | Centre Hospitalier Universitaire de Rouen Laboratoire de Virologie                                                      | National Reference Center for Viruses of Respiratory Infections, Institut Pasteur, Paris                                | Mélnie Albert et al     |
| EPI_ISL_569312 | MEPHI, Aix Marseille University                                                                                         | MEPHI, Aix Marseille University                                                                                         | Anthony LEVASSEUR et al |
| EPI_ISL_644400 | MEPHI, Aix Marseille University                                                                                         | MEPHI, Aix Marseille University                                                                                         | Anthony LEVASSEUR et al |
| EPI_ISL_644401 | MEPHI, Aix Marseille University                                                                                         | MEPHI, Aix Marseille University                                                                                         | Anthony LEVASSEUR et al |
| EPI_ISL_414625 | Centre Hospitalier Régional Universitaire de Nantes Laboratoire de Virologie                                            | National Reference Center for Viruses of Respiratory Infections, Institut Pasteur, Paris                                | Mélnie Albert et al     |
| EPI_ISL_411066 | Fujian Center for Disease Control and Prevention                                                                        | Fujian Center for Disease Control and Prevention                                                                        | Chen Wei et al          |
| EPI_ISL_411060 | Fujian Center for Disease Control and Prevention                                                                        | Fujian Center for Disease Control and Prevention                                                                        | Chen Wei et al          |
| EPI_ISL_415643 | R. G. Lugar Center for Public Health Research, National Center for Disease Control and Public Health (NCDC) of Georgia. | R. G. Lugar Center for Public Health Research, National Center for Disease Control and Public Health (NCDC) of Georgia. | Nato Kotaria et al      |
| EPI_ISL_415642 | R. G. Lugar Center for Public Health Research, National Center for Disease Control and Public Health (NCDC) of Georgia. | R. G. Lugar Center for Public Health Research, National Center for Disease Control and Public Health (NCDC) of Georgia. | Nato Kotaria et al      |
| EPI_ISL_415641 | R. G. Lugar Center for Public Health Research, National Center for Disease Control and Public Health (NCDC) of Georgia. | R. G. Lugar Center for Public Health Research, National Center for Disease Control and Public Health (NCDC) of Georgia. | Nato Kotaria et al      |
| EPI_ISL_415644 | R. G. Lugar Center for Public Health Research, National Center for Disease Control and Public Health (NCDC) of Georgia. | R. G. Lugar Center for Public Health Research, National Center for Disease Control and Public Health (NCDC) of Georgia. | Nato Kotaria et al      |
| EPI_ISL_412912 | State Health Office Baden-Württemberg                                                                                   | Charité Universitätsmedizin Berlin, Institute of Virology                                                               | Victor M Corman et al   |





|                |                                                                                                                                                                                                                                |                                                                                                                                                                                                                                |                          |
|----------------|--------------------------------------------------------------------------------------------------------------------------------------------------------------------------------------------------------------------------------|--------------------------------------------------------------------------------------------------------------------------------------------------------------------------------------------------------------------------------|--------------------------|
| EPI_ISL_414688 | State Key Laboratory of Respiratory Disease, National Clinical Research Center for Respiratory Disease, Guangzhou Institute of Respiratory Health, the First Affiliated Hospital of Guangzhou Medical University               | The First Affiliated Hospital of Guangzhou Medical University & BGI-Shenzhen                                                                                                                                                   | Zhao et al et al         |
| EPI_ISL_414689 | State Key Laboratory of Respiratory Disease, National Clinical Research Center for Respiratory Disease, Guangzhou Institute of Respiratory Health, the First Affiliated Hospital of Guangzhou Medical University               | The First Affiliated Hospital of Guangzhou Medical University & BGI-Shenzhen                                                                                                                                                   | Zhao et al et al         |
| EPI_ISL_414690 | State Key Laboratory of Respiratory Disease, National Clinical Research Center for Respiratory Disease, Guangzhou Institute of Respiratory Health, the First Affiliated Hospital of Guangzhou Medical University               | The First Affiliated Hospital of Guangzhou Medical University & BGI-Shenzhen                                                                                                                                                   | Zhao et al et al         |
| EPI_ISL_414691 | State Key Laboratory of Respiratory Disease, National Clinical Research Center for Respiratory Disease, Guangzhou Institute of Respiratory Health, the First Affiliated Hospital of Guangzhou Medical University               | The First Affiliated Hospital of Guangzhou Medical University & BGI-Shenzhen                                                                                                                                                   | Zhao et al et al         |
| EPI_ISL_412966 | Technology Centre, Guangzhou Customs                                                                                                                                                                                           | Technology Centre, Guangzhou Customs                                                                                                                                                                                           | Shi et al                |
| EPI_ISL_412967 | Technology Centre, Guangzhou Customs                                                                                                                                                                                           | Technology Centre, Guangzhou Customs                                                                                                                                                                                           | Shi et al                |
| EPI_ISL_406970 | Hangzhou Center for Disease and Control Microbiology Lab                                                                                                                                                                       | Hangzhou Center for Disease and Control Microbiology Lab                                                                                                                                                                       | Yu Hua et al             |
| EPI_ISL_407313 | Hangzhou Center for Disease Control and Prevention                                                                                                                                                                             | Hangzhou Center for Disease Control and Prevention                                                                                                                                                                             | Jun Li et al             |
| EPI_ISL_415709 | State Key Laboratory for Diagnosis and Treatment of Infectious Diseases, National Clinical Research Center for Infectious Diseases, First Affiliated Hospital, Zhejiang University School of Medicine, Hangzhou, China. 310003 | State Key Laboratory for Diagnosis and Treatment of Infectious Diseases, National Clinical Research Center for Infectious Diseases, First Affiliated Hospital, Zhejiang University School of Medicine, Hangzhou, China. 310003 | Hangping Yao et al       |
| EPI_ISL_416042 | State Key Laboratory for Diagnosis and Treatment of Infectious Diseases, National Clinical Research Center for Infectious Diseases, First Affiliated Hospital, Zhejiang University School of Medicine, Hangzhou, China. 310003 | State Key Laboratory for Diagnosis and Treatment of Infectious Diseases, National Clinical Research Center for Infectious Diseases, First Affiliated Hospital, Zhejiang University School of Medicine, Hangzhou, China. 310003 | Hangping Yao et al       |
| EPI_ISL_416044 | State Key Laboratory for Diagnosis and Treatment of Infectious Diseases, National Clinical Research Center for Infectious Diseases, First Affiliated Hospital, Zhejiang University School of Medicine, Hangzhou, China 310003  | State Key Laboratory for Diagnosis and Treatment of Infectious Diseases, National Clinical Research Center for Infectious Diseases, First Affiliated Hospital, Zhejiang University School of Medicine, Hangzhou, China 310003  | Hangping Yao et al       |
| EPI_ISL_416046 | State Key Laboratory for Diagnosis and Treatment of Infectious Diseases, National Clinical Research Center for Infectious Diseases, First Affiliated Hospital, Zhejiang University School of Medicine, Hangzhou, China 310003  | State Key Laboratory for Diagnosis and Treatment of Infectious Diseases, National Clinical Research Center for Infectious Diseases, First Affiliated Hospital, Zhejiang University School of Medicine, Hangzhou, China 310003  | Hangping Yao et al       |
| EPI_ISL_415711 | State Key Laboratory for Diagnosis and Treatment of Infectious Diseases, National Clinical Research Center for Infectious Diseases, First Affiliated Hospital, Zhejiang University School of Medicine, Hangzhou, China. 310003 | State Key Laboratory for Diagnosis and Treatment of Infectious Diseases, National Clinical Research Center for Infectious Diseases, First Affiliated Hospital, Zhejiang University School of Medicine, Hangzhou, China. 310003 | Hangping Yao et al       |
| EPI_ISL_416047 | State Key Laboratory for Diagnosis and Treatment of Infectious Diseases, National Clinical Research Center for Infectious Diseases, First Affiliated Hospital, Zhejiang University School of Medicine, Hangzhou, China 310003  | State Key Laboratory for Diagnosis and Treatment of Infectious Diseases, National Clinical Research Center for Infectious Diseases, First Affiliated Hospital, Zhejiang University School of Medicine, Hangzhou, China 310003  | Hangping Yao et al       |
| EPI_ISL_416425 | State Key Laboratory for Diagnosis and Treatment of Infectious Diseases, National Clinical Research Center for Infectious Diseases, First Affiliated Hospital, Zhejiang University School of Medicine, Hangzhou, China 310003  | State Key Laboratory for Diagnosis and Treatment of Infectious Diseases, National Clinical Research Center for Infectious Diseases, First Affiliated Hospital, Zhejiang University School of Medicine, Hangzhou, China 310003  | Hangping Yao et al       |
| EPI_ISL_412026 | Second Hospital of Anhui Medical University                                                                                                                                                                                    | Second Hospital of Anhui Medical University                                                                                                                                                                                    | Changtai Wang et al      |
| EPI_ISL_416314 | Department of Microbiology, Faculty of Medicine, The Chinese University of Hong Kong, Hong Kong SAR, China                                                                                                                     | Department of Microbiology, Faculty of Medicine, Chinese University of Hong Kong, Hong Kong SAR, China                                                                                                                         | Zigui Chen et al         |
| EPI_ISL_416315 | Department of Microbiology, Faculty of Medicine, The Chinese University of Hong Kong, Hong Kong SAR, China                                                                                                                     | Department of Microbiology, Faculty of Medicine, Chinese University of Hong Kong, Hong Kong SAR, China                                                                                                                         | Zigui Chen et al         |
| EPI_ISL_412029 | Hong Kong Department of Health                                                                                                                                                                                                 | The University of Hong Kong                                                                                                                                                                                                    | Dominic N.C. Tsang et al |
| EPI_ISL_412030 | Hong Kong Department of Health                                                                                                                                                                                                 | School of Public Health, The University of Hong Kong                                                                                                                                                                           | Dominic N.C. Tsang et al |
| EPI_ISL_412028 | Hong Kong Department of Health                                                                                                                                                                                                 | School of Public Health, The University of Hong Kong                                                                                                                                                                           | Dominic N.C. Tsang et al |
| EPI_ISL_414527 | Hong Kong Department of Health                                                                                                                                                                                                 | School of Public Health, The University of Hong Kong                                                                                                                                                                           | Dominic N.C. Tsang et al |
| EPI_ISL_414528 | Hong Kong Department of Health                                                                                                                                                                                                 | School of Public Health, The University of Hong Kong                                                                                                                                                                           | Dominic N.C. Tsang et al |
| EPI_ISL_414569 | Hong Kong Department of Health                                                                                                                                                                                                 | School of Public Health, The University of Hong Kong                                                                                                                                                                           | Dominic N.C. Tsang et al |
| EPI_ISL_414571 | Hong Kong Department of Health                                                                                                                                                                                                 | School of Public Health, The University of Hong Kong                                                                                                                                                                           | Dominic N.C. Tsang et al |
| EPI_ISL_414519 | Hong Kong Department of Health                                                                                                                                                                                                 | School of Public Health, The University of Hong Kong                                                                                                                                                                           | Dominic N.C. Tsang et al |
| EPI_ISL_414517 | Hong Kong Department of Health                                                                                                                                                                                                 | School of Public Health, The University of Hong Kong                                                                                                                                                                           | Dominic N.C. Tsang et al |
| EPI_ISL_677761 | University of Szeged, Institute of Clinical Microbiology                                                                                                                                                                       | National Laboratory of Virology, Szentágotai Research Centre                                                                                                                                                                   | Endre Gábor Tóth et al   |

|                |                                                                                             |                                                                                                |                            |
|----------------|---------------------------------------------------------------------------------------------|------------------------------------------------------------------------------------------------|----------------------------|
| EPI_ISL_416426 | Virological Research Group, Szentágotthai Research Centre, University of Pécs               | Bioinformatics Research Group, Szentágotthai Research Centre, University of Pécs               | Péter Urbán et al          |
| EPI_ISL_413522 | Indian Council of Medical Research - National Institute of Virology                         | National Influenza Center, Indian Council of Medical Research - National Institute of Virology | Potdar V et al             |
| EPI_ISL_413523 | Indian Council of Medical Research-National Institute of Virology                           | National Influenza Center, Indian Council of Medical Research-National Institute of Virology   | Potdar V et al             |
| EPI_ISL_414487 | UCD National Virus Reference Laboratory                                                     | UCD National Virus Reference Laboratory                                                        | Michael Carr et al         |
| EPI_ISL_414584 | UCD National Virus Reference Laboratory                                                     | UCD National Virus Reference Laboratory                                                        | Michael Carr et al         |
| EPI_ISL_414585 | UCD National Virus Reference Laboratory                                                     | UCD National Virus Reference Laboratory                                                        | Michael Carr et al         |
| EPI_ISL_414586 | UCD National Virus Reference Laboratory                                                     | UCD National Virus Reference Laboratory                                                        | Michael Carr et al         |
| EPI_ISL_414587 | UCD National Virus Reference Laboratory                                                     | UCD National Virus Reference Laboratory                                                        | Michael Carr et al         |
| EPI_ISL_412974 | Department of Infectious Diseases, Istituto Superiore di Sanità, Rome, Italy                | Virology Laboratory, Scientific Department, Army Medical Center                                | Paola Stefanelli et al     |
| EPI_ISL_410546 | INMI Lazzaro Spallanzani IRCCS                                                              | Laboratory of Virology, INMI Lazzaro Spallanzani IRCCS                                         | Maria R. Capobianchi et al |
| EPI_ISL_410545 | INMI Lazzaro Spallanzani IRCCS                                                              | Laboratory of Virology, INMI Lazzaro Spallanzani IRCCS                                         | Maria R. Capobianchi et al |
| EPI_ISL_412973 | Department of Infectious Diseases, Istituto Superiore di Sanità, Roma, Italy                | Virology Laboratory, Scientific Department, Army Medical Center                                | Paola Stefanelli et al     |
| EPI_ISL_413489 | Laboratorio di Microbiologia e Virologia, Università Vita-Salute San Raffaele, Milano       | Laboratorio di Microbiologia e Virologia, Università Vita-Salute San Raffaele, Milano          | R.A Diotti et al           |
| EPI_ISL_407084 | Department of Virology III, National Institute of Infectious Diseases                       | Pathogen Genomics Center, National Institute of Infectious Diseases                            | Tsuyoshi Sekizuka et al    |
| EPI_ISL_412968 | Takayuki Hishiki Kanagawa Prefectural Institute of Public Health                            | Takayuki Hishiki Kanagawa Prefectural Institute of Public Health                               | Hishiki et al              |
| EPI_ISL_412969 | Takayuki Hishiki Kanagawa Prefectural Institute of Public Health                            | Takayuki Hishiki Kanagawa Prefectural Institute of Public Health                               | Hishiki et al              |
| EPI_ISL_667615 | Pathogen Genomics Center, National Institute of Infectious Diseases                         | Pathogen Genomics Center, National Institute of Infectious Diseases                            | Tsuyoshi Sekizuka et al    |
| EPI_ISL_667669 | Pathogen Genomics Center, National Institute of Infectious Diseases                         | Pathogen Genomics Center, National Institute of Infectious Diseases                            | Tsuyoshi Sekizuka et al    |
| EPI_ISL_408669 | Dept. of Virology III, National Institute of Infectious Diseases                            | Pathogen Genomics Center, National Institute of Infectious Diseases                            | Tsuyoshi Sekizuka et al    |
| EPI_ISL_410531 | Dept. of Pathology, National Institute of Infectious Diseases                               | Pathogen Genomics Center, National Institute of Infectious Diseases                            | Tsuyoshi Sekizuka et al    |
| EPI_ISL_410532 | Dept. of Pathology, National Institute of Infectious Diseases                               | Pathogen Genomics Center, National Institute of Infectious Diseases                            | Tsuyoshi Sekizuka et al    |
| EPI_ISL_413459 | Department of Pathology, Toshima Hospital                                                   | Pathogen Genomics Center, National Institute of Infectious Diseases                            | Tsuyoshi Sekizuka et al    |
| EPI_ISL_408665 | Dept. of Virology III, National Institute of Infectious Diseases                            | Pathogen Genomics Center, National Institute of Infectious Diseases                            | Tsuyoshi Sekizuka et al    |
| EPI_ISL_408666 | Dept. of Virology III, National Institute of Infectious Diseases                            | Pathogen Genomics Center, National Institute of Infectious Diseases                            | Tsuyoshi Sekizuka et al    |
| EPI_ISL_408667 | Dept. of Virology III, National Institute of Infectious Diseases                            | Pathogen Genomics Center, National Institute of Infectious Diseases                            | Tsuyoshi Sekizuka et al    |
| EPI_ISL_408488 | National Institute for Viral Disease Control and Prevention, China CDC                      | National Institute for Viral Disease Control & Prevention, CCDC                                | Wenjie Tan et al           |
| EPI_ISL_411950 | NHC Key laboratory of Enteric Pathogenic Microbiology, Institute of Pathogenic Microbiology | Jiangsu Provincial Center for Disease Control & Prevention                                     | Lunbiao Cui et al          |
| EPI_ISL_411952 | NHC Key laboratory of Enteric Pathogenic Microbiology, Institute of Pathogenic Microbiology | Jiangsu Provincial Center for Disease Control & Prevention                                     | Kangchen Zhao et al        |
| EPI_ISL_411953 | NHC Key laboratory of Enteric Pathogenic Microbiology, Institute of Pathogenic Microbiology | Jiangsu Provincial Center for Disease Control & Prevention                                     | Kangchen Zhao et al        |
| EPI_ISL_408486 | National Institute for Viral Disease Control and Prevention, China CDC                      | National Institute for Viral Disease Control & Prevention, CCDC                                | Wenjie Tan et al           |
| EPI_ISL_412459 | Jingzhou Center for Disease Control and Prevention                                          | Hubei Provincial Center for Disease Control and Prevention                                     | Bin Fang et al             |
| EPI_ISL_413593 | Laboratoire National de Santé                                                               | Erasmus Medical Center                                                                         | David Nieuwenhuijse et al  |
| EPI_ISL_501196 | Department of Medical Microbiology, University Malaya Medical Centre                        | Department of Medical Microbiology, Faculty of Medicine, University of Malaya                  | Yoong Min CHONG et al      |
| EPI_ISL_501218 | Department of Medical Microbiology, University Malaya Medical Centre                        | Department of Medical Microbiology, Faculty of Medicine, University of Malaya                  | Yoong Min CHONG et al      |

|                |                                                                                |                                                               |                                |
|----------------|--------------------------------------------------------------------------------|---------------------------------------------------------------|--------------------------------|
| EPI_ISL_412972 | Instituto Nacional de Enfermedades Respiratorias                               | Instituto de Diagnostico y Referencia Epidemiologicos (INDRE) | Ramirez-Gonzalez Ernesto et al |
| EPI_ISL_410301 | National Influenza Centre, National Public Health Laboratory, Kathmandu, Nepal | The University of Hong Kong                                   | Ranjit Sah et al               |
| EPI_ISL_413564 | MHC West-Brabant                                                               | Erasmus Medical Center                                        | David Nieuwenhuijse et al      |
| EPI_ISL_413565 | Foundation Pamm                                                                | Erasmus Medical Center                                        | David Nieuwenhuijse et al      |
| EPI_ISL_413566 | MHC Gooi & Vechtstreek                                                         | Erasmus Medical Center                                        | David Nieuwenhuijse et al      |
| EPI_ISL_413567 | unknown                                                                        | Erasmus Medical Center                                        | David Nieuwenhuijse et al      |
| EPI_ISL_413568 | MHC Drente                                                                     | Erasmus Medical Center                                        | David Nieuwenhuijse et al      |
| EPI_ISL_413569 | RIVM                                                                           | Erasmus Medical Center                                        | David Nieuwenhuijse et al      |
| EPI_ISL_413570 | RIVM                                                                           | Erasmus Medical Center                                        | David Nieuwenhuijse et al      |
| EPI_ISL_413571 | MHC Brabant Zuidoost                                                           | Erasmus Medical Center                                        | David Nieuwenhuijse et al      |
| EPI_ISL_632445 | Dutch COVID-19 response team                                                   | Erasmus Medical Center                                        | Bas Oude Munnink et al         |
| EPI_ISL_415460 | Dutch COVID-19 response team                                                   | Erasmus Medical Center                                        | David Nieuwenhuijse et al      |
| EPI_ISL_632440 | Dutch COVID-19 response team                                                   | Erasmus Medical Center                                        | Bas Oude Munnink et al         |
| EPI_ISL_632364 | Dutch COVID-19 response team                                                   | Erasmus Medical Center                                        | Bas Oude Munnink et al         |
| EPI_ISL_415461 | Dutch COVID-19 response team                                                   | Erasmus Medical Center                                        | David Nieuwenhuijse et al      |
| EPI_ISL_414423 | Dutch COVID-19 response team                                                   | Erasmus Medical Center                                        | David Nieuwenhuijse et al      |
| EPI_ISL_415462 | Dutch COVID-19 response team                                                   | Erasmus Medical Center                                        | David Nieuwenhuijse et al      |
| EPI_ISL_415463 | Dutch COVID-19 response team                                                   | Erasmus Medical Center                                        | David Nieuwenhuijse et al      |
| EPI_ISL_413572 | MHC Kennemerland                                                               | Erasmus Medical Center                                        | David Nieuwenhuijse et al      |
| EPI_ISL_413573 | Dienst Gezondheid & Jeugd Zuid-Holland Zuid                                    | Erasmus Medical Center                                        | David Nieuwenhuijse et al      |
| EPI_ISL_413574 | MHC West-Brabant                                                               | Erasmus Medical Center                                        | David Nieuwenhuijse et al      |
| EPI_ISL_413575 | RIVM                                                                           | Erasmus Medical Center                                        | David Nieuwenhuijse et al      |
| EPI_ISL_414424 | Dutch COVID-19 response team                                                   | Erasmus Medical Center                                        | David Nieuwenhuijse et al      |
| EPI_ISL_414425 | Dutch COVID-19 response team                                                   | Erasmus Medical Center                                        | David Nieuwenhuijse et al      |
| EPI_ISL_414426 | Dutch COVID-19 response team                                                   | Erasmus Medical Center                                        | David Nieuwenhuijse et al      |
| EPI_ISL_414448 | Dutch COVID-19 response team                                                   | Erasmus Medical Center                                        | David Nieuwenhuijse et al      |
| EPI_ISL_414427 | Dutch COVID-19 response team                                                   | Erasmus Medical Center                                        | David Nieuwenhuijse et al      |
| EPI_ISL_413576 | RIVM                                                                           | Erasmus Medical Center                                        | David Nieuwenhuijse et al      |
| EPI_ISL_415465 | Dutch COVID-19 response team                                                   | Erasmus Medical Center                                        | David Nieuwenhuijse et al      |
| EPI_ISL_415466 | Dutch COVID-19 response team                                                   | Erasmus Medical Center                                        | David Nieuwenhuijse et al      |
| EPI_ISL_415467 | Dutch COVID-19 response team                                                   | Erasmus Medical Center                                        | David Nieuwenhuijse et al      |
| EPI_ISL_415468 | Dutch COVID-19 response team                                                   | Erasmus Medical Center                                        | David Nieuwenhuijse et al      |
| EPI_ISL_415469 | Dutch COVID-19 response team                                                   | Erasmus Medical Center                                        | David Nieuwenhuijse et al      |
| EPI_ISL_415470 | Dutch COVID-19 response team                                                   | Erasmus Medical Center                                        | David Nieuwenhuijse et al      |
| EPI_ISL_415471 | Dutch COVID-19 response team                                                   | Erasmus Medical Center                                        | David Nieuwenhuijse et al      |
| EPI_ISL_415472 | Dutch COVID-19 response team                                                   | Erasmus Medical Center                                        | David Nieuwenhuijse et al      |
| EPI_ISL_415473 | Dutch COVID-19 response team                                                   | Erasmus Medical Center                                        | David Nieuwenhuijse et al      |
| EPI_ISL_415474 | Dutch COVID-19 response team                                                   | Erasmus Medical Center                                        | David Nieuwenhuijse et al      |
| EPI_ISL_415475 | Dutch COVID-19 response team                                                   | Erasmus Medical Center                                        | David Nieuwenhuijse et al      |
| EPI_ISL_415476 | Dutch COVID-19 response team                                                   | Erasmus Medical Center                                        | David Nieuwenhuijse et al      |
| EPI_ISL_415477 | Dutch COVID-19 response team                                                   | Erasmus Medical Center                                        | David Nieuwenhuijse et al      |
| EPI_ISL_415478 | Dutch COVID-19 response team                                                   | Erasmus Medical Center                                        | David Nieuwenhuijse et al      |
| EPI_ISL_415479 | Dutch COVID-19 response team                                                   | Erasmus Medical Center                                        | David Nieuwenhuijse et al      |









|                |                                                                                                                                                                                                                     |                                                                                                                            |                            |
|----------------|---------------------------------------------------------------------------------------------------------------------------------------------------------------------------------------------------------------------|----------------------------------------------------------------------------------------------------------------------------|----------------------------|
| EPI_ISL_414566 | Dutch COVID-19 response team                                                                                                                                                                                        | Erasmus Medical Center                                                                                                     | David Nieuwenhuijse et al  |
| EPI_ISL_415529 | Dutch COVID-19 response team                                                                                                                                                                                        | Erasmus Medical Center                                                                                                     | David Nieuwenhuijse et al  |
| EPI_ISL_415530 | Dutch COVID-19 response team                                                                                                                                                                                        | Erasmus Medical Center                                                                                                     | David Nieuwenhuijse et al  |
| EPI_ISL_415531 | Dutch COVID-19 response team                                                                                                                                                                                        | Erasmus Medical Center                                                                                                     | David Nieuwenhuijse et al  |
| EPI_ISL_415532 | Dutch COVID-19 response team                                                                                                                                                                                        | Erasmus Medical Center                                                                                                     | David Nieuwenhuijse et al  |
| EPI_ISL_415533 | Dutch COVID-19 response team                                                                                                                                                                                        | Erasmus Medical Center                                                                                                     | David Nieuwenhuijse et al  |
| EPI_ISL_415534 | Dutch COVID-19 response team                                                                                                                                                                                        | Erasmus Medical Center                                                                                                     | David Nieuwenhuijse et al  |
| EPI_ISL_415535 | Dutch COVID-19 response team                                                                                                                                                                                        | Erasmus Medical Center                                                                                                     | David Nieuwenhuijse et al  |
| EPI_ISL_414465 | Dutch COVID-19 response team                                                                                                                                                                                        | Erasmus Medical Center                                                                                                     | David Nieuwenhuijse et al  |
| EPI_ISL_414466 | Dutch COVID-19 response team                                                                                                                                                                                        | Erasmus Medical Center                                                                                                     | David Nieuwenhuijse et al  |
| EPI_ISL_414467 | Dutch COVID-19 response team                                                                                                                                                                                        | Erasmus Medical Center                                                                                                     | David Nieuwenhuijse et al  |
| EPI_ISL_414468 | Dutch COVID-19 response team                                                                                                                                                                                        | Erasmus Medical Center                                                                                                     | David Nieuwenhuijse et al  |
| EPI_ISL_414445 | Dutch COVID-19 response team                                                                                                                                                                                        | Erasmus Medical Center                                                                                                     | David Nieuwenhuijse et al  |
| EPI_ISL_548108 | LabPLUS                                                                                                                                                                                                             | Institute of Environmental Science and Research (ESR)                                                                      | Xiaoyun Ren et al          |
| EPI_ISL_413490 | Auckland Hospital                                                                                                                                                                                                   | Institute of Environmental Science and Research (ESR)                                                                      | Matt Storey et al          |
| EPI_ISL_413550 | Centre for Human and Zoonotic Virology (CHAZVY), College of Medicine University of Lagos/Lagos University Teaching Hospital (LUTH), part of the Laboratory Network of the Nigeria Centre for Disease Control (NCDC) | African Centre of Excellence for Genomics of Infectious Diseases (ACEGID), Redeemer's University, Ede, Osun State, Nigeria | Oluniyi P. E. et al        |
| EPI_ISL_610548 | Lighthouse Lab in Alderley Park                                                                                                                                                                                     | Wellcome Sanger Institute for the COVID-19 Genomics UK (COG-UK) consortium                                                 | Jacquelyn Wynn et al       |
| EPI_ISL_414949 | Regional Virus Laboratory, Belfast                                                                                                                                                                                  | Public Health Wales Microbiology Cardiff                                                                                   | Tanya Curran et al         |
| EPI_ISL_536835 | Lighthouse Lab in Glasgow                                                                                                                                                                                           | Wellcome Sanger Institute for the COVID-19 Genomics UK (COG-UK) consortium                                                 | Harper VanSteenhouse et al |
| EPI_ISL_531388 | Lighthouse Lab in Glasgow                                                                                                                                                                                           | Wellcome Sanger Institute for the COVID-19 Genomics UK (COG-UK) consortium                                                 | Harper VanSteenhouse et al |
| EPI_ISL_531286 | Lighthouse Lab in Glasgow                                                                                                                                                                                           | Wellcome Sanger Institute for the COVID-19 Genomics UK (COG-UK) consortium                                                 | Harper VanSteenhouse et al |
| EPI_ISL_531357 | Lighthouse Lab in Glasgow                                                                                                                                                                                           | Wellcome Sanger Institute for the COVID-19 Genomics UK (COG-UK) consortium                                                 | Harper VanSteenhouse et al |
| EPI_ISL_531423 | Lighthouse Lab in Glasgow                                                                                                                                                                                           | Wellcome Sanger Institute for the COVID-19 Genomics UK (COG-UK) consortium                                                 | Harper VanSteenhouse et al |
| EPI_ISL_531426 | Lighthouse Lab in Glasgow                                                                                                                                                                                           | Wellcome Sanger Institute for the COVID-19 Genomics UK (COG-UK) consortium                                                 | Harper VanSteenhouse et al |
| EPI_ISL_530934 | Lighthouse Lab in Glasgow                                                                                                                                                                                           | Wellcome Sanger Institute for the COVID-19 Genomics UK (COG-UK) consortium                                                 | Harper VanSteenhouse et al |
| EPI_ISL_530630 | Lighthouse Lab in Glasgow                                                                                                                                                                                           | Wellcome Sanger Institute for the COVID-19 Genomics UK (COG-UK) consortium                                                 | Harper VanSteenhouse et al |
| EPI_ISL_530655 | Lighthouse Lab in Glasgow                                                                                                                                                                                           | Wellcome Sanger Institute for the COVID-19 Genomics UK (COG-UK) consortium                                                 | Harper VanSteenhouse et al |
| EPI_ISL_530645 | Lighthouse Lab in Glasgow                                                                                                                                                                                           | Wellcome Sanger Institute for the COVID-19 Genomics UK (COG-UK) consortium                                                 | Harper VanSteenhouse et al |
| EPI_ISL_530657 | Lighthouse Lab in Glasgow                                                                                                                                                                                           | Wellcome Sanger Institute for the COVID-19 Genomics UK (COG-UK) consortium                                                 | Harper VanSteenhouse et al |
| EPI_ISL_530757 | Lighthouse Lab in Glasgow                                                                                                                                                                                           | Wellcome Sanger Institute for the COVID-19 Genomics UK (COG-UK) consortium                                                 | Harper VanSteenhouse et al |
| EPI_ISL_530453 | Lighthouse Lab in Glasgow                                                                                                                                                                                           | Wellcome Sanger Institute for the COVID-19 Genomics UK (COG-UK) consortium                                                 | Harper VanSteenhouse et al |
| EPI_ISL_530432 | Lighthouse Lab in Glasgow                                                                                                                                                                                           | Wellcome Sanger Institute for the COVID-19 Genomics UK (COG-UK) consortium                                                 | Harper VanSteenhouse et al |
| EPI_ISL_540324 | Lighthouse Lab in Glasgow                                                                                                                                                                                           | Wellcome Sanger Institute for the COVID-19 Genomics UK (COG-UK) consortium                                                 | Harper VanSteenhouse et al |
| EPI_ISL_540277 | Lighthouse Lab in Glasgow                                                                                                                                                                                           | Wellcome Sanger Institute for the COVID-19 Genomics UK (COG-UK) consortium                                                 | Harper VanSteenhouse et al |
| EPI_ISL_540286 | Lighthouse Lab in Glasgow                                                                                                                                                                                           | Wellcome Sanger Institute for the COVID-19 Genomics UK (COG-UK) consortium                                                 | Harper VanSteenhouse et al |

|                |                                                                                                           |                                                                                                             |                               |
|----------------|-----------------------------------------------------------------------------------------------------------|-------------------------------------------------------------------------------------------------------------|-------------------------------|
| EPI_ISL_540236 | Lighthouse Lab in Glasgow                                                                                 | Wellcome Sanger Institute for the COVID-19 Genomics UK (COG-UK) consortium                                  | Harper VanSteenhouse et al    |
| EPI_ISL_540254 | Lighthouse Lab in Glasgow                                                                                 | Wellcome Sanger Institute for the COVID-19 Genomics UK (COG-UK) consortium                                  | Harper VanSteenhouse et al    |
| EPI_ISL_540271 | Lighthouse Lab in Glasgow                                                                                 | Wellcome Sanger Institute for the COVID-19 Genomics UK (COG-UK) consortium                                  | Harper VanSteenhouse et al    |
| EPI_ISL_577346 | University of Exeter                                                                                      | COVID-19 Genomics UK (COG-UK) Consortium                                                                    | Ben Temperton et al           |
| EPI_ISL_590898 | Furst Medical Laboratory                                                                                  | Norwegian Institute of Public Health, Department of Virology                                                | Kathrine Stene-Johansen et al |
| EPI_ISL_668414 | Innlandet Hospital Trust, Division Lillehammer, Department for Medical Microbiology                       | Norwegian Institute of Public Health, Department of Virology                                                | Kathrine Stene-Johansen et al |
| EPI_ISL_668428 | Hospital of Southern Norway - Kristiansand, Department of Medical Microbiology                            | Norwegian Institute of Public Health, Department of Virology                                                | Kathrine Stene-Johansen et al |
| EPI_ISL_415152 | Gorgas Memorial Institute for Health Studies                                                              | Gorgas Memorial Institute for Health Studies                                                                | Danilo Franco et al           |
| EPI_ISL_415787 | Laboratorio de Referencia Nacional de Virus Respiratorio. Instituto Nacional de Salud. Peru               | Laboratorio de Referencia Nacional de Biotecnología y Biología Molecular. Instituto Nacional de Salud. Peru | Carlos Padilla Rojas et al    |
| EPI_ISL_413647 | Centro Hospital do Porto, E.P.E. - H. Geral de Santo Antonio                                              | Instituto Nacional de Saude (INSA)                                                                          | Raquel Guiomar et al          |
| EPI_ISL_413648 | Centro Hospitalar e Universitário de Sao Joao, Porto                                                      | Instituto Nacional de Saude (INSA)                                                                          | Raquel Guiomar et al          |
| EPI_ISL_512978 | Pathogen Genomics Lab King Abdullah University of Science and Technology(KAUST)                           | Pathogen Genomics Lab King Abdullah University of Science and Technology(KAUST)                             | Sara Mfarrej et al            |
| EPI_ISL_606189 | Lighthouse Lab in Alderley Park                                                                           | Wellcome Sanger Institute for the COVID-19 Genomics UK (COG-UK) consortium                                  | Jacquelyn Wynn et al          |
| EPI_ISL_413221 | West of Scotland Specialist Virology Centre, NHSGGC                                                       | MRC-University of Glasgow Centre for Virus Research                                                         | Emma Thomson et al            |
| EPI_ISL_414024 | West of Scotland Specialist Virology Centre, NHSGGC                                                       | MRC-University of Glasgow Centre for Virus Research                                                         | Emma Thomson et al            |
| EPI_ISL_414025 | West of Scotland Specialist Virology Centre, NHSGGC                                                       | MRC-University of Glasgow Centre for Virus Research                                                         | Emma Thomson et al            |
| EPI_ISL_414026 | West of Scotland Specialist Virology Centre, NHSGGC                                                       | MRC-University of Glasgow Centre for Virus Research                                                         | Emma Thomson et al            |
| EPI_ISL_414027 | West of Scotland Specialist Virology Centre, NHSGGC                                                       | MRC-University of Glasgow Centre for Virus Research                                                         | Emma Thomson et al            |
| EPI_ISL_415628 | West of Scotland Specialist Virology Centre, NHSGGC                                                       | MRC-University of Glasgow Centre for Virus Research                                                         | Kathy Smollett et al          |
| EPI_ISL_415630 | West of Scotland Specialist Virology Centre, NHSGGC                                                       | MRC-University of Glasgow Centre for Virus Research                                                         | Kathy Smollett et al          |
| EPI_ISL_415631 | West of Scotland Specialist Virology Centre, NHSGGC                                                       | MRC-University of Glasgow Centre for Virus Research                                                         | Kathy Smollett et al          |
| EPI_ISL_540823 | Lighthouse Lab in Glasgow / MRC-University of Glasgow Centre for Virus Research                           | COVID-19 Genomics UK (COG-UK) Consortium                                                                    | Ana da Silva Filipe et al     |
| EPI_ISL_540824 | Lighthouse Lab in Glasgow / MRC-University of Glasgow Centre for Virus Research                           | COVID-19 Genomics UK (COG-UK) Consortium                                                                    | Ana da Silva Filipe et al     |
| EPI_ISL_540826 | Lighthouse Lab in Glasgow / MRC-University of Glasgow Centre for Virus Research                           | COVID-19 Genomics UK (COG-UK) Consortium                                                                    | Ana da Silva Filipe et al     |
| EPI_ISL_540829 | Lighthouse Lab in Glasgow / MRC-University of Glasgow Centre for Virus Research                           | COVID-19 Genomics UK (COG-UK) Consortium                                                                    | Ana da Silva Filipe et al     |
| EPI_ISL_540830 | Lighthouse Lab in Glasgow / MRC-University of Glasgow Centre for Virus Research                           | COVID-19 Genomics UK (COG-UK) Consortium                                                                    | Ana da Silva Filipe et al     |
| EPI_ISL_540836 | Lighthouse Lab in Glasgow / MRC-University of Glasgow Centre for Virus Research                           | COVID-19 Genomics UK (COG-UK) Consortium                                                                    | Ana da Silva Filipe et al     |
| EPI_ISL_540837 | Lighthouse Lab in Glasgow / MRC-University of Glasgow Centre for Virus Research                           | COVID-19 Genomics UK (COG-UK) Consortium                                                                    | Ana da Silva Filipe et al     |
| EPI_ISL_540850 | Lighthouse Lab in Glasgow / MRC-University of Glasgow Centre for Virus Research                           | COVID-19 Genomics UK (COG-UK) Consortium                                                                    | Ana da Silva Filipe et al     |
| EPI_ISL_540865 | Lighthouse Lab in Glasgow / MRC-University of Glasgow Centre for Virus Research                           | COVID-19 Genomics UK (COG-UK) Consortium                                                                    | Ana da Silva Filipe et al     |
| EPI_ISL_540868 | Lighthouse Lab in Glasgow / MRC-University of Glasgow Centre for Virus Research                           | COVID-19 Genomics UK (COG-UK) Consortium                                                                    | Ana da Silva Filipe et al     |
| EPI_ISL_612124 | West of Scotland Specialist Virology Centre, NHSGGC / MRC-University of Glasgow Centre for Virus Research | COVID-19 Genomics UK (COG-UK) Consortium                                                                    | Ana da Silva Filipe et al     |
| EPI_ISL_612125 | West of Scotland Specialist Virology Centre, NHSGGC / MRC-University of Glasgow Centre for Virus Research | COVID-19 Genomics UK (COG-UK) Consortium                                                                    | Ana da Silva Filipe et al     |
| EPI_ISL_650523 | West of Scotland Specialist Virology Centre, NHSGGC / MRC-University of Glasgow Centre for Virus Research | COVID-19 Genomics UK (COG-UK) Consortium                                                                    | Ana da Silva Filipe et al     |



|                |                                                                                                                                                                                                 |                                                                            |                                           |
|----------------|-------------------------------------------------------------------------------------------------------------------------------------------------------------------------------------------------|----------------------------------------------------------------------------|-------------------------------------------|
| EPI_ISL_612128 | Virology Department, Royal Infirmary of Edinburgh, NHS Lothian / School of Biological Sciences, University of Edinburgh / Institute of Genetics and Molecular Medicine, University of Edinburgh | COVID-19 Genomics UK (COG-UK) Consortium                                   | McHugh M et al                            |
| EPI_ISL_612129 | Virology Department, Royal Infirmary of Edinburgh, NHS Lothian / School of Biological Sciences, University of Edinburgh / Institute of Genetics and Molecular Medicine, University of Edinburgh | COVID-19 Genomics UK (COG-UK) Consortium                                   | McHugh M et al                            |
| EPI_ISL_650167 | Virology Department, Royal Infirmary of Edinburgh, NHS Lothian / School of Biological Sciences, University of Edinburgh / Institute of Genetics and Molecular Medicine, University of Edinburgh | COVID-19 Genomics UK (COG-UK) Consortium                                   | McHugh M et al                            |
| EPI_ISL_651425 | Virology Department, Royal Infirmary of Edinburgh, NHS Lothian / School of Biological Sciences, University of Edinburgh / Institute of Genetics and Molecular Medicine, University of Edinburgh | COVID-19 Genomics UK (COG-UK) Consortium                                   | McHugh M et al                            |
| EPI_ISL_651426 | Virology Department, Royal Infirmary of Edinburgh, NHS Lothian / School of Biological Sciences, University of Edinburgh / Institute of Genetics and Molecular Medicine, University of Edinburgh | COVID-19 Genomics UK (COG-UK) Consortium                                   | McHugh M et al                            |
| EPI_ISL_651427 | Virology Department, Royal Infirmary of Edinburgh, NHS Lothian / School of Biological Sciences, University of Edinburgh / Institute of Genetics and Molecular Medicine, University of Edinburgh | COVID-19 Genomics UK (COG-UK) Consortium                                   | McHugh M et al                            |
| EPI_ISL_651428 | Virology Department, Royal Infirmary of Edinburgh, NHS Lothian / School of Biological Sciences, University of Edinburgh / Institute of Genetics and Molecular Medicine, University of Edinburgh | COVID-19 Genomics UK (COG-UK) Consortium                                   | McHugh M et al                            |
| EPI_ISL_665762 | Virology Department, Royal Infirmary of Edinburgh, NHS Lothian / School of Biological Sciences, University of Edinburgh / Institute of Genetics and Molecular Medicine, University of Edinburgh | COVID-19 Genomics UK (COG-UK) Consortium                                   | McHugh M et al                            |
| EPI_ISL_650531 | Virology Department, Royal Infirmary of Edinburgh, NHS Lothian / School of Biological Sciences, University of Edinburgh / Institute of Genetics and Molecular Medicine, University of Edinburgh | COVID-19 Genomics UK (COG-UK) Consortium                                   | McHugh M et al                            |
| EPI_ISL_625413 | Lighthouse Lab in Milton Keynes                                                                                                                                                                 | Wellcome Sanger Institute for the COVID-19 Genomics UK (COG-UK) consortium | The Lighthouse Lab in Milton Keynes et al |
| EPI_ISL_531569 | NHSGGC West of Scotland Specialist Virology Centre / MRC-University of Glasgow Centre for Virus Research                                                                                        | Wellcome Sanger Institute for the COVID-19 Genomics UK (COG-UK) consortium | Ana da Silva Filipe et al                 |
| EPI_ISL_530468 | NHSGGC West of Scotland Specialist Virology Centre / MRC-University of Glasgow Centre for Virus Research                                                                                        | Wellcome Sanger Institute for the COVID-19 Genomics UK (COG-UK) consortium | Ana da Silva Filipe et al                 |
| EPI_ISL_530435 | NHSGGC West of Scotland Specialist Virology Centre / MRC-University of Glasgow Centre for Virus Research                                                                                        | Wellcome Sanger Institute for the COVID-19 Genomics UK (COG-UK) consortium | Ana da Silva Filipe et al                 |
| EPI_ISL_568421 | Lighthouse Lab in Glasgow                                                                                                                                                                       | Wellcome Sanger Institute for the COVID-19 Genomics UK (COG-UK) consortium | Harper VanSteenhouse et al                |
| EPI_ISL_568464 | Lighthouse Lab in Glasgow                                                                                                                                                                       | Wellcome Sanger Institute for the COVID-19 Genomics UK (COG-UK) consortium | Harper VanSteenhouse et al                |
| EPI_ISL_568446 | Lighthouse Lab in Glasgow                                                                                                                                                                       | Wellcome Sanger Institute for the COVID-19 Genomics UK (COG-UK) consortium | Harper VanSteenhouse et al                |
| EPI_ISL_540391 | Lighthouse Lab in Glasgow                                                                                                                                                                       | Wellcome Sanger Institute for the COVID-19 Genomics UK (COG-UK) consortium | Harper VanSteenhouse et al                |
| EPI_ISL_568291 | Lighthouse Lab in Glasgow                                                                                                                                                                       | Wellcome Sanger Institute for the COVID-19 Genomics UK (COG-UK) consortium | Harper VanSteenhouse et al                |
| EPI_ISL_568356 | Lighthouse Lab in Glasgow                                                                                                                                                                       | Wellcome Sanger Institute for the COVID-19 Genomics UK (COG-UK) consortium | Harper VanSteenhouse et al                |
| EPI_ISL_568304 | Lighthouse Lab in Glasgow                                                                                                                                                                       | Wellcome Sanger Institute for the COVID-19 Genomics UK (COG-UK) consortium | Harper VanSteenhouse et al                |
| EPI_ISL_568325 | Lighthouse Lab in Glasgow                                                                                                                                                                       | Wellcome Sanger Institute for the COVID-19 Genomics UK (COG-UK) consortium | Harper VanSteenhouse et al                |
| EPI_ISL_568340 | Lighthouse Lab in Glasgow                                                                                                                                                                       | Wellcome Sanger Institute for the COVID-19 Genomics UK (COG-UK) consortium | Harper VanSteenhouse et al                |
| EPI_ISL_540040 | Lighthouse Lab in Glasgow                                                                                                                                                                       | Wellcome Sanger Institute for the COVID-19 Genomics UK (COG-UK) consortium | Harper VanSteenhouse et al                |
| EPI_ISL_568343 | Lighthouse Lab in Glasgow                                                                                                                                                                       | Wellcome Sanger Institute for the COVID-19 Genomics UK (COG-UK) consortium | Harper VanSteenhouse et al                |
| EPI_ISL_568335 | Lighthouse Lab in Glasgow                                                                                                                                                                       | Wellcome Sanger Institute for the COVID-19 Genomics UK (COG-UK) consortium | Harper VanSteenhouse et al                |
| EPI_ISL_568373 | Lighthouse Lab in Glasgow                                                                                                                                                                       | Wellcome Sanger Institute for the COVID-19 Genomics UK (COG-UK) consortium | Harper VanSteenhouse et al                |
| EPI_ISL_560040 | Oxford Viromics, NDM, University of Oxford; Oxford University Hospitals; Basingstoke and North Hampshire Hospital                                                                               | COVID-19 Genomics UK (COG-UK) Consortium                                   | Tanya Golubchik et al                     |
| EPI_ISL_560050 | Oxford Viromics, NDM, University of Oxford; Oxford University Hospitals; Basingstoke and North Hampshire Hospital                                                                               | COVID-19 Genomics UK (COG-UK) Consortium                                   | Tanya Golubchik et al                     |

|                |                                                                                                                                                                                                                     |                                                                            |                            |
|----------------|---------------------------------------------------------------------------------------------------------------------------------------------------------------------------------------------------------------------|----------------------------------------------------------------------------|----------------------------|
| EPI_ISL_560074 | Oxford Viroemics, NDM, University of Oxford; Oxford University Hospitals; Basingstoke and North Hampshire Hospital                                                                                                  | COVID-19 Genomics UK (COG-UK) Consortium                                   | Tanya Golubchik et al      |
| EPI_ISL_602095 | Lighthouse Lab in Glasgow                                                                                                                                                                                           | Wellcome Sanger Institute for the COVID-19 Genomics UK (COG-UK) consortium | Harper VanSteenhouse et al |
| EPI_ISL_602100 | Lighthouse Lab in Glasgow                                                                                                                                                                                           | Wellcome Sanger Institute for the COVID-19 Genomics UK (COG-UK) consortium | Harper VanSteenhouse et al |
| EPI_ISL_568224 | Lighthouse Lab in Glasgow                                                                                                                                                                                           | Wellcome Sanger Institute for the COVID-19 Genomics UK (COG-UK) consortium | Harper VanSteenhouse et al |
| EPI_ISL_568269 | Lighthouse Lab in Glasgow                                                                                                                                                                                           | Wellcome Sanger Institute for the COVID-19 Genomics UK (COG-UK) consortium | Harper VanSteenhouse et al |
| EPI_ISL_568229 | Lighthouse Lab in Glasgow                                                                                                                                                                                           | Wellcome Sanger Institute for the COVID-19 Genomics UK (COG-UK) consortium | Harper VanSteenhouse et al |
| EPI_ISL_576016 | Lighthouse Lab in Glasgow                                                                                                                                                                                           | Wellcome Sanger Institute for the COVID-19 Genomics UK (COG-UK) consortium | Harper VanSteenhouse et al |
| EPI_ISL_576067 | Lighthouse Lab in Glasgow                                                                                                                                                                                           | Wellcome Sanger Institute for the COVID-19 Genomics UK (COG-UK) consortium | Harper VanSteenhouse et al |
| EPI_ISL_602019 | Lighthouse Lab in Glasgow                                                                                                                                                                                           | Wellcome Sanger Institute for the COVID-19 Genomics UK (COG-UK) consortium | Harper VanSteenhouse et al |
| EPI_ISL_602009 | Lighthouse Lab in Glasgow                                                                                                                                                                                           | Wellcome Sanger Institute for the COVID-19 Genomics UK (COG-UK) consortium | Harper VanSteenhouse et al |
| EPI_ISL_575339 | Lighthouse Lab in Glasgow                                                                                                                                                                                           | Wellcome Sanger Institute for the COVID-19 Genomics UK (COG-UK) consortium | Harper VanSteenhouse et al |
| EPI_ISL_575363 | Lighthouse Lab in Glasgow                                                                                                                                                                                           | Wellcome Sanger Institute for the COVID-19 Genomics UK (COG-UK) consortium | Harper VanSteenhouse et al |
| EPI_ISL_601099 | Lighthouse Lab in Glasgow                                                                                                                                                                                           | Wellcome Sanger Institute for the COVID-19 Genomics UK (COG-UK) consortium | Harper VanSteenhouse et al |
| EPI_ISL_575365 | Lighthouse Lab in Glasgow                                                                                                                                                                                           | Wellcome Sanger Institute for the COVID-19 Genomics UK (COG-UK) consortium | Harper VanSteenhouse et al |
| EPI_ISL_575395 | Lighthouse Lab in Glasgow                                                                                                                                                                                           | Wellcome Sanger Institute for the COVID-19 Genomics UK (COG-UK) consortium | Harper VanSteenhouse et al |
| EPI_ISL_601101 | Lighthouse Lab in Glasgow                                                                                                                                                                                           | Wellcome Sanger Institute for the COVID-19 Genomics UK (COG-UK) consortium | Harper VanSteenhouse et al |
| EPI_ISL_601185 | Lighthouse Lab in Glasgow                                                                                                                                                                                           | Wellcome Sanger Institute for the COVID-19 Genomics UK (COG-UK) consortium | Harper VanSteenhouse et al |
| EPI_ISL_601102 | Lighthouse Lab in Glasgow                                                                                                                                                                                           | Wellcome Sanger Institute for the COVID-19 Genomics UK (COG-UK) consortium | Harper VanSteenhouse et al |
| EPI_ISL_599735 | Lighthouse Lab in Glasgow                                                                                                                                                                                           | Wellcome Sanger Institute for the COVID-19 Genomics UK (COG-UK) consortium | Harper VanSteenhouse et al |
| EPI_ISL_599629 | Lighthouse Lab in Glasgow                                                                                                                                                                                           | Wellcome Sanger Institute for the COVID-19 Genomics UK (COG-UK) consortium | Harper VanSteenhouse et al |
| EPI_ISL_599489 | Lighthouse Lab in Glasgow                                                                                                                                                                                           | Wellcome Sanger Institute for the COVID-19 Genomics UK (COG-UK) consortium | Harper VanSteenhouse et al |
| EPI_ISL_599607 | Lighthouse Lab in Glasgow                                                                                                                                                                                           | Wellcome Sanger Institute for the COVID-19 Genomics UK (COG-UK) consortium | Harper VanSteenhouse et al |
| EPI_ISL_601229 | Lighthouse Lab in Glasgow                                                                                                                                                                                           | Wellcome Sanger Institute for the COVID-19 Genomics UK (COG-UK) consortium | Harper VanSteenhouse et al |
| EPI_ISL_601222 | Lighthouse Lab in Glasgow                                                                                                                                                                                           | Wellcome Sanger Institute for the COVID-19 Genomics UK (COG-UK) consortium | Harper VanSteenhouse et al |
| EPI_ISL_585520 | Northumbria University / South Tees Hospitals NHS Foundation Trust / North Cumbria Integrated Care NHS Foundation Trust / North Tees and Hartlepool NHS Foundation Trust / Newcastle Hospitals NHS Foundation Trust | COVID-19 Genomics UK (COG-UK) Consortium                                   | Darren L Smith et al       |
| EPI_ISL_600976 | Lighthouse Lab in Glasgow                                                                                                                                                                                           | Wellcome Sanger Institute for the COVID-19 Genomics UK (COG-UK) consortium | Harper VanSteenhouse et al |
| EPI_ISL_601041 | Lighthouse Lab in Glasgow                                                                                                                                                                                           | Wellcome Sanger Institute for the COVID-19 Genomics UK (COG-UK) consortium | Harper VanSteenhouse et al |
| EPI_ISL_601034 | Lighthouse Lab in Glasgow                                                                                                                                                                                           | Wellcome Sanger Institute for the COVID-19 Genomics UK (COG-UK) consortium | Harper VanSteenhouse et al |
| EPI_ISL_601032 | Lighthouse Lab in Glasgow                                                                                                                                                                                           | Wellcome Sanger Institute for the COVID-19 Genomics UK (COG-UK) consortium | Harper VanSteenhouse et al |
| EPI_ISL_601009 | Lighthouse Lab in Glasgow                                                                                                                                                                                           | Wellcome Sanger Institute for the COVID-19 Genomics UK (COG-UK) consortium | Harper VanSteenhouse et al |





|                |                                                                                                                                                                                  |                                                                            |                            |
|----------------|----------------------------------------------------------------------------------------------------------------------------------------------------------------------------------|----------------------------------------------------------------------------|----------------------------|
| EPI_ISL_600205 | Lighthouse Lab in Glasgow                                                                                                                                                        | Wellcome Sanger Institute for the COVID-19 Genomics UK (COG-UK) consortium | Harper VanSteenhouse et al |
| EPI_ISL_585561 | University of Exeter                                                                                                                                                             | COVID-19 Genomics UK (COG-UK) Consortium                                   | Ben Temperton et al        |
| EPI_ISL_585563 | University of Exeter                                                                                                                                                             | COVID-19 Genomics UK (COG-UK) Consortium                                   | Ben Temperton et al        |
| EPI_ISL_585570 | University of Exeter                                                                                                                                                             | COVID-19 Genomics UK (COG-UK) Consortium                                   | Ben Temperton et al        |
| EPI_ISL_599227 | Lighthouse Lab in Glasgow                                                                                                                                                        | Wellcome Sanger Institute for the COVID-19 Genomics UK (COG-UK) consortium | Harper VanSteenhouse et al |
| EPI_ISL_599238 | Lighthouse Lab in Glasgow                                                                                                                                                        | Wellcome Sanger Institute for the COVID-19 Genomics UK (COG-UK) consortium | Harper VanSteenhouse et al |
| EPI_ISL_599176 | Lighthouse Lab in Glasgow                                                                                                                                                        | Wellcome Sanger Institute for the COVID-19 Genomics UK (COG-UK) consortium | Harper VanSteenhouse et al |
| EPI_ISL_599248 | Lighthouse Lab in Glasgow                                                                                                                                                        | Wellcome Sanger Institute for the COVID-19 Genomics UK (COG-UK) consortium | Harper VanSteenhouse et al |
| EPI_ISL_599255 | Lighthouse Lab in Glasgow                                                                                                                                                        | Wellcome Sanger Institute for the COVID-19 Genomics UK (COG-UK) consortium | Harper VanSteenhouse et al |
| EPI_ISL_599177 | Lighthouse Lab in Glasgow                                                                                                                                                        | Wellcome Sanger Institute for the COVID-19 Genomics UK (COG-UK) consortium | Harper VanSteenhouse et al |
| EPI_ISL_599173 | Lighthouse Lab in Glasgow                                                                                                                                                        | Wellcome Sanger Institute for the COVID-19 Genomics UK (COG-UK) consortium | Harper VanSteenhouse et al |
| EPI_ISL_599189 | Lighthouse Lab in Glasgow                                                                                                                                                        | Wellcome Sanger Institute for the COVID-19 Genomics UK (COG-UK) consortium | Harper VanSteenhouse et al |
| EPI_ISL_585598 | Quadram Institute Bioscience                                                                                                                                                     | COVID-19 Genomics UK (COG-UK) Consortium                                   | Dave J. Baker et al        |
| EPI_ISL_585601 | Quadram Institute Bioscience                                                                                                                                                     | COVID-19 Genomics UK (COG-UK) Consortium                                   | Dave J. Baker et al        |
| EPI_ISL_599463 | Lighthouse Lab in Glasgow                                                                                                                                                        | Wellcome Sanger Institute for the COVID-19 Genomics UK (COG-UK) consortium | Harper VanSteenhouse et al |
| EPI_ISL_598912 | Lighthouse Lab in Glasgow                                                                                                                                                        | Wellcome Sanger Institute for the COVID-19 Genomics UK (COG-UK) consortium | Harper VanSteenhouse et al |
| EPI_ISL_598908 | Lighthouse Lab in Glasgow                                                                                                                                                        | Wellcome Sanger Institute for the COVID-19 Genomics UK (COG-UK) consortium | Harper VanSteenhouse et al |
| EPI_ISL_599028 | Lighthouse Lab in Glasgow                                                                                                                                                        | Wellcome Sanger Institute for the COVID-19 Genomics UK (COG-UK) consortium | Harper VanSteenhouse et al |
| EPI_ISL_598923 | Lighthouse Lab in Glasgow                                                                                                                                                        | Wellcome Sanger Institute for the COVID-19 Genomics UK (COG-UK) consortium | Harper VanSteenhouse et al |
| EPI_ISL_599101 | Lighthouse Lab in Glasgow                                                                                                                                                        | Wellcome Sanger Institute for the COVID-19 Genomics UK (COG-UK) consortium | Harper VanSteenhouse et al |
| EPI_ISL_598931 | Lighthouse Lab in Glasgow                                                                                                                                                        | Wellcome Sanger Institute for the COVID-19 Genomics UK (COG-UK) consortium | Harper VanSteenhouse et al |
| EPI_ISL_598936 | Lighthouse Lab in Glasgow                                                                                                                                                        | Wellcome Sanger Institute for the COVID-19 Genomics UK (COG-UK) consortium | Harper VanSteenhouse et al |
| EPI_ISL_598953 | Lighthouse Lab in Glasgow                                                                                                                                                        | Wellcome Sanger Institute for the COVID-19 Genomics UK (COG-UK) consortium | Harper VanSteenhouse et al |
| EPI_ISL_599034 | Lighthouse Lab in Glasgow                                                                                                                                                        | Wellcome Sanger Institute for the COVID-19 Genomics UK (COG-UK) consortium | Harper VanSteenhouse et al |
| EPI_ISL_598948 | Lighthouse Lab in Glasgow                                                                                                                                                        | Wellcome Sanger Institute for the COVID-19 Genomics UK (COG-UK) consortium | Harper VanSteenhouse et al |
| EPI_ISL_599050 | Lighthouse Lab in Glasgow                                                                                                                                                        | Wellcome Sanger Institute for the COVID-19 Genomics UK (COG-UK) consortium | Harper VanSteenhouse et al |
| EPI_ISL_599011 | Lighthouse Lab in Glasgow                                                                                                                                                        | Wellcome Sanger Institute for the COVID-19 Genomics UK (COG-UK) consortium | Harper VanSteenhouse et al |
| EPI_ISL_598999 | Lighthouse Lab in Glasgow                                                                                                                                                        | Wellcome Sanger Institute for the COVID-19 Genomics UK (COG-UK) consortium | Harper VanSteenhouse et al |
| EPI_ISL_627250 | Oxford Viromics, NDM, University of Oxford; Oxford University Hospitals; Basingstoke and North Hampshire Hospital                                                                | COVID-19 Genomics UK (COG-UK) Consortium                                   | Tanya Golubchik et al      |
| EPI_ISL_627252 | Virology Department, Sheffield Teaching Hospitals NHS Foundation Trust/Department of Infection, Immunity and Cardiovascular Disease, The Medical School, University of Sheffield | COVID-19 Genomics UK (COG-UK) Consortium                                   | Thushan de Silva et al     |
| EPI_ISL_627254 | Virology Department, Sheffield Teaching Hospitals NHS Foundation Trust/Department of Infection, Immunity and Cardiovascular Disease, The Medical School, University of Sheffield | COVID-19 Genomics UK (COG-UK) Consortium                                   | Thushan de Silva et al     |
| EPI_ISL_595942 | Quadram Institute Bioscience                                                                                                                                                     | COVID-19 Genomics UK (COG-UK) Consortium                                   | Dave J. Baker et al        |

|                |                                                                                                                                                                                                                     |                                                                            |                            |
|----------------|---------------------------------------------------------------------------------------------------------------------------------------------------------------------------------------------------------------------|----------------------------------------------------------------------------|----------------------------|
| EPI_ISL_627257 | Oxford Viromics, NDM, University of Oxford; Oxford University Hospitals; Basingstoke and North Hampshire Hospital                                                                                                   | COVID-19 Genomics UK (COG-UK) Consortium                                   | Tanya Golubchik et al      |
| EPI_ISL_627259 | Oxford Viromics, NDM, University of Oxford; Oxford University Hospitals; Basingstoke and North Hampshire Hospital                                                                                                   | COVID-19 Genomics UK (COG-UK) Consortium                                   | Tanya Golubchik et al      |
| EPI_ISL_596102 | Quadram Institute Bioscience                                                                                                                                                                                        | COVID-19 Genomics UK (COG-UK) Consortium                                   | Dave J. Baker et al        |
| EPI_ISL_665432 | Northumbria University / South Tees Hospitals NHS Foundation Trust / North Cumbria Integrated Care NHS Foundation Trust / North Tees and Hartlepool NHS Foundation Trust / Newcastle Hospitals NHS Foundation Trust | COVID-19 Genomics UK (COG-UK) Consortium                                   | Darren L Smith et al       |
| EPI_ISL_596161 | Quadram Institute Bioscience                                                                                                                                                                                        | COVID-19 Genomics UK (COG-UK) Consortium                                   | Dave J. Baker et al        |
| EPI_ISL_596164 | Quadram Institute Bioscience                                                                                                                                                                                        | COVID-19 Genomics UK (COG-UK) Consortium                                   | Dave J. Baker et al        |
| EPI_ISL_612158 | Queens Medical Centre, Clinical Microbiology Department / DeepSeq Nottingham                                                                                                                                        | COVID-19 Genomics UK (COG-UK) Consortium                                   | Gemma Clark et al          |
| EPI_ISL_638089 | Oxford Viromics, NDM, University of Oxford; Oxford University Hospitals; Basingstoke and North Hampshire Hospital                                                                                                   | COVID-19 Genomics UK (COG-UK) Consortium                                   | Tanya Golubchik et al      |
| EPI_ISL_643239 | Lighthouse Lab in Glasgow                                                                                                                                                                                           | Wellcome Sanger Institute for the COVID-19 Genomics UK (COG-UK) Consortium | Harper VanSteenhouse et al |
| EPI_ISL_625384 | Lighthouse Lab in Glasgow                                                                                                                                                                                           | Wellcome Sanger Institute for the COVID-19 Genomics UK (COG-UK) consortium | Harper VanSteenhouse et al |
| EPI_ISL_625386 | Lighthouse Lab in Glasgow                                                                                                                                                                                           | Wellcome Sanger Institute for the COVID-19 Genomics UK (COG-UK) consortium | Harper VanSteenhouse et al |
| EPI_ISL_625347 | Lighthouse Lab in Glasgow                                                                                                                                                                                           | Wellcome Sanger Institute for the COVID-19 Genomics UK (COG-UK) consortium | Harper VanSteenhouse et al |
| EPI_ISL_625373 | Lighthouse Lab in Glasgow                                                                                                                                                                                           | Wellcome Sanger Institute for the COVID-19 Genomics UK (COG-UK) consortium | Harper VanSteenhouse et al |
| EPI_ISL_625390 | Lighthouse Lab in Glasgow                                                                                                                                                                                           | Wellcome Sanger Institute for the COVID-19 Genomics UK (COG-UK) consortium | Harper VanSteenhouse et al |
| EPI_ISL_625379 | Lighthouse Lab in Glasgow                                                                                                                                                                                           | Wellcome Sanger Institute for the COVID-19 Genomics UK (COG-UK) consortium | Harper VanSteenhouse et al |
| EPI_ISL_624176 | Lighthouse Lab in Glasgow                                                                                                                                                                                           | Wellcome Sanger Institute for the COVID-19 Genomics UK (COG-UK) consortium | Harper VanSteenhouse et al |
| EPI_ISL_624010 | Lighthouse Lab in Glasgow                                                                                                                                                                                           | Wellcome Sanger Institute for the COVID-19 Genomics UK (COG-UK) consortium | Harper VanSteenhouse et al |
| EPI_ISL_624067 | Lighthouse Lab in Glasgow                                                                                                                                                                                           | Wellcome Sanger Institute for the COVID-19 Genomics UK (COG-UK) consortium | Harper VanSteenhouse et al |
| EPI_ISL_651482 | Oxford Viromics, NDM, University of Oxford; Oxford University Hospitals; Basingstoke and North Hampshire Hospital                                                                                                   | COVID-19 Genomics UK (COG-UK) Consortium                                   | Tanya Golubchik et al      |
| EPI_ISL_651483 | Oxford Viromics, NDM, University of Oxford; Oxford University Hospitals; Basingstoke and North Hampshire Hospital                                                                                                   | COVID-19 Genomics UK (COG-UK) Consortium                                   | Tanya Golubchik et al      |
| EPI_ISL_649731 | Lighthouse Lab in Glasgow                                                                                                                                                                                           | Wellcome Sanger Institute for the COVID-19 Genomics UK (COG-UK) Consortium | Harper VanSteenhouse et al |
| EPI_ISL_649721 | Lighthouse Lab in Glasgow                                                                                                                                                                                           | Wellcome Sanger Institute for the COVID-19 Genomics UK (COG-UK) Consortium | Harper VanSteenhouse et al |
| EPI_ISL_644039 | Lighthouse Lab in Glasgow                                                                                                                                                                                           | Wellcome Sanger Institute for the COVID-19 Genomics UK (COG-UK) Consortium | Harper VanSteenhouse et al |
| EPI_ISL_644009 | Lighthouse Lab in Glasgow                                                                                                                                                                                           | Wellcome Sanger Institute for the COVID-19 Genomics UK (COG-UK) Consortium | Harper VanSteenhouse et al |
| EPI_ISL_649743 | Lighthouse Lab in Glasgow                                                                                                                                                                                           | Wellcome Sanger Institute for the COVID-19 Genomics UK (COG-UK) Consortium | Harper VanSteenhouse et al |
| EPI_ISL_649647 | Lighthouse Lab in Glasgow                                                                                                                                                                                           | Wellcome Sanger Institute for the COVID-19 Genomics UK (COG-UK) Consortium | Harper VanSteenhouse et al |
| EPI_ISL_665271 | Northumbria University / South Tees Hospitals NHS Foundation Trust / North Cumbria Integrated Care NHS Foundation Trust / North Tees and Hartlepool NHS Foundation Trust / Newcastle Hospitals NHS Foundation Trust | COVID-19 Genomics UK (COG-UK) Consortium                                   | Darren L Smith et al       |
| EPI_ISL_649609 | Lighthouse Lab in Glasgow                                                                                                                                                                                           | Wellcome Sanger Institute for the COVID-19 Genomics UK (COG-UK) Consortium | Harper VanSteenhouse et al |
| EPI_ISL_676411 | Lighthouse Lab in Glasgow                                                                                                                                                                                           | Wellcome Sanger Institute for the COVID-19 Genomics UK (COG-UK) Consortium | Harper VanSteenhouse et al |
| EPI_ISL_676412 | Lighthouse Lab in Glasgow                                                                                                                                                                                           | Wellcome Sanger Institute for the COVID-19 Genomics UK (COG-UK) Consortium | Harper VanSteenhouse et al |









|                |                                                                                                                                              |                                                                                                                                                                                         |                           |
|----------------|----------------------------------------------------------------------------------------------------------------------------------------------|-----------------------------------------------------------------------------------------------------------------------------------------------------------------------------------------|---------------------------|
| EPI_ISL_416401 | Shanghai Public Health Clinical Center, Shanghai Medical College, Fudan University                                                           | National Research Center for Translational Medicine (Shanghai), Ruijin Hospital affiliated to Shanghai Jiao Tong University School of Medicine & Shanghai Public Health Clinical Center | Shengyue Wang et al       |
| EPI_ISL_416402 | Shanghai Public Health Clinical Center, Shanghai Medical College, Fudan University                                                           | National Research Center for Translational Medicine (Shanghai), Ruijin Hospital affiliated to Shanghai Jiao Tong University School of Medicine & Shanghai Public Health Clinical Center | Shengyue Wang et al       |
| EPI_ISL_416403 | Shanghai Public Health Clinical Center, Shanghai Medical College, Fudan University                                                           | National Research Center for Translational Medicine (Shanghai), Ruijin Hospital affiliated to Shanghai Jiao Tong University School of Medicine & Shanghai Public Health Clinical Center | Shengyue Wang et al       |
| EPI_ISL_416404 | Shanghai Public Health Clinical Center, Shanghai Medical College, Fudan University                                                           | National Research Center for Translational Medicine (Shanghai), Ruijin Hospital affiliated to Shanghai Jiao Tong University School of Medicine & Shanghai Public Health Clinical Center | Shengyue Wang et al       |
| EPI_ISL_416405 | Shanghai Public Health Clinical Center, Shanghai Medical College, Fudan University                                                           | National Research Center for Translational Medicine (Shanghai), Ruijin Hospital affiliated to Shanghai Jiao Tong University School of Medicine & Shanghai Public Health Clinical Center | Shengyue Wang et al       |
| EPI_ISL_416406 | Shanghai Public Health Clinical Center, Shanghai Medical College, Fudan University                                                           | National Research Center for Translational Medicine (Shanghai), Ruijin Hospital affiliated to Shanghai Jiao Tong University School of Medicine & Shanghai Public Health Clinical Center | Shengyue Wang et al       |
| EPI_ISL_416407 | Shanghai Public Health Clinical Center, Shanghai Medical College, Fudan University                                                           | National Research Center for Translational Medicine (Shanghai), Ruijin Hospital affiliated to Shanghai Jiao Tong University School of Medicine & Shanghai Public Health Clinical Center | Shengyue Wang et al       |
| EPI_ISL_416408 | Shanghai Public Health Clinical Center, Shanghai Medical College, Fudan University                                                           | National Research Center for Translational Medicine (Shanghai), Ruijin Hospital affiliated to Shanghai Jiao Tong University School of Medicine & Shanghai Public Health Clinical Center | Shengyue Wang et al       |
| EPI_ISL_416409 | Shanghai Public Health Clinical Center, Shanghai Medical College, Fudan University                                                           | National Research Center for Translational Medicine (Shanghai), Ruijin Hospital affiliated to Shanghai Jiao Tong University School of Medicine & Shanghai Public Health Clinical Center | Shengyue Wang et al       |
| EPI_ISL_406030 | The University of Hong Kong - Shenzhen Hospital                                                                                              | Li Ka Shing Faculty of Medicine, The University of Hong Kong                                                                                                                            | Chan et al                |
| EPI_ISL_405839 | The University of Hong Kong - Shenzhen Hospital                                                                                              | Li Ka Shing Faculty of Medicine, The University of Hong Kong                                                                                                                            | Chan et al                |
| EPI_ISL_406593 | Shenzhen Key Laboratory of Pathogen and Immunity, National Clinical Research Center for Infectious Disease, Shenzhen Third People's Hospital | Shenzhen Key Laboratory of Pathogen and Immunity, National Clinical Research Center for Infectious Disease, Shenzhen Third People's Hospital                                            | Yang Yang et al           |
| EPI_ISL_406594 | Shenzhen Key Laboratory of Pathogen and Immunity, National Clinical Research Center for Infectious Disease, Shenzhen Third People's Hospital | Shenzhen Key Laboratory of Pathogen and Immunity, National Clinical Research Center for Infectious Disease, Shenzhen Third People's Hospital                                            | Yang Yang et al           |
| EPI_ISL_406595 | Shenzhen Key Laboratory of Pathogen and Immunity, National Clinical Research Center for Infectious Disease, Shenzhen Third People's Hospital | Shenzhen Key Laboratory of Pathogen and Immunity, National Clinical Research Center for Infectious Disease, Shenzhen Third People's Hospital                                            | Yang Yang et al           |
| EPI_ISL_408484 | National Institute for Viral Disease Control and Prevention, China CDC                                                                       | National Institute for Viral Disease Control & Prevention, CCDC                                                                                                                         | Wenjje Tan et al          |
| EPI_ISL_406973 | Singapore General Hospital                                                                                                                   | National Public Health Laboratory                                                                                                                                                       | Mak et al                 |
| EPI_ISL_410716 | National Public Health Laboratory, National Centre for Infectious Diseases                                                                   | National Centre for Infectious Diseases, National Centre for Infectious Diseases                                                                                                        | Octavia S et al           |
| EPI_ISL_410719 | National Public Health Laboratory                                                                                                            | National Public Health Laboratory                                                                                                                                                       | Octavia S et al           |
| EPI_ISL_414378 | National Centre for Infectious Diseases                                                                                                      | Programme in Emerging Infectious Diseases, Duke-NUS Medical School                                                                                                                      | Danielle E Anderson et al |
| EPI_ISL_414379 | National Centre for Infectious Diseases                                                                                                      | Programme in Emerging Infectious Diseases, Duke-NUS Medical School                                                                                                                      | Danielle E Anderson et al |
| EPI_ISL_414380 | National Centre for Infectious Diseases                                                                                                      | Programme in Emerging Infectious Diseases, Duke-NUS Medical School                                                                                                                      | Danielle E Anderson et al |
| EPI_ISL_407987 | Singapore General Hospital                                                                                                                   | Programme in Emerging Infectious Diseases, Duke-NUS Medical School                                                                                                                      | Danielle E Anderson et al |
| EPI_ISL_407988 | National Centre for Infectious Diseases                                                                                                      | Programme in Emerging Infectious Diseases, Duke-NUS Medical School                                                                                                                      | Danielle E Anderson et al |
| EPI_ISL_410535 | National Centre for Infectious Diseases                                                                                                      | Programme in Emerging Infectious Diseases, Duke-NUS Medical School                                                                                                                      | Danielle E Anderson et al |
| EPI_ISL_410536 | Singapore General Hospital, Molecular Laboratory, Division of Pathology                                                                      | Programme in Emerging Infectious Diseases, Duke-NUS Medical School                                                                                                                      | Danielle E Anderson et al |
| EPI_ISL_410537 | Singapore General Hospital, Molecular Laboratory, Division of Pathology                                                                      | Programme in Emerging Infectious Diseases, Duke-NUS Medical School                                                                                                                      | Danielle E Anderson et al |
| EPI_ISL_410713 | National Public Health Laboratory, National Centre for Infectious Diseases                                                                   | National Public Health Laboratory, National Centre for Infectious Diseases                                                                                                              | Octavia S et al           |
| EPI_ISL_410714 | National Public Health Laboratory, National Centre for Infectious Diseases                                                                   | National Public Health Laboratory, National Centre for Infectious Diseases                                                                                                              | Octavia S et al           |



|                |                                                                                        |                                                                                                   |                     |
|----------------|----------------------------------------------------------------------------------------|---------------------------------------------------------------------------------------------------|---------------------|
| EPI_ISL_410715 | National Public Health Laboratory, National Centre for Infectious Diseases             | National Public Health Laboratory, National Centre for Infectious Diseases                        | Octavia S et al     |
| EPI_ISL_635203 | Institute of Microbiology and Immunology, Faculty of Medicine, University of Ljubljana | Institute of Microbiology and Immunology, Faculty of Medicine, University of Ljubljana            | Samo Zakotnik et al |
| EPI_ISL_635204 | Institute of Microbiology and Immunology, Faculty of Medicine, University of Ljubljana | The National Laboratory of Health, Environment and Food - Centre for Medical Microbiology Maribor | Samo Zakotnik et al |
| EPI_ISL_635202 | Institute of Microbiology and Immunology, Faculty of Medicine, University of Ljubljana | Institute of Microbiology and Immunology, Faculty of Medicine, University of Ljubljana            | Samo Zakotnik et al |
| EPI_ISL_636459 | Institute of Microbiology and Immunology, Faculty of Medicine, University of Ljubljana | Institute of Microbiology and Immunology, Faculty of Medicine, University of Ljubljana            | Samo Zakotnik et al |
| EPI_ISL_660605 | NHLS-IALCH                                                                             | KRISP, KZN Research Innovation and Sequencing Platform                                            | Giandhari J et al   |
| EPI_ISL_660606 | NHLS-IALCH                                                                             | KRISP, KZN Research Innovation and Sequencing Platform                                            | Giandhari J et al   |
| EPI_ISL_660608 | NHLS-IALCH                                                                             | KRISP, KZN Research Innovation and Sequencing Platform                                            | Giandhari J et al   |
| EPI_ISL_660609 | NHLS-IALCH                                                                             | KRISP, KZN Research Innovation and Sequencing Platform                                            | Giandhari J et al   |
| EPI_ISL_660610 | NHLS-IALCH                                                                             | KRISP, KZN Research Innovation and Sequencing Platform                                            | Giandhari J et al   |
| EPI_ISL_660611 | NHLS-IALCH                                                                             | KRISP, KZN Research Innovation and Sequencing Platform                                            | Giandhari J et al   |
| EPI_ISL_660612 | NHLS-IALCH                                                                             | KRISP, KZN Research Innovation and Sequencing Platform                                            | Giandhari J et al   |
| EPI_ISL_660613 | NHLS-IALCH                                                                             | KRISP, KZN Research Innovation and Sequencing Platform                                            | Giandhari J et al   |
| EPI_ISL_660614 | NHLS-IALCH                                                                             | KRISP, KZN Research Innovation and Sequencing Platform                                            | Giandhari J et al   |
| EPI_ISL_660615 | NHLS-IALCH                                                                             | KRISP, KZN Research Innovation and Sequencing Platform                                            | Giandhari J et al   |
| EPI_ISL_678572 | Netcare                                                                                | KRISP, KZN Research Innovation and Sequencing Platform                                            | Giandhari J et al   |
| EPI_ISL_678567 | Netcare                                                                                | KRISP, KZN Research Innovation and Sequencing Platform                                            | Giandhari J et al   |
| EPI_ISL_678596 | Netcare                                                                                | KRISP, KZN Research Innovation and Sequencing Platform                                            | Giandhari J et al   |
| EPI_ISL_678571 | Netcare                                                                                | KRISP, KZN Research Innovation and Sequencing Platform                                            | Giandhari J et al   |
| EPI_ISL_678597 | Netcare                                                                                | KRISP, KZN Research Innovation and Sequencing Platform                                            | Giandhari J et al   |
| EPI_ISL_678570 | NHLS-IALCH                                                                             | KRISP, KZN Research Innovation and Sequencing Platform                                            | Giandhari J et al   |
| EPI_ISL_678625 | NHLS-IALCH                                                                             | KRISP, KZN Research Innovation and Sequencing Platform                                            | Giandhari J et al   |
| EPI_ISL_678626 | NHLS-IALCH                                                                             | KRISP, KZN Research Innovation and Sequencing Platform                                            | Giandhari J et al   |
| EPI_ISL_678627 | NHLS-IALCH                                                                             | KRISP, KZN Research Innovation and Sequencing Platform                                            | Giandhari J et al   |
| EPI_ISL_678628 | NHLS-IALCH                                                                             | KRISP, KZN Research Innovation and Sequencing Platform                                            | Giandhari J et al   |
| EPI_ISL_678629 | NHLS-IALCH                                                                             | KRISP, KZN Research Innovation and Sequencing Platform                                            | Giandhari J et al   |
| EPI_ISL_678630 | NHLS-IALCH                                                                             | KRISP, KZN Research Innovation and Sequencing Platform                                            | Giandhari J et al   |
| EPI_ISL_678631 | NHLS-IALCH                                                                             | KRISP, KZN Research Innovation and Sequencing Platform                                            | Giandhari J et al   |
| EPI_ISL_678632 | NHLS-IALCH                                                                             | KRISP, KZN Research Innovation and Sequencing Platform                                            | Giandhari J et al   |
| EPI_ISL_678633 | NHLS-IALCH                                                                             | KRISP, KZN Research Innovation and Sequencing Platform                                            | Giandhari J et al   |
| EPI_ISL_678634 | NHLS-IALCH                                                                             | KRISP, KZN Research Innovation and Sequencing Platform                                            | Giandhari J et al   |
| EPI_ISL_678635 | NHLS-IALCH                                                                             | KRISP, KZN Research Innovation and Sequencing Platform                                            | Giandhari J et al   |
| EPI_ISL_678636 | NHLS-IALCH                                                                             | KRISP, KZN Research Innovation and Sequencing Platform                                            | Giandhari J et al   |
| EPI_ISL_678638 | NHLS-IALCH                                                                             | KRISP, KZN Research Innovation and Sequencing Platform                                            | Giandhari J et al   |
| EPI_ISL_678639 | NHLS-IALCH                                                                             | KRISP, KZN Research Innovation and Sequencing Platform                                            | Giandhari J et al   |
| EPI_ISL_678640 | NHLS-IALCH                                                                             | KRISP, KZN Research Innovation and Sequencing Platform                                            | Giandhari J et al   |
| EPI_ISL_678641 | NHLS-IALCH                                                                             | KRISP, KZN Research Innovation and Sequencing Platform                                            | Giandhari J et al   |
| EPI_ISL_678642 | NHLS-IALCH                                                                             | KRISP, KZN Research Innovation and Sequencing Platform                                            | Giandhari J et al   |
| EPI_ISL_660190 | NHLS-IALCH                                                                             | KRISP, KZN Research Innovation and Sequencing Platform                                            | Giandhari J et al   |
| EPI_ISL_660629 | NHLS-IALCH                                                                             | KRISP, KZN Research Innovation and Sequencing Platform                                            | Giandhari J et al   |
| EPI_ISL_660637 | NHLS-IALCH                                                                             | KRISP, KZN Research Innovation and Sequencing Platform                                            | Giandhari J et al   |

|                |                                           |                                                        |                       |
|----------------|-------------------------------------------|--------------------------------------------------------|-----------------------|
| EPI_ISL_660646 | NHLS-IALCH                                | KRISP, KZN Research Innovation and Sequencing Platform | Giandhari J et al     |
| EPI_ISL_660659 | NHLS-IALCH                                | KRISP, KZN Research Innovation and Sequencing Platform | Giandhari J et al     |
| EPI_ISL_678643 | NHLS-IALCH                                | KRISP, KZN Research Innovation and Sequencing Platform | Giandhari J et al     |
| EPI_ISL_678604 | NHLS-IALCH                                | KRISP, KZN Research Innovation and Sequencing Platform | Giandhari J et al     |
| EPI_ISL_678615 | NHLS-IALCH                                | KRISP, KZN Research Innovation and Sequencing Platform | Giandhari J et al     |
| EPI_ISL_678618 | NHLS-IALCH                                | KRISP, KZN Research Innovation and Sequencing Platform | Giandhari J et al     |
| EPI_ISL_678621 | NHLS-IALCH                                | KRISP, KZN Research Innovation and Sequencing Platform | Giandhari J et al     |
| EPI_ISL_696460 | Kranshoek Clinic wc KSH & NHLS/UCT        | KRISP, KZN Research Innovation and Sequencing Platform | Arash Iranzadeh et al |
| EPI_ISL_696489 | New Horizon Clinic wc NZC & NHLS/UCT      | KRISP, KZN Research Innovation and Sequencing Platform | Arash Iranzadeh et al |
| EPI_ISL_696454 | Plettenberg Bay Clinic wc PLC & NHLS/UCT  | KRISP, KZN Research Innovation and Sequencing Platform | Arash Iranzadeh et al |
| EPI_ISL_696474 | Pacaltsdorp Clinic wc PAC & NHLS/UCT      | KRISP, KZN Research Innovation and Sequencing Platform | Arash Iranzadeh et al |
| EPI_ISL_696472 | Conville CDC wc CVC & NHLS/UCT            | KRISP, KZN Research Innovation and Sequencing Platform | Arash Iranzadeh et al |
| EPI_ISL_696470 | Pacaltsdorp Clinic wc PAC & NHLS/UCT      | KRISP, KZN Research Innovation and Sequencing Platform | Arash Iranzadeh et al |
| EPI_ISL_696475 | Sedgefield Clinic wc SGE & NHLS/UCT       | KRISP, KZN Research Innovation and Sequencing Platform | Arash Iranzadeh et al |
| EPI_ISL_696485 | Touwsranteen Clinic wc TST & NHLS/UCT     | KRISP, KZN Research Innovation and Sequencing Platform | Arash Iranzadeh et al |
| EPI_ISL_696466 | Great Brak River Clinic wc GBC & NHLS/UCT | KRISP, KZN Research Innovation and Sequencing Platform | Arash Iranzadeh et al |
| EPI_ISL_696461 | Thembaletu CDC wc THC & NHLS/UCT          | KRISP, KZN Research Innovation and Sequencing Platform | Arash Iranzadeh et al |
| EPI_ISL_696452 | Thembaletu CDC wc THC & NHLS/UCT          | KRISP, KZN Research Innovation and Sequencing Platform | Arash Iranzadeh et al |
| EPI_ISL_696455 | Thembaletu CDC wc THC & NHLS/UCT          | KRISP, KZN Research Innovation and Sequencing Platform | Arash Iranzadeh et al |
| EPI_ISL_696471 | George Hospital wc GRH & NHLS/UCT         | KRISP, KZN Research Innovation and Sequencing Platform | Arash Iranzadeh et al |
| EPI_ISL_696481 | George Hospital wc GRH & NHLS/UCT         | KRISP, KZN Research Innovation and Sequencing Platform | Arash Iranzadeh et al |
| EPI_ISL_696473 | George Hospital wc GRH & NHLS/UCT         | KRISP, KZN Research Innovation and Sequencing Platform | Arash Iranzadeh et al |
| EPI_ISL_696459 | Pacaltsdorp Clinic wc PAC & NHLS/UCT      | KRISP, KZN Research Innovation and Sequencing Platform | Arash Iranzadeh et al |
| EPI_ISL_696453 | Pacaltsdorp Clinic wc PAC & NHLS/UCT      | KRISP, KZN Research Innovation and Sequencing Platform | Arash Iranzadeh et al |
| EPI_ISL_696456 | Pacaltsdorp Clinic wc PAC & NHLS/UCT      | KRISP, KZN Research Innovation and Sequencing Platform | Arash Iranzadeh et al |
| EPI_ISL_696488 | Sedgefield Clinic wc SGE & NHLS/UCT       | KRISP, KZN Research Innovation and Sequencing Platform | Arash Iranzadeh et al |
| EPI_ISL_696487 | Sedgefield Clinic wc SGE & NHLS/UCT       | KRISP, KZN Research Innovation and Sequencing Platform | Arash Iranzadeh et al |
| EPI_ISL_696490 | Touwsranteen Clinic wc TST & NHLS/UCT     | KRISP, KZN Research Innovation and Sequencing Platform | Arash Iranzadeh et al |
| EPI_ISL_696458 | George Hospital wc GRH & NHLS/UCT         | KRISP, KZN Research Innovation and Sequencing Platform | Arash Iranzadeh et al |
| EPI_ISL_696469 | Knysna Hospital wc KNY & NHLS/UCT         | KRISP, KZN Research Innovation and Sequencing Platform | Arash Iranzadeh et al |
| EPI_ISL_696478 | Knysna Hospital wc KNY & NHLS/UCT         | KRISP, KZN Research Innovation and Sequencing Platform | Arash Iranzadeh et al |
| EPI_ISL_696476 | Plettenberg Bay Clinic wc PLC & NHLS/UCT  | KRISP, KZN Research Innovation and Sequencing Platform | Arash Iranzadeh et al |
| EPI_ISL_696477 | Knysna Hospital wc KNY & NHLS/UCT         | KRISP, KZN Research Innovation and Sequencing Platform | Arash Iranzadeh et al |
| EPI_ISL_696467 | Knysna CDC wc WLC & NHLS/UCT              | KRISP, KZN Research Innovation and Sequencing Platform | Arash Iranzadeh et al |
| EPI_ISL_696465 | Kwanokuthula CDC wc KWA & NHLS/UCT        | KRISP, KZN Research Innovation and Sequencing Platform | Arash Iranzadeh et al |
| EPI_ISL_696463 | Knysna Hospital wc KNY & NHLS/UCT         | KRISP, KZN Research Innovation and Sequencing Platform | Arash Iranzadeh et al |
| EPI_ISL_696491 | Knysna Hospital wc KNY & NHLS/UCT         | KRISP, KZN Research Innovation and Sequencing Platform | Arash Iranzadeh et al |
| EPI_ISL_696457 | Hornlee Clinic wc HLC & NHLS/UCT          | KRISP, KZN Research Innovation and Sequencing Platform | Arash Iranzadeh et al |
| EPI_ISL_696482 | Knysna Hospital wc KNY & NHLS/UCT         | KRISP, KZN Research Innovation and Sequencing Platform | Arash Iranzadeh et al |
| EPI_ISL_696484 | Khayelethu Clinic wc KLC & NHLS/UCT       | KRISP, KZN Research Innovation and Sequencing Platform | Arash Iranzadeh et al |
| EPI_ISL_696486 | Hornlee Clinic wc HLC & NHLS/UCT          | KRISP, KZN Research Innovation and Sequencing Platform | Arash Iranzadeh et al |
| EPI_ISL_696483 | Hornlee Clinic wc HLC & NHLS/UCT          | KRISP, KZN Research Innovation and Sequencing Platform | Arash Iranzadeh et al |
| EPI_ISL_696479 | Hornlee Clinic wc HLC & NHLS/UCT          | KRISP, KZN Research Innovation and Sequencing Platform | Arash Iranzadeh et al |

|                |                                                                                                                                       |                                                                                                                                       |                       |
|----------------|---------------------------------------------------------------------------------------------------------------------------------------|---------------------------------------------------------------------------------------------------------------------------------------|-----------------------|
| EPI_ISL_696500 | Thembaletu CDC wc THC & NHLS/UCT                                                                                                      | KRISP, KZN Research Innovation and Sequencing Platform                                                                                | Arash Iranzadeh et al |
| EPI_ISL_696499 | Thembaletu CDC wc THC & NHLS/UCT                                                                                                      | KRISP, KZN Research Innovation and Sequencing Platform                                                                                | Arash Iranzadeh et al |
| EPI_ISL_696520 | Thembaletu CDC wc THC & NHLS/UCT                                                                                                      | KRISP, KZN Research Innovation and Sequencing Platform                                                                                | Arash Iranzadeh et al |
| EPI_ISL_696521 | Thembaletu CDC wc THC & NHLS/UCT                                                                                                      | KRISP, KZN Research Innovation and Sequencing Platform                                                                                | Arash Iranzadeh et al |
| EPI_ISL_696501 | Great Brak River Clinic wc GBC & NHLS/UCT                                                                                             | KRISP, KZN Research Innovation and Sequencing Platform                                                                                | Arash Iranzadeh et al |
| EPI_ISL_696507 | Great Brak River Clinic wc GBC & NHLS/UCT                                                                                             | KRISP, KZN Research Innovation and Sequencing Platform                                                                                | Arash Iranzadeh et al |
| EPI_ISL_696512 | Conville CDC wc CVC & NHLS/UCT                                                                                                        | KRISP, KZN Research Innovation and Sequencing Platform                                                                                | Arash Iranzadeh et al |
| EPI_ISL_696497 | Great Brak River Clinic wc GBC & NHLS/UCT                                                                                             | KRISP, KZN Research Innovation and Sequencing Platform                                                                                | Arash Iranzadeh et al |
| EPI_ISL_696496 | Thembaletu CDC wc THC & NHLS/UCT                                                                                                      | KRISP, KZN Research Innovation and Sequencing Platform                                                                                | Arash Iranzadeh et al |
| EPI_ISL_696494 | Thembaletu CDC wc THC & NHLS/UCT                                                                                                      | KRISP, KZN Research Innovation and Sequencing Platform                                                                                | Arash Iranzadeh et al |
| EPI_ISL_696493 | Thembaletu CDC wc THC & NHLS/UCT                                                                                                      | KRISP, KZN Research Innovation and Sequencing Platform                                                                                | Arash Iranzadeh et al |
| EPI_ISL_696519 | Thembaletu CDC wc THC & NHLS/UCT                                                                                                      | KRISP, KZN Research Innovation and Sequencing Platform                                                                                | Arash Iranzadeh et al |
| EPI_ISL_696518 | Sedgefield Clinic wc SGE & NHLS/UCT                                                                                                   | KRISP, KZN Research Innovation and Sequencing Platform                                                                                | Arash Iranzadeh et al |
| EPI_ISL_696498 | Kranshoek Clinic wc KSH & NHLS/UCT                                                                                                    | KRISP, KZN Research Innovation and Sequencing Platform                                                                                | Arash Iranzadeh et al |
| EPI_ISL_696517 | Sedgefield Clinic wc SGE & NHLS/UCT                                                                                                   | KRISP, KZN Research Innovation and Sequencing Platform                                                                                | Arash Iranzadeh et al |
| EPI_ISL_696510 | Sedgefield Clinic wc SGE & NHLS/UCT                                                                                                   | KRISP, KZN Research Innovation and Sequencing Platform                                                                                | Arash Iranzadeh et al |
| EPI_ISL_696516 | Sedgefield Clinic wc SGE & NHLS/UCT                                                                                                   | KRISP, KZN Research Innovation and Sequencing Platform                                                                                | Arash Iranzadeh et al |
| EPI_ISL_696515 | Sedgefield Clinic wc SGE & NHLS/UCT                                                                                                   | KRISP, KZN Research Innovation and Sequencing Platform                                                                                | Arash Iranzadeh et al |
| EPI_ISL_696514 | Sedgefield Clinic wc SGE & NHLS/UCT                                                                                                   | KRISP, KZN Research Innovation and Sequencing Platform                                                                                | Arash Iranzadeh et al |
| EPI_ISL_696513 | Pacaltsdorp Clinic wc PAC & NHLS/UCT                                                                                                  | KRISP, KZN Research Innovation and Sequencing Platform                                                                                | Arash Iranzadeh et al |
| EPI_ISL_696492 | Conville CDC wc CVC & NHLS/UCT                                                                                                        | KRISP, KZN Research Innovation and Sequencing Platform                                                                                | Arash Iranzadeh et al |
| EPI_ISL_696504 | Pacaltsdorp Clinic wc PAC & NHLS/UCT                                                                                                  | KRISP, KZN Research Innovation and Sequencing Platform                                                                                | Arash Iranzadeh et al |
| EPI_ISL_696503 | George Hospital wc GRH & NHLS/UCT                                                                                                     | KRISP, KZN Research Innovation and Sequencing Platform                                                                                | Arash Iranzadeh et al |
| EPI_ISL_696506 | Knysna CDC wc WLC & NHLS/UCT                                                                                                          | KRISP, KZN Research Innovation and Sequencing Platform                                                                                | Arash Iranzadeh et al |
| EPI_ISL_696495 | Knysna CDC wc WLC & NHLS/UCT                                                                                                          | KRISP, KZN Research Innovation and Sequencing Platform                                                                                | Arash Iranzadeh et al |
| EPI_ISL_696505 | Khayeletu Clinic wc KLC & NHLS/UCT                                                                                                    | KRISP, KZN Research Innovation and Sequencing Platform                                                                                | Arash Iranzadeh et al |
| EPI_ISL_696502 | Hornlee Clinic wc HLC & NHLS/UCT                                                                                                      | KRISP, KZN Research Innovation and Sequencing Platform                                                                                | Arash Iranzadeh et al |
| EPI_ISL_622904 | National Institute for Communicable Diseases of the National Health Laboratory Service                                                | National Institute for Communicable Diseases of the National Health Laboratory Service                                                | Allam M et al         |
| EPI_ISL_407193 | Korea Centers for Disease Control & Prevention (KCDC) Center for Laboratory Control of Infectious Diseases Division of Viral Diseases | Korea Centers for Disease Control & Prevention (KCDC) Center for Laboratory Control of Infectious Diseases Division of Viral Diseases | Jeong-Min Kim et al   |
| EPI_ISL_412869 | Division of Viral Diseases, Center for Laboratory Control of Infectious Diseases, Korea Centers for Diseases Control and Prevention   | Division of Viral Diseases, Center for Laboratory Control of Infectious Diseases, Korea Centers for Diseases Control and Prevention   | Jeong-Min Kim et al   |
| EPI_ISL_412870 | Division of Viral Diseases, Center for Laboratory Control of Infectious Diseases, Korea Centers for Diseases Control and Prevention   | Division of Viral Diseases, Center for Laboratory Control of Infectious Diseases, Korea Centers for Diseases Control and Prevention   | Jeong-Min Kim et al   |
| EPI_ISL_412871 | Division of Viral Diseases, Center for Laboratory Control of Infectious Diseases, Korea Centers for Diseases Control and Prevention   | Division of Viral Diseases, Center for Laboratory Control of Infectious Diseases, Korea Centers for Diseases Control and Prevention   | Jeong-Min Kim et al   |
| EPI_ISL_412872 | Division of Viral Diseases, Center for Laboratory Control of Infectious Diseases, Korea Centers for Diseases Control and Prevention   | Division of Viral Diseases, Center for Laboratory Control of Infectious Diseases, Korea Centers for Diseases Control and Prevention   | Jeong-Min Kim et al   |
| EPI_ISL_412873 | Division of Viral Diseases, Center for Laboratory Control of Infectious Diseases, Korea Centers for Diseases Control and Prevention   | Division of Viral Diseases, Center for Laboratory Control of Infectious Diseases, Korea Centers for Diseases Control and Prevention   | Jeong-Min Kim et al   |
| EPI_ISL_413017 | Department of Microbiology, Institute for Viral Diseases, College of Medicine, Korea University                                       | Department of Microbiology, Institute for Viral Diseases, College of Medicine, Korea University                                       | Changmin Kang et al   |
| EPI_ISL_413018 | Department of Microbiology, Institute for Viral Diseases, College of Medicine, Korea University                                       | Department of Microbiology, Institute for Viral Diseases, College of Medicine, Korea University                                       | Changmin Kang et al   |

|                |                                                                                                        |                                                                                                         |                                  |
|----------------|--------------------------------------------------------------------------------------------------------|---------------------------------------------------------------------------------------------------------|----------------------------------|
| EPI_ISL_413513 | Division of Infectious Diseases, Department of Internal Medicine, Korea University College of Medicine | Department of Microbiology, Institute for Viral Diseases, College of Medicine, Korea University         | Changmin Kang et al              |
| EPI_ISL_413514 | Department of Microbiology, Institute for Viral Diseases, College of Medicine, Korea University        | Department of Microbiology, Institute for Viral Diseases, College of Medicine, Korea University         | Changmin Kang et al              |
| EPI_ISL_413515 | Division of Infectious Diseases, Department of Internal Medicine, Korea University College of Medicine | Department of Microbiology, Institute for Viral Diseases, College of Medicine, Korea University         | Changmin Kang et al              |
| EPI_ISL_413516 | Department of Microbiology, Institute for Viral Diseases, College of Medicine, Korea University        | Department of Microbiology, Institute for Viral Diseases, College of Medicine, Korea University         | Changmin Kang et al              |
| EPI_ISL_411929 | Department of Clinical Diagnostics                                                                     | Department of Clinical Diagnostics                                                                      | Park et al                       |
| EPI_ISL_414495 | Servicio Microbiología. Hospital Clínico Universitario. Valencia.                                      | Sequencing and Bioinformatics Service. Molecular Epidemiology Laboratory. FISABIO-Public Health         | David Navarro et al              |
| EPI_ISL_414496 | Servicio Microbiología. Hospital Clínico Universitario. Valencia.                                      | Sequencing and Bioinformatics Service. Molecular Epidemiology Laboratory. FISABIO-Public Health         | David Navarro et al              |
| EPI_ISL_414598 | Servicio Microbiología, Hospital Clínico Universitario, Valencia                                       | Sequencing and Bioinformatics Service and Molecular Epidemiology Research Group. FISABIO-Public Health. | David Navarro et al              |
| EPI_ISL_411951 | Unit for Laboratory Development and Technology Transfer, Public Health Agency of Sweden                | Unit for Laboratory Development and Technology Transfer, Public Health Agency of Sweden                 | Bengner et al                    |
| EPI_ISL_475556 | Halmstad klinisk mikrobiologi                                                                          | The Public Health Agency of Sweden                                                                      | Oskar Karlsson Lindsjo et al     |
| EPI_ISL_676512 | Klinsisk mikrobiologi Linköping                                                                        | The Public Health Agency of Sweden                                                                      | Department of Microbiology et al |
| EPI_ISL_594152 | Klinsisk mikrobiologi Linköping                                                                        | The Public Health Agency of Sweden                                                                      | Anna-Malin Linde et al           |
| EPI_ISL_654502 | The Public Health Agency of Sweden                                                                     | The Public Health Agency of Sweden                                                                      | Anna-Malin Linde et al           |
| EPI_ISL_676503 | Klinisk mikrobiologi                                                                                   | The Public Health Agency of Sweden                                                                      | Department of Microbiology et al |
| EPI_ISL_581987 | University Hospital Basel, Clinical Virology                                                           | University Hospital Basel, Clinical Bacteriology                                                        | Madlen Stange et al              |
| EPI_ISL_415457 | University Hospitals of Geneva Laboratory of Virology                                                  | University Hospitals of Geneva Laboratory of Virology                                                   | Laubscher F. et al               |
| EPI_ISL_413999 | Laboratoire de Virologie, HUG                                                                          | Swiss National Reference Centre for Influenza                                                           | LAUBSCHER Florian et al. et al   |
| EPI_ISL_415704 | University Hospitals of Geneva Laboratory of Virology                                                  | University Hospitals of Geneva Laboratory of Virology                                                   | Laubscher F. et al               |
| EPI_ISL_415456 | University Hospitals of Geneva Laboratory of Virology                                                  | University Hospitals of Geneva Laboratory of Virology                                                   | Laubscher F. et al               |
| EPI_ISL_414021 | Laboratoire de Virologie, HUG                                                                          | Swiss National Reference Centre for Influenza                                                           | LAUBSCHER Florian et al. et al   |
| EPI_ISL_581933 | University Hospital Basel, Clinical Virology                                                           | University Hospital Basel, Clinical Bacteriology                                                        | Madlen Stange et al              |
| EPI_ISL_581935 | University Hospital Basel, Clinical Virology                                                           | University Hospital Basel, Clinical Bacteriology                                                        | Madlen Stange et al              |
| EPI_ISL_581945 | University Hospital Basel, Clinical Virology                                                           | University Hospital Basel, Clinical Bacteriology                                                        | Madlen Stange et al              |
| EPI_ISL_581949 | University Hospital Basel, Clinical Virology                                                           | University Hospital Basel, Clinical Bacteriology                                                        | Madlen Stange et al              |
| EPI_ISL_581950 | University Hospital Basel, Clinical Virology                                                           | University Hospital Basel, Clinical Bacteriology                                                        | Madlen Stange et al              |
| EPI_ISL_581967 | University Hospital Basel, Clinical Virology                                                           | University Hospital Basel, Clinical Bacteriology                                                        | Madlen Stange et al              |
| EPI_ISL_581990 | University Hospital Basel, Clinical Virology                                                           | University Hospital Basel, Clinical Bacteriology                                                        | Madlen Stange et al              |
| EPI_ISL_581998 | University Hospital Basel, Clinical Virology                                                           | University Hospital Basel, Clinical Bacteriology                                                        | Madlen Stange et al              |
| EPI_ISL_415701 | University Hospitals of Geneva Laboratory of Virology                                                  | University Hospitals of Geneva Laboratory of Virology                                                   | Laubscher F. et al               |
| EPI_ISL_415455 | University Hospitals of Geneva Laboratory of Virology                                                  | University Hospitals of Geneva Laboratory of Virology                                                   | Laubscher F. et al               |
| EPI_ISL_415706 | University Hospitals of Geneva Laboratory of Virology                                                  | University Hospitals of Geneva Laboratory of Virology                                                   | Laubscher F. et al               |
| EPI_ISL_415700 | University Hospitals of Geneva Laboratory of Virology                                                  | University Hospitals of Geneva Laboratory of Virology                                                   | Laubscher F. et al               |
| EPI_ISL_415454 | University Hospitals of Geneva Laboratory of Virology                                                  | University Hospitals of Geneva Laboratory of Virology                                                   | Laubscher F. et al               |
| EPI_ISL_415705 | University Hospitals of Geneva Laboratory of Virology                                                  | University Hospitals of Geneva Laboratory of Virology                                                   | Laubscher F. et al               |
| EPI_ISL_415708 | University Hospitals of Geneva Laboratory of Virology                                                  | University Hospitals of Geneva Laboratory of Virology                                                   | Laubscher F. et al               |
| EPI_ISL_415707 | University Hospitals of Geneva Laboratory of Virology                                                  | University Hospitals of Geneva Laboratory of Virology                                                   | Laubscher F. et al               |
| EPI_ISL_415458 | University Hospitals of Geneva Laboratory of Virology                                                  | University Hospitals of Geneva Laboratory of Virology                                                   | Laubscher F. et al               |
| EPI_ISL_415459 | University Hospitals of Geneva Laboratory of Virology                                                  | University Hospitals of Geneva Laboratory of Virology                                                   | Laubscher F. et al               |
| EPI_ISL_413997 | Laboratoire de Virologie, HUG                                                                          | Swiss National Reference Centre for Influenza                                                           | LAUBSCHER Florian et al. et al   |

|                |                                                                        |                                                                                                                                                                                                                     |                                |
|----------------|------------------------------------------------------------------------|---------------------------------------------------------------------------------------------------------------------------------------------------------------------------------------------------------------------|--------------------------------|
| EPI_ISL_414019 | Laboratoire de Virologie, HUG                                          | Swiss National Reference Centre for Influenza                                                                                                                                                                       | LAUBSCHER Florian et al. et al |
| EPI_ISL_414020 | Laboratoire de Virologie, HUG                                          | Swiss National Reference Centre for Influenza                                                                                                                                                                       | LAUBSCHER Florian et al. et al |
| EPI_ISL_414022 | Laboratoire de Virologie, HUG                                          | Swiss National Reference Centre for Influenza                                                                                                                                                                       | LAUBSCHER Florian et al. et al |
| EPI_ISL_415698 | University Hospitals of Geneva Laboratory of Virology                  | University Hospitals of Geneva Laboratory of Virology                                                                                                                                                               | Laubscher F. et al             |
| EPI_ISL_415699 | University Hospitals of Geneva Laboratory of Virology                  | University Hospitals of Geneva Laboratory of Virology                                                                                                                                                               | Laubscher F. et al             |
| EPI_ISL_415702 | University Hospitals of Geneva Laboratory of Virology                  | University Hospitals of Geneva Laboratory of Virology                                                                                                                                                               | Laubscher F. et al             |
| EPI_ISL_415703 | University Hospitals of Geneva Laboratory of Virology                  | University Hospitals of Geneva Laboratory of Virology                                                                                                                                                               | Laubscher F. et al             |
| EPI_ISL_413996 | Laboratoire de Virologie, HUG                                          | Swiss National Reference Centre for Influenza                                                                                                                                                                       | LAUBSCHER Florian et al. et al |
| EPI_ISL_414023 | Laboratoire de Virologie, HUG                                          | Swiss National Reference Centre for Influenza                                                                                                                                                                       | LAUBSCHER Florian et al. et al |
| EPI_ISL_413019 | Department of Internal Medicine, Triemli Hospital                      | Institute of Medical Virology, University of Zurich                                                                                                                                                                 | Stefan Schmutz et al           |
| EPI_ISL_413020 | Department of Internal Medicine, Triemli Hospital                      | Institute of Medical Virology, University of Zurich                                                                                                                                                                 | Stefan Schmutz et al           |
| EPI_ISL_413021 | Klinik Hirslanden Zurich                                               | Institute of Medical Virology, University of Zurich                                                                                                                                                                 | Stefan Schmutz et al           |
| EPI_ISL_413022 | Division of Infectious Diseases, University Hospital Zurich            | Institute of Medical Virology, University of Zurich                                                                                                                                                                 | Stefan Schmutz et al           |
| EPI_ISL_413023 | Division of Infectious Diseases, University Hospital Zurich            | Institute of Medical Virology, University of Zurich                                                                                                                                                                 | Stefan Schmutz et al           |
| EPI_ISL_413024 | Division of Infectious Diseases, University Hospital Zurich            | Institute of Medical Virology, University of Zurich                                                                                                                                                                 | Stefan Schmutz et al           |
| EPI_ISL_406031 | Centers for Disease Control, R.O.C. (Taiwan)                           | Centers for Disease Control, R.O.C. (Taiwan)                                                                                                                                                                        | Ji-Rong Yang et al             |
| EPI_ISL_411926 | Taiwan Centers for Disease Control                                     | Taiwan Centers for Disease Control                                                                                                                                                                                  | Ji-Rong Yang et al             |
| EPI_ISL_411927 | Taiwan Centers for Disease Control                                     | Taiwan Centers for Disease Control                                                                                                                                                                                  | Ji-Rong Yang et al             |
| EPI_ISL_411915 | Laboratory Medicine                                                    | Department of Laboratory Medicine, Lin-Kou Chang Gung Memorial Hospital, Taoyuan, Taiwan.                                                                                                                           | Kuo-Chien Tsao et al           |
| EPI_ISL_415741 | Laboratory Medicine                                                    | Department of Laboratory Medicine, Lin-Kou Chang Gung Memorial Hospital, Taoyuan, Taiwan                                                                                                                            | Kuo-Chien Tsao et al           |
| EPI_ISL_415742 | Laboratory Medicine                                                    | Department of Laboratory Medicine, Lin-Kou Chang Gung Memorial Hospital, Taoyuan, Taiwan                                                                                                                            | Kuo-Chien Tsao et al           |
| EPI_ISL_415743 | Laboratory Medicine                                                    | Department of Laboratory Medicine, Lin-Kou Chang Gung Memorial Hospital, Taoyuan, Taiwan                                                                                                                            | Kuo-Chien Tsao et al           |
| EPI_ISL_444275 | Laboratory Medicine                                                    | Department of Laboratory Medicine, Lin-Kou Chang Gung Memorial Hospital, Taoyuan, Taiwan                                                                                                                            | Kuo-Chien Tsao et al           |
| EPI_ISL_408489 | Department of Laboratory Medicine, National Taiwan University Hospital | Microbial Genomics Core Lab, National Taiwan University Centers of Genomic and Precision Medicine                                                                                                                   | Shiou-Hwei Yeh et al           |
| EPI_ISL_410218 | Department of Laboratory Medicine, National Taiwan University Hospital | Microbial Genomics Core Lab, National Taiwan University Centers of Genomic and Precision Medicine                                                                                                                   | Shiou-Hwei Yeh et al           |
| EPI_ISL_413592 | Department of Laboratory Medicine, National Taiwan University Hospital | Microbial Genomics Core Lab, National Taiwan University Centers of Genomic and Precision Medicine                                                                                                                   | Shiou-Hwei Yeh et al           |
| EPI_ISL_403962 | Bamrasnaradura Hospital                                                | 1. Department of Medical Sciences, Ministry of Public Health, Thailand 2. Thai Red Cross Emerging Infectious Diseases - Health Science Centre 3. Department of Disease Control, Ministry of Public Health, Thailand | Pilailuk et al                 |
| EPI_ISL_403963 | Bamrasnaradura Hospital                                                | 1. Department of Medical Sciences, Ministry of Public Health, Thailand 2. Thai Red Cross Emerging Infectious Diseases - Health Science Centre 3. Department of Disease Control, Ministry of Public Health, Thailand | Pilailuk et al                 |
| EPI_ISL_434692 | Bamrasnaradura hospital                                                | National Institute of Health. Department of medical Sciences, Ministry of Public Health, Thailand                                                                                                                   | Pilailuk et al                 |
| EPI_ISL_412983 | Tianmen Center for Disease Control and Prevention                      | Hubei Provincial Center for Disease Control and Prevention                                                                                                                                                          | Bin Fang et al                 |
| EPI_ISL_500716 | BSL3 Lab Pendik Veterinary Control Institute                           | Department of Medicinal Genetics, Bursa Uludağ University, Faculty of medicine By Sehime Gülsün Temel, Adem Alemdar, Kadir Yeşilbağ                                                                                 | Mustafa HASOKSUZ et al         |
| EPI_ISL_491476 | BSL3 Lab, Pendik Veterinary Control Enstitue                           | Genomic Laboratory (GLAB), Istanbul Technical University                                                                                                                                                            | Mustafa HASOKSUZ et al         |
| EPI_ISL_406223 | Arizona Department of Health Services                                  | Pathogen Discovery, Respiratory Viruses Branch, Division of Viral Diseases, Centers for Disease Control and Prevention                                                                                              | Ying Tao et al                 |
| EPI_ISL_406034 | California Department of Public Health                                 | Pathogen Discovery, Respiratory Viruses Branch, Division of Viral Diseases, Centers for Disease Control and Prevention                                                                                              | Anna Uehara et al              |
| EPI_ISL_408008 | California Department of Health                                        | Pathogen Discovery, Respiratory Viruses Branch, Division of Viral Diseases, Centers for Disease Control and Prevention                                                                                              | Krista Queen et al             |

|                |                                               |                                                                                                                        |                        |
|----------------|-----------------------------------------------|------------------------------------------------------------------------------------------------------------------------|------------------------|
| EPI_ISL_408009 | California Department of Health               | Pathogen Discovery, Respiratory Viruses Branch, Division of Viral Diseases, Centers for Disease Control and Prevention | Krista Queen et al     |
| EPI_ISL_408010 | California Department of Health               | Pathogen Discovery, Respiratory Viruses Branch, Division of Viral Diseases, Centers for Disease Control and Prevention | Ying Tao et al         |
| EPI_ISL_410044 | California Department of Public Health        | Pathogen Discovery, Respiratory Viruses Branch, Division of Viral Diseases, Centers for Disease Control and Prevention | Jing Zhang et al       |
| EPI_ISL_411954 | California Department of Public Health        | Pathogen Discovery, Respiratory Viruses Branch, Division of Viral Diseases, Centers for Disease Control and Prevention | Krista Queen et al     |
| EPI_ISL_411955 | California Department of Public Health        | Pathogen Discovery, Respiratory Viruses Branch, Division of Viral Diseases, Centers for Disease Control and Prevention | Krista Queen et al     |
| EPI_ISL_412862 | California Department of Public Health        | Pathogen Discovery, Respiratory Viruses Branch, Division of Viral Diseases, Centers for Disease Control and Prevention | Krista Queen et al     |
| EPI_ISL_413557 | California Department of Public Health        | Chiu Laboratory, University of California, San Francisco                                                               | Xianding Deng et al    |
| EPI_ISL_413931 | California Department of Public Health        | Chiu Laboratory, University of California, San Francisco                                                               | Xianding Deng et al    |
| EPI_ISL_413558 | California Department of Public Health        | Chiu Laboratory, University of California, San Francisco                                                               | Xianding Deng et al    |
| EPI_ISL_413559 | California Department of Public Health        | Chiu Laboratory, University of California, San Francisco                                                               | Xianding Deng et al    |
| EPI_ISL_413561 | California Department of Public Health        | Chiu Laboratory, University of California, San Francisco                                                               | Xianding Deng et al    |
| EPI_ISL_413922 | California Department of Public Health        | Chiu Laboratory, University of California, San Francisco                                                               | Xianding Deng et al    |
| EPI_ISL_413924 | California Department of Public Health        | Chiu Laboratory, University of California, San Francisco                                                               | Xianding Deng et al    |
| EPI_ISL_413925 | California Department of Public Health        | Chiu Laboratory, University of California, San Francisco                                                               | Xianding Deng et al    |
| EPI_ISL_413926 | California Department of Public Health        | Chiu Laboratory, University of California, San Francisco                                                               | Xianding Deng et al    |
| EPI_ISL_413928 | California Department of Public Health        | Chiu Laboratory, University of California, San Francisco                                                               | Xianding Deng et al    |
| EPI_ISL_414648 | Andersen Lab, The Scripps Research Institute  | Andersen Lab, The Scripps Research Institute                                                                           | Mark Zeller et al      |
| EPI_ISL_406036 | California Department of Public Health        | Pathogen Discovery, Respiratory Viruses Branch, Division of Viral Diseases, Centers for Disease Control and Prevention | Anna Uehara et al      |
| EPI_ISL_416417 | Connecticut State Department of Public Health | Grubaugh Lab - Yale School of Public Health                                                                            | Joseph Fauver et al    |
| EPI_ISL_416420 | Yale Clinical Virology Laboratory             | Grubaugh Lab - Yale School of Public Health                                                                            | Joseph Fauver et al    |
| EPI_ISL_416421 | Yale Clinical Virology Laboratory             | Grubaugh Lab - Yale School of Public Health                                                                            | Joseph Fauver et al    |
| EPI_ISL_416423 | Yale Clinical Virology Laboratory             | Grubaugh Lab - Yale School of Public Health                                                                            | Joseph Fauver et al    |
| EPI_ISL_413606 | unknown                                       | Pathogen Discovery, Respiratory Viruses Branch, Division of Viral Diseases, Centers for Disease Control and Prevention | Anna Uehara et al      |
| EPI_ISL_413615 | unknown                                       | Pathogen Discovery, Respiratory Viruses Branch, Division of Viral Diseases, Centers for Disease Control and Prevention | Ying Tao et al         |
| EPI_ISL_413616 | unknown                                       | Pathogen Discovery, Respiratory Viruses Branch, Division of Viral Diseases, Centers for Disease Control and Prevention | Ying Tao et al         |
| EPI_ISL_413617 | unknown                                       | Pathogen Discovery, Respiratory Viruses Branch, Division of Viral Diseases, Centers for Disease Control and Prevention | Ying Tao et al         |
| EPI_ISL_413618 | unknown                                       | Pathogen Discovery, Respiratory Viruses Branch, Division of Viral Diseases, Centers for Disease Control and Prevention | Clinton R. Paden et al |
| EPI_ISL_413619 | unknown                                       | Pathogen Discovery, Respiratory Viruses Branch, Division of Viral Diseases, Centers for Disease Control and Prevention | Clinton R. Paden et al |
| EPI_ISL_413620 | unknown                                       | Pathogen Discovery, Respiratory Viruses Branch, Division of Viral Diseases, Centers for Disease Control and Prevention | Clinton R. Paden et al |
| EPI_ISL_413621 | unknown                                       | Pathogen Discovery, Respiratory Viruses Branch, Division of Viral Diseases, Centers for Disease Control and Prevention | Clinton R. Paden et al |
| EPI_ISL_413622 | unknown                                       | Pathogen Discovery, Respiratory Viruses Branch, Division of Viral Diseases, Centers for Disease Control and Prevention | Clinton R. Paden et al |
| EPI_ISL_413623 | unknown                                       | Pathogen Discovery, Respiratory Viruses Branch, Division of Viral Diseases, Centers for Disease Control and Prevention | Clinton R. Paden et al |
| EPI_ISL_414479 | unknown                                       | Pathogen Discovery, Respiratory Viruses Branch, Division of Viral Diseases, Centers for Disease Control and Prevention | Ying Tao et al         |
| EPI_ISL_413607 | unknown                                       | Pathogen Discovery, Respiratory Viruses Branch, Division of Viral Diseases, Centers for Disease Control and Prevention | Anna Uehara et al      |
| EPI_ISL_414480 | unknown                                       | Pathogen Discovery, Respiratory Viruses Branch, Division of Viral Diseases, Centers for Disease Control and Prevention | Ying Tao et al         |

|                |                                                          |                                                                                                                        |                              |
|----------------|----------------------------------------------------------|------------------------------------------------------------------------------------------------------------------------|------------------------------|
| EPI_ISL_414481 | unknown                                                  | Pathogen Discovery, Respiratory Viruses Branch, Division of Viral Diseases, Centers for Disease Control and Prevention | Ying Tao et al               |
| EPI_ISL_414482 | unknown                                                  | Pathogen Discovery, Respiratory Viruses Branch, Division of Viral Diseases, Centers for Disease Control and Prevention | Krista Queen et al           |
| EPI_ISL_414483 | unknown                                                  | Pathogen Discovery, Respiratory Viruses Branch, Division of Viral Diseases, Centers for Disease Control and Prevention | Krista Queen et al           |
| EPI_ISL_414484 | unknown                                                  | Pathogen Discovery, Respiratory Viruses Branch, Division of Viral Diseases, Centers for Disease Control and Prevention | Krista Queen et al           |
| EPI_ISL_414485 | unknown                                                  | Pathogen Discovery, Respiratory Viruses Branch, Division of Viral Diseases, Centers for Disease Control and Prevention | Krista Queen et al           |
| EPI_ISL_413608 | unknown                                                  | Pathogen Discovery, Respiratory Viruses Branch, Division of Viral Diseases, Centers for Disease Control and Prevention | Anna Uehara et al            |
| EPI_ISL_413609 | unknown                                                  | Pathogen Discovery, Respiratory Viruses Branch, Division of Viral Diseases, Centers for Disease Control and Prevention | Anna Uehara et al            |
| EPI_ISL_413610 | unknown                                                  | Pathogen Discovery, Respiratory Viruses Branch, Division of Viral Diseases, Centers for Disease Control and Prevention | Anna Uehara et al            |
| EPI_ISL_413611 | unknown                                                  | Pathogen Discovery, Respiratory Viruses Branch, Division of Viral Diseases, Centers for Disease Control and Prevention | Anna Uehara et al            |
| EPI_ISL_413612 | unknown                                                  | Pathogen Discovery, Respiratory Viruses Branch, Division of Viral Diseases, Centers for Disease Control and Prevention | Ying Tao et al               |
| EPI_ISL_413613 | unknown                                                  | Pathogen Discovery, Respiratory Viruses Branch, Division of Viral Diseases, Centers for Disease Control and Prevention | Ying Tao et al               |
| EPI_ISL_413614 | unknown                                                  | Pathogen Discovery, Respiratory Viruses Branch, Division of Viral Diseases, Centers for Disease Control and Prevention | Ying Tao et al               |
| EPI_ISL_547774 | Gundersen Molecular Diagnostics Laboratory               | Kabara Cancer Research Institute                                                                                       | Craig S. Richmond et al      |
| EPI_ISL_626452 | Northwestern Memorial Hospital                           | Ozer Lab                                                                                                               | Ramon Lorenzo-Redondo et al  |
| EPI_ISL_404253 | IL Department of Public Health Chicago Laboratory        | Pathogen Discovery, Respiratory Viruses Branch, Division of Viral Diseases, Centers for Disease Control and Prevention | Ying Tao et al               |
| EPI_ISL_410045 | IL Department of Public Health Chicago Laboratory        | Pathogen Discovery, Respiratory Viruses Branch, Division of Viral Diseases, Centers for Disease Control and Prevention | Yan Li et al                 |
| EPI_ISL_593554 | Brigham and Women's Hospital                             | Jonathan Li Laboratory                                                                                                 | Manish C. Choudhary et al    |
| EPI_ISL_593555 | Brigham and Women's Hospital                             | Jonathan Li Laboratory                                                                                                 | Manish C. Choudhary et al    |
| EPI_ISL_593556 | Brigham and Women's Hospital                             | Jonathan Li Laboratory                                                                                                 | Manish C. Choudhary et al    |
| EPI_ISL_593557 | Brigham and Women's Hospital                             | Jonathan Li Laboratory                                                                                                 | Manish C. Choudhary et al    |
| EPI_ISL_593558 | Brigham and Women's Hospital                             | Jonathan Li Laboratory                                                                                                 | Manish C. Choudhary et al    |
| EPI_ISL_692846 | Massachusetts State Public Health Laboratory             | Massachusetts State Public Health Laboratory                                                                           | Andrew Lang et al            |
| EPI_ISL_409067 | Massachusetts Department of Public Health                | Pathogen Discovery, Respiratory Viruses Branch, Division of Viral Diseases, Centers for Disease Control and Prevention | Clinton R. Paden et al       |
| EPI_ISL_682133 | University of Michigan Clinical Microbiology Laboratory  | Lauring Lab, University of Michigan, Department of Microbiology and Immunology                                         | Valesano et al               |
| EPI_ISL_414588 | Minnesota Department of Health, Public Health Laboratory | Minnesota Department of Health, Public Health Laboratory                                                               | Matt Plumb et al             |
| EPI_ISL_414589 | Minnesota Department of Health, Public Health Laboratory | Minnesota Department of Health, Public Health Laboratory                                                               | Matt Plumb et al             |
| EPI_ISL_414590 | Minnesota Department of Health, Public Health Laboratory | Minnesota Department of Health, Public Health Laboratory                                                               | Matt Plumb et al             |
| EPI_ISL_683766 | DOHMH Corona                                             | New York City Public Health Laboratory                                                                                 | Jade Wang et al              |
| EPI_ISL_456109 | NYU Langone Health                                       | Departments of Pathology and Medicine, New York University School of Medicine                                          | Maria Aguero-Rosenfeld et al |
| EPI_ISL_414476 | MSSH Clinical Microbiology Laboratories                  | MSSH Pathogen Surveillance Program                                                                                     | Gopi Patel et al             |
| EPI_ISL_415151 | MSSH Clinical Microbiology Laboratories                  | MSSH Pathogen Surveillance Program                                                                                     | Gopi Patel et al             |
| EPI_ISL_526015 | OHSU Lab Services Molecular Microbiology Lab             | Oregon SARS-CoV-2 Genome Sequencing Center                                                                             | Brendan L. O'Connell et al   |
| EPI_ISL_411956 | Texas Department of State Health Services                | Pathogen Discovery, Respiratory Viruses Branch, Division of Viral Diseases, Centers for Disease Control and Prevention | Krista Queen et al           |
| EPI_ISL_415539 | Utah Public Health Laboratory                            | Utah Public Health Laboratory                                                                                          | Erin Young et al             |
| EPI_ISL_415541 | Utah Public Health Laboratory                            | Utah Public Health Laboratory                                                                                          | Erin Young et al             |
| EPI_ISL_415542 | Utah Public Health Laboratory                            | Utah Public Health Laboratory                                                                                          | Erin Young et al             |

|                |                                                            |                                                            |                            |
|----------------|------------------------------------------------------------|------------------------------------------------------------|----------------------------|
| EPI_ISL_415543 | Utah Public Health Laboratory                              | Utah Public Health Laboratory                              | Erin Young et al           |
| EPI_ISL_415544 | Utah Public Health Laboratory                              | Utah Public Health Laboratory                              | Erin Young et al           |
| EPI_ISL_413456 | Seattle Flu Study, University of Washington Medical Center | Seattle Flu Study, University of Washington Medical Center | Chu et al et al            |
| EPI_ISL_413560 | Seattle Flu Study                                          | Seattle Flu Study                                          | Chu et al et al            |
| EPI_ISL_570847 | UW Virology Lab                                            | UW Virology Lab                                            | Pavitra Roychoudhury et al |
| EPI_ISL_414363 | UW Virology Lab                                            | UW Virology Lab                                            | Pavitra Roychoudhury et al |
| EPI_ISL_414364 | UW Virology Lab                                            | UW Virology Lab                                            | Pavitra Roychoudhury et al |
| EPI_ISL_414365 | UW Virology Lab                                            | UW Virology Lab                                            | Pavitra Roychoudhury et al |
| EPI_ISL_414366 | UW Virology Lab                                            | UW Virology Lab                                            | Pavitra Roychoudhury et al |
| EPI_ISL_414367 | UW Virology Lab                                            | UW Virology Lab                                            | Pavitra Roychoudhury et al |
| EPI_ISL_414368 | UW Virology Lab                                            | UW Virology Lab                                            | Pavitra Roychoudhury et al |
| EPI_ISL_414369 | UW Virology Lab                                            | UW Virology Lab                                            | Pavitra Roychoudhury et al |
| EPI_ISL_414591 | UW Virology Lab                                            | UW Virology Lab                                            | Pavitra Roychoudhury et al |
| EPI_ISL_414592 | UW Virology Lab                                            | UW Virology Lab                                            | Pavitra Roychoudhury et al |
| EPI_ISL_414593 | UW Virology Lab                                            | UW Virology Lab                                            | Pavitra Roychoudhury et al |
| EPI_ISL_414594 | UW Virology Lab                                            | UW Virology Lab                                            | Pavitra Roychoudhury et al |
| EPI_ISL_414595 | UW Virology Lab                                            | UW Virology Lab                                            | Pavitra Roychoudhury et al |
| EPI_ISL_414596 | UW Virology Lab                                            | UW Virology Lab                                            | Pavitra Roychoudhury et al |
| EPI_ISL_414597 | UW Virology Lab                                            | UW Virology Lab                                            | Pavitra Roychoudhury et al |
| EPI_ISL_414616 | UW Virology Lab                                            | UW Virology Lab                                            | Pavitra Roychoudhury et al |
| EPI_ISL_414617 | UW Virology Lab                                            | UW Virology Lab                                            | Pavitra Roychoudhury et al |
| EPI_ISL_414618 | UW Virology Lab                                            | UW Virology Lab                                            | Pavitra Roychoudhury et al |
| EPI_ISL_414619 | UW Virology Lab                                            | UW Virology Lab                                            | Pavitra Roychoudhury et al |
| EPI_ISL_414620 | UW Virology Lab                                            | UW Virology Lab                                            | Pavitra Roychoudhury et al |
| EPI_ISL_414621 | UW Virology Lab                                            | UW Virology Lab                                            | Pavitra Roychoudhury et al |
| EPI_ISL_414622 | UW Virology Lab                                            | UW Virology Lab                                            | Pavitra Roychoudhury et al |
| EPI_ISL_415605 | UW Virology Lab                                            | UW Virology Lab                                            | Pavitra Roychoudhury et al |
| EPI_ISL_415606 | UW Virology Lab                                            | UW Virology Lab                                            | Pavitra Roychoudhury et al |
| EPI_ISL_415607 | UW Virology Lab                                            | UW Virology Lab                                            | Pavitra Roychoudhury et al |
| EPI_ISL_415608 | UW Virology Lab                                            | UW Virology Lab                                            | Pavitra Roychoudhury et al |
| EPI_ISL_415609 | UW Virology Lab                                            | UW Virology Lab                                            | Pavitra Roychoudhury et al |
| EPI_ISL_415610 | UW Virology Lab                                            | UW Virology Lab                                            | Pavitra Roychoudhury et al |
| EPI_ISL_415611 | UW Virology Lab                                            | UW Virology Lab                                            | Pavitra Roychoudhury et al |
| EPI_ISL_415612 | UW Virology Lab                                            | UW Virology Lab                                            | Pavitra Roychoudhury et al |
| EPI_ISL_415613 | UW Virology Lab                                            | UW Virology Lab                                            | Pavitra Roychoudhury et al |
| EPI_ISL_415614 | UW Virology Lab                                            | UW Virology Lab                                            | Pavitra Roychoudhury et al |
| EPI_ISL_415615 | UW Virology Lab                                            | UW Virology Lab                                            | Pavitra Roychoudhury et al |
| EPI_ISL_415616 | UW Virology Lab                                            | UW Virology Lab                                            | Pavitra Roychoudhury et al |
| EPI_ISL_415617 | UW Virology Lab                                            | UW Virology Lab                                            | Pavitra Roychoudhury et al |
| EPI_ISL_415619 | UW Virology Lab                                            | UW Virology Lab                                            | Pavitra Roychoudhury et al |
| EPI_ISL_415620 | UW Virology Lab                                            | UW Virology Lab                                            | Pavitra Roychoudhury et al |
| EPI_ISL_415621 | UW Virology Lab                                            | UW Virology Lab                                            | Pavitra Roychoudhury et al |
| EPI_ISL_415622 | UW Virology Lab                                            | UW Virology Lab                                            | Pavitra Roychoudhury et al |



|                |                                                                                  |                                                                                                                        |                            |
|----------------|----------------------------------------------------------------------------------|------------------------------------------------------------------------------------------------------------------------|----------------------------|
| EPI_ISL_415623 | UW Virology Lab                                                                  | UW Virology Lab                                                                                                        | Pavitra Roychoudhury et al |
| EPI_ISL_415624 | UW Virology Lab                                                                  | UW Virology Lab                                                                                                        | Pavitra Roychoudhury et al |
| EPI_ISL_415625 | UW Virology Lab                                                                  | UW Virology Lab                                                                                                        | Pavitra Roychoudhury et al |
| EPI_ISL_415626 | UW Virology Lab                                                                  | UW Virology Lab                                                                                                        | Pavitra Roychoudhury et al |
| EPI_ISL_415627 | UW Virology Lab                                                                  | UW Virology Lab                                                                                                        | Pavitra Roychoudhury et al |
| EPI_ISL_415591 | UW Virology Lab                                                                  | UW Virology Lab                                                                                                        | Pavitra Roychoudhury et al |
| EPI_ISL_415592 | UW Virology Lab                                                                  | UW Virology Lab                                                                                                        | Pavitra Roychoudhury et al |
| EPI_ISL_415594 | UW Virology Lab                                                                  | UW Virology Lab                                                                                                        | Pavitra Roychoudhury et al |
| EPI_ISL_415595 | UW Virology Lab                                                                  | UW Virology Lab                                                                                                        | Pavitra Roychoudhury et al |
| EPI_ISL_415596 | UW Virology Lab                                                                  | UW Virology Lab                                                                                                        | Pavitra Roychoudhury et al |
| EPI_ISL_415597 | UW Virology Lab                                                                  | UW Virology Lab                                                                                                        | Pavitra Roychoudhury et al |
| EPI_ISL_415598 | UW Virology Lab                                                                  | UW Virology Lab                                                                                                        | Pavitra Roychoudhury et al |
| EPI_ISL_415599 | UW Virology Lab                                                                  | UW Virology Lab                                                                                                        | Pavitra Roychoudhury et al |
| EPI_ISL_415600 | UW Virology Lab                                                                  | UW Virology Lab                                                                                                        | Pavitra Roychoudhury et al |
| EPI_ISL_415601 | UW Virology Lab                                                                  | UW Virology Lab                                                                                                        | Pavitra Roychoudhury et al |
| EPI_ISL_415602 | UW Virology Lab                                                                  | UW Virology Lab                                                                                                        | Pavitra Roychoudhury et al |
| EPI_ISL_415603 | UW Virology Lab                                                                  | UW Virology Lab                                                                                                        | Pavitra Roychoudhury et al |
| EPI_ISL_415604 | UW Virology Lab                                                                  | UW Virology Lab                                                                                                        | Pavitra Roychoudhury et al |
| EPI_ISL_404895 | Providence Regional Medical Center                                               | Division of Viral Diseases, Centers for Disease Control and Prevention                                                 | Queen et al                |
| EPI_ISL_413562 | UW Virology Lab                                                                  | UW Virology Lab                                                                                                        | Pavitra Roychoudhury et al |
| EPI_ISL_413563 | UW Virology Lab                                                                  | UW Virology Lab                                                                                                        | Pavitra Roychoudhury et al |
| EPI_ISL_413601 | UW Virology Lab                                                                  | UW Virology Lab                                                                                                        | Pavitra Roychoudhury et al |
| EPI_ISL_413649 | UW Virology Lab                                                                  | UW Virology Lab                                                                                                        | Pavitra Roychoudhury et al |
| EPI_ISL_413650 | UW Virology Lab                                                                  | UW Virology Lab                                                                                                        | Pavitra Roychoudhury et al |
| EPI_ISL_413651 | UW Virology Lab                                                                  | UW Virology Lab                                                                                                        | Pavitra Roychoudhury et al |
| EPI_ISL_413652 | UW Virology Lab                                                                  | UW Virology Lab                                                                                                        | Pavitra Roychoudhury et al |
| EPI_ISL_413653 | UW Virology Lab                                                                  | UW Virology Lab                                                                                                        | Pavitra Roychoudhury et al |
| EPI_ISL_412970 | Washington State Department of Health                                            | Seattle Flu Study                                                                                                      | Helen Chu et al            |
| EPI_ISL_413025 | Harborview Medical Center                                                        | UW Virology Lab                                                                                                        | Pavitra Roychoudhury et al |
| EPI_ISL_413455 | Washington State Public Health Lab                                               | University of Washington Virology Lab                                                                                  | Pavitra Roychoudhury et al |
| EPI_ISL_413457 | Washington State Public Health Lab                                               | UW Virology Lab                                                                                                        | Pavitra Roychoudhury et al |
| EPI_ISL_413458 | Washington State Public Health Lab                                               | UW Virology Lab                                                                                                        | Pavitra Roychoudhury et al |
| EPI_ISL_413486 | Valley Medical Center                                                            | University of Washington Virology Lab                                                                                  | Pavitra Roychoudhury et al |
| EPI_ISL_413487 | Harborview Medical Center                                                        | University of Washington Virology Lab                                                                                  | Pavitra Roychoudhury et al |
| EPI_ISL_408670 | Wisconsin Department of Health Services                                          | Pathogen Discovery, Respiratory Viruses Branch, Division of Viral Diseases, Centers for Disease Control and Prevention | Jing Zhang et al           |
| EPI_ISL_416427 | National Influenza Center, National Institute of Hygiene and Epidemiology (NIHE) | National Influenza Center, National Institute of Hygiene and Epidemiology (NIHE)                                       | Le Quynh Mai et al         |
| EPI_ISL_416428 | National Influenza Center, National Institute of Hygiene and Epidemiology (NIHE) | National Influenza Center, National Institute of Hygiene and Epidemiology (NIHE)                                       | Le Quynh Mai et al         |
| EPI_ISL_416430 | National Influenza Center, National Institute of Hygiene and Epidemiology (NIHE) | National Influenza Center, National Institute of Hygiene and Epidemiology (NIHE)                                       | Le Quynh Mai et al         |
| EPI_ISL_416431 | National Influenza Center, National Institute of Hygiene and Epidemiology (NIHE) | National Influenza Center, National Institute of Hygiene and Epidemiology (NIHE)                                       | Le Quynh Mai et al         |
| EPI_ISL_416429 | National Influenza Center, National Institute of Hygiene and Epidemiology (NIHE) | National Influenza Center, National Institute of Hygiene and Epidemiology (NIHE)                                       | Le Quynh Mai et al         |

|                |                                                                                                                                                                                                 |                                                                                   |                                           |
|----------------|-------------------------------------------------------------------------------------------------------------------------------------------------------------------------------------------------|-----------------------------------------------------------------------------------|-------------------------------------------|
| EPI_ISL_408668 | National Influenza Center - National Institute of Hygiene and Epidemiology (NIHE)                                                                                                               | National Influenza Center - National Institute of Hygiene and Epidemiology (NIHE) | Ung Thi Hong Trang et al                  |
| EPI_ISL_625434 | Lighthouse Lab in Alderley Park                                                                                                                                                                 | Wellcome Sanger Institute for the COVID-19 Genomics UK (COG-UK) consortium        | Jacquelyn Wynn et al                      |
| EPI_ISL_634772 | Lighthouse Lab in Alderley Park                                                                                                                                                                 | Wellcome Sanger Institute for the COVID-19 Genomics UK (COG-UK) consortium        | Jacquelyn Wynn et al                      |
| EPI_ISL_634783 | Lighthouse Lab in Alderley Park                                                                                                                                                                 | Wellcome Sanger Institute for the COVID-19 Genomics UK (COG-UK) consortium        | Jacquelyn Wynn et al                      |
| EPI_ISL_624489 | Lighthouse Lab in Alderley Park                                                                                                                                                                 | Wellcome Sanger Institute for the COVID-19 Genomics UK (COG-UK) consortium        | Jacquelyn Wynn et al                      |
| EPI_ISL_665338 | Centre for Enzyme Innovation, University of Portsmouth / Translational Research Laboratory, Portsmouth Hospitals NHS Trust                                                                      | COVID-19 Genomics UK (COG-UK) Consortium                                          | Angela Beckett et al                      |
| EPI_ISL_585626 | Virology Department, Sheffield Teaching Hospitals NHS Foundation Trust/Department of Infection, Immunity and Cardiovascular Disease, The Medical School, University of Sheffield                | COVID-19 Genomics UK (COG-UK) Consortium                                          | Thushan de Silva et al                    |
| EPI_ISL_585628 | Queens Medical Centre, Clinical Microbiology Department / DeepSeq Nottingham                                                                                                                    | COVID-19 Genomics UK (COG-UK) Consortium                                          | Gemma Clark et al                         |
| EPI_ISL_585629 | Queens Medical Centre, Clinical Microbiology Department / DeepSeq Nottingham                                                                                                                    | COVID-19 Genomics UK (COG-UK) Consortium                                          | Gemma Clark et al                         |
| EPI_ISL_625439 | Lighthouse Lab in Cambridge                                                                                                                                                                     | Wellcome Sanger Institute for the COVID-19 Genomics UK (COG-UK) consortium        | Rob Howes et al                           |
| EPI_ISL_609176 | Lighthouse Lab in Cambridge                                                                                                                                                                     | Wellcome Sanger Institute for the COVID-19 Genomics UK (COG-UK) consortium        | Rob Howes et al                           |
| EPI_ISL_634802 | Lighthouse Lab in Cambridge                                                                                                                                                                     | Wellcome Sanger Institute for the COVID-19 Genomics UK (COG-UK) consortium        | Rob Howes et al                           |
| EPI_ISL_634809 | Lighthouse Lab in Cambridge                                                                                                                                                                     | Wellcome Sanger Institute for the COVID-19 Genomics UK (COG-UK) consortium        | Rob Howes et al                           |
| EPI_ISL_627208 | West of Scotland Specialist Virology Centre, NHSGCG / MRC-University of Glasgow Centre for Virus Research                                                                                       | COVID-19 Genomics UK (COG-UK) Consortium                                          | Ana da Silva Filipe et al                 |
| EPI_ISL_626843 | West of Scotland Specialist Virology Centre, NHSGCG / MRC-University of Glasgow Centre for Virus Research                                                                                       | COVID-19 Genomics UK (COG-UK) Consortium                                          | Ana da Silva Filipe et al                 |
| EPI_ISL_553113 | Lighthouse Lab in Milton Keynes                                                                                                                                                                 | Wellcome Sanger Institute for the COVID-19 Genomics UK (COG-UK) consortium        | The Lighthouse Lab in Alderley Park et al |
| EPI_ISL_535183 | Queens Medical Centre, Clinical Microbiology Department / DeepSeq Nottingham                                                                                                                    | COVID-19 Genomics UK (COG-UK) Consortium                                          | Gemma Clark et al                         |
| EPI_ISL_552145 | Lighthouse Lab in Milton Keynes                                                                                                                                                                 | Wellcome Sanger Institute for the COVID-19 Genomics UK (COG-UK) consortium        | The Lighthouse Lab in Alderley Park et al |
| EPI_ISL_552062 | Lighthouse Lab in Milton Keynes                                                                                                                                                                 | Wellcome Sanger Institute for the COVID-19 Genomics UK (COG-UK) consortium        | The Lighthouse Lab in Alderley Park et al |
| EPI_ISL_552081 | Lighthouse Lab in Milton Keynes                                                                                                                                                                 | Wellcome Sanger Institute for the COVID-19 Genomics UK (COG-UK) consortium        | The Lighthouse Lab in Alderley Park et al |
| EPI_ISL_572874 | Virology Department, Royal Infirmary of Edinburgh, NHS Lothian / School of Biological Sciences, University of Edinburgh / Institute of Genetics and Molecular Medicine, University of Edinburgh | COVID-19 Genomics UK (COG-UK) Consortium                                          | McHugh M et al                            |
| EPI_ISL_560080 | Oxford Viromics, NDM, University of Oxford; Oxford University Hospitals; Basingstoke and North Hampshire Hospital                                                                               | COVID-19 Genomics UK (COG-UK) Consortium                                          | Tanya Golubchik et al                     |
| EPI_ISL_601551 | Lighthouse Lab in Milton Keynes                                                                                                                                                                 | Wellcome Sanger Institute for the COVID-19 Genomics UK (COG-UK) consortium        | The Lighthouse Lab in Milton Keynes et al |
| EPI_ISL_601786 | Lighthouse Lab in Milton Keynes                                                                                                                                                                 | Wellcome Sanger Institute for the COVID-19 Genomics UK (COG-UK) consortium        | The Lighthouse Lab in Milton Keynes et al |
| EPI_ISL_601754 | Lighthouse Lab in Milton Keynes                                                                                                                                                                 | Wellcome Sanger Institute for the COVID-19 Genomics UK (COG-UK) consortium        | The Lighthouse Lab in Milton Keynes et al |
| EPI_ISL_601638 | Lighthouse Lab in Milton Keynes                                                                                                                                                                 | Wellcome Sanger Institute for the COVID-19 Genomics UK (COG-UK) consortium        | The Lighthouse Lab in Milton Keynes et al |
| EPI_ISL_601724 | Lighthouse Lab in Milton Keynes                                                                                                                                                                 | Wellcome Sanger Institute for the COVID-19 Genomics UK (COG-UK) consortium        | The Lighthouse Lab in Milton Keynes et al |
| EPI_ISL_601283 | Lighthouse Lab in Milton Keynes                                                                                                                                                                 | Wellcome Sanger Institute for the COVID-19 Genomics UK (COG-UK) consortium        | The Lighthouse Lab in Milton Keynes et al |
| EPI_ISL_601322 | Lighthouse Lab in Milton Keynes                                                                                                                                                                 | Wellcome Sanger Institute for the COVID-19 Genomics UK (COG-UK) consortium        | The Lighthouse Lab in Milton Keynes et al |
| EPI_ISL_601297 | Lighthouse Lab in Milton Keynes                                                                                                                                                                 | Wellcome Sanger Institute for the COVID-19 Genomics UK (COG-UK) consortium        | The Lighthouse Lab in Milton Keynes et al |



|                |                                                                                                                                                                                  |                                                                            |                                           |
|----------------|----------------------------------------------------------------------------------------------------------------------------------------------------------------------------------|----------------------------------------------------------------------------|-------------------------------------------|
| EPI_ISL_609287 | Lighthouse Lab in Milton Keynes                                                                                                                                                  | Wellcome Sanger Institute for the COVID-19 Genomics UK (COG-UK) consortium | The Lighthouse Lab in Milton Keynes et al |
| EPI_ISL_609291 | Lighthouse Lab in Milton Keynes                                                                                                                                                  | Wellcome Sanger Institute for the COVID-19 Genomics UK (COG-UK) consortium | The Lighthouse Lab in Milton Keynes et al |
| EPI_ISL_609294 | Lighthouse Lab in Milton Keynes                                                                                                                                                  | Wellcome Sanger Institute for the COVID-19 Genomics UK (COG-UK) consortium | The Lighthouse Lab in Milton Keynes et al |
| EPI_ISL_609247 | Lighthouse Lab in Milton Keynes                                                                                                                                                  | Wellcome Sanger Institute for the COVID-19 Genomics UK (COG-UK) consortium | The Lighthouse Lab in Milton Keynes et al |
| EPI_ISL_609226 | Lighthouse Lab in Milton Keynes                                                                                                                                                  | Wellcome Sanger Institute for the COVID-19 Genomics UK (COG-UK) consortium | The Lighthouse Lab in Milton Keynes et al |
| EPI_ISL_609243 | Lighthouse Lab in Milton Keynes                                                                                                                                                  | Wellcome Sanger Institute for the COVID-19 Genomics UK (COG-UK) consortium | The Lighthouse Lab in Milton Keynes et al |
| EPI_ISL_609280 | Lighthouse Lab in Milton Keynes                                                                                                                                                  | Wellcome Sanger Institute for the COVID-19 Genomics UK (COG-UK) consortium | The Lighthouse Lab in Milton Keynes et al |
| EPI_ISL_595144 | Quadram Institute Bioscience                                                                                                                                                     | COVID-19 Genomics UK (COG-UK) Consortium                                   | Dave J. Baker et al                       |
| EPI_ISL_625415 | Lighthouse Lab in Milton Keynes                                                                                                                                                  | Wellcome Sanger Institute for the COVID-19 Genomics UK (COG-UK) consortium | The Lighthouse Lab in Milton Keynes et al |
| EPI_ISL_642942 | Lighthouse Lab in Milton Keynes                                                                                                                                                  | Wellcome Sanger Institute for the COVID-19 Genomics UK (COG-UK) Consortium | The Lighthouse Lab in Milton Keynes et al |
| EPI_ISL_647831 | Lighthouse Lab in Milton Keynes                                                                                                                                                  | Wellcome Sanger Institute for the COVID-19 Genomics UK (COG-UK) Consortium | The Lighthouse Lab in Milton Keynes et al |
| EPI_ISL_650959 | Department of Pathology, University of Cambridge                                                                                                                                 | COVID-19 Genomics UK (COG-UK) Consortium                                   | Aminu S. Jahun et al                      |
| EPI_ISL_651436 | Department of Pathology, University of Cambridge                                                                                                                                 | COVID-19 Genomics UK (COG-UK) Consortium                                   | Aminu S. Jahun et al                      |
| EPI_ISL_651437 | Virology Department, Sheffield Teaching Hospitals NHS Foundation Trust/Department of Infection, Immunity and Cardiovascular Disease, The Medical School, University of Sheffield | COVID-19 Genomics UK (COG-UK) Consortium                                   | Thushan de Silva et al                    |
| EPI_ISL_638090 | Virology Department, Sheffield Teaching Hospitals NHS Foundation Trust/Department of Infection, Immunity and Cardiovascular Disease, The Medical School, University of Sheffield | COVID-19 Genomics UK (COG-UK) Consortium                                   | Thushan de Silva et al                    |
| EPI_ISL_650559 | Quadram Institute Bioscience                                                                                                                                                     | COVID-19 Genomics UK (COG-UK) Consortium                                   | Dave J. Baker et al                       |
| EPI_ISL_650716 | Quadram Institute Bioscience                                                                                                                                                     | COVID-19 Genomics UK (COG-UK) Consortium                                   | Dave J. Baker et al                       |
| EPI_ISL_414486 | Wales Specialist Virology Centre                                                                                                                                                 | Public Health Wales Microbiology Cardiff                                   | Catherine Moore et al                     |
| EPI_ISL_415041 | Wales Specialist Virology Centre                                                                                                                                                 | Public Health Wales Microbiology Cardiff                                   | Catherine Moore et al                     |
| EPI_ISL_414488 | Wales Specialist Virology Centre                                                                                                                                                 | Public Health Wales Microbiology Cardiff                                   | Catherine Moore et al                     |
| EPI_ISL_415435 | Wales Specialist Virology Centre                                                                                                                                                 | Public Health Wales Microbiology Cardiff                                   | Catherine Moore et al                     |
| EPI_ISL_415977 | Wales Specialist Virology Centre                                                                                                                                                 | Public Health Wales Microbiology Cardiff                                   | Catherine Moore et al                     |
| EPI_ISL_415978 | Wales Specialist Virology Centre                                                                                                                                                 | Public Health Wales Microbiology Cardiff                                   | Catherine Moore et al                     |
| EPI_ISL_413555 | Wales Specialist Virology Centre                                                                                                                                                 | Public Health Wales Microbiology Cardiff                                   | Catherine Moore et al                     |
| EPI_ISL_415453 | Wales Specialist Virology Centre                                                                                                                                                 | Public Health Wales Microbiology Cardiff                                   | Catherine Moore et al                     |
| EPI_ISL_415536 | Wales Specialist Virology Centre                                                                                                                                                 | Public Health Wales Microbiology Cardiff                                   | Catherine Moore et al                     |
| EPI_ISL_415991 | Wales Specialist Virology Centre                                                                                                                                                 | Public Health Wales Microbiology Cardiff                                   | Catherine Moore et al                     |
| EPI_ISL_413556 | Wales Specialist Virology Centre                                                                                                                                                 | Public Health Wales Microbiology Cardiff                                   | Catherine Moore et al                     |
| EPI_ISL_416026 | Wales Specialist Virology Centre                                                                                                                                                 | Public Health Wales Microbiology Cardiff                                   | Catherine Moore et al                     |
| EPI_ISL_415916 | Wales Specialist Virology Centre                                                                                                                                                 | Public Health Wales Microbiology Cardiff                                   | Catherine Moore et al                     |
| EPI_ISL_415918 | Wales Specialist Virology Centre                                                                                                                                                 | Public Health Wales Microbiology Cardiff                                   | Catherine Moore et al                     |
| EPI_ISL_415655 | Wales Specialist Virology Centre                                                                                                                                                 | Public Health Wales Microbiology Cardiff                                   | Catherine Moore et al                     |
| EPI_ISL_415659 | Wales Specialist Virology Centre                                                                                                                                                 | Public Health Wales Microbiology Cardiff                                   | Catherine Moore et al                     |
| EPI_ISL_415919 | Wales Specialist Virology Centre                                                                                                                                                 | Public Health Wales Microbiology Cardiff                                   | Catherine Moore et al                     |
| EPI_ISL_415920 | Wales Specialist Virology Centre                                                                                                                                                 | Public Health Wales Microbiology Cardiff                                   | Catherine Moore et al                     |
| EPI_ISL_415656 | Wales Specialist Virology Centre                                                                                                                                                 | Public Health Wales Microbiology Cardiff                                   | Catherine Moore et al                     |
| EPI_ISL_416024 | Wales Specialist Virology Centre                                                                                                                                                 | Public Health Wales Microbiology Cardiff                                   | Catherine Moore et al                     |











































|                |                                                                                                                                         |                                                                                                                                         |                            |
|----------------|-----------------------------------------------------------------------------------------------------------------------------------------|-----------------------------------------------------------------------------------------------------------------------------------------|----------------------------|
| EPI_ISL_647890 | Lighthouse Lab in Glasgow                                                                                                               | Wellcome Sanger Institute for the COVID-19 Genomics UK (COG-UK) Consortium                                                              | Harper VanSteenhouse et al |
| EPI_ISL_647897 | Lighthouse Lab in Glasgow                                                                                                               | Wellcome Sanger Institute for the COVID-19 Genomics UK (COG-UK) Consortium                                                              | Harper VanSteenhouse et al |
| EPI_ISL_647919 | Lighthouse Lab in Glasgow                                                                                                               | Wellcome Sanger Institute for the COVID-19 Genomics UK (COG-UK) Consortium                                                              | Harper VanSteenhouse et al |
| EPI_ISL_647904 | Lighthouse Lab in Glasgow                                                                                                               | Wellcome Sanger Institute for the COVID-19 Genomics UK (COG-UK) Consortium                                                              | Harper VanSteenhouse et al |
| EPI_ISL_413691 | Weifang Center for Disease Control and Prevention                                                                                       | Weifang Center for Disease Control and Prevention & BGI-Shenzhen                                                                        | Qing Nie et al             |
| EPI_ISL_413692 | Weifang Center for Disease Control and Prevention                                                                                       | Weifang Center for Disease Control and Prevention & BGI-Shenzhen                                                                        | Qing Nie et al             |
| EPI_ISL_413693 | Weifang Center for Disease Control and Prevention                                                                                       | Weifang Center for Disease Control and Prevention & BGI-Shenzhen                                                                        | Qing Nie et al             |
| EPI_ISL_413694 | Weifang Center for Disease Control and Prevention                                                                                       | Weifang Center for Disease Control and Prevention & BGI-Shenzhen                                                                        | Qing Nie et al             |
| EPI_ISL_413697 | Weifang Center for Disease Control and Prevention                                                                                       | Weifang Center for Disease Control and Prevention & BGI-Shenzhen                                                                        | Qing Nie et al             |
| EPI_ISL_413711 | Weifang Center for Disease Control and Prevention                                                                                       | Weifang Center for Disease Control and Prevention & BGI-Shenzhen                                                                        | Qing Nie et al             |
| EPI_ISL_413729 | Weifang Center for Disease Control and Prevention                                                                                       | Weifang Center for Disease Control and Prevention & BGI-Shenzhen                                                                        | Qing Nie et al             |
| EPI_ISL_413746 | Weifang Center for Disease Control and Prevention                                                                                       | Weifang Center for Disease Control and Prevention & BGI-Shenzhen                                                                        | Qing Nie et al             |
| EPI_ISL_413748 | Weifang Center for Disease Control and Prevention                                                                                       | Weifang Center for Disease Control and Prevention & BGI-Shenzhen                                                                        | Qing Nie et al             |
| EPI_ISL_413749 | Weifang Center for Disease Control and Prevention                                                                                       | Weifang Center for Disease Control and Prevention & BGI-Shenzhen                                                                        | Qing Nie et al             |
| EPI_ISL_413750 | Weifang Center for Disease Control and Prevention                                                                                       | Weifang Center for Disease Control and Prevention & BGI-Shenzhen                                                                        | Qing Nie et al             |
| EPI_ISL_413751 | Weifang Center for Disease Control and Prevention                                                                                       | Weifang Center for Disease Control and Prevention & BGI-Shenzhen                                                                        | Qing Nie et al             |
| EPI_ISL_413753 | Weifang Center for Disease Control and Prevention                                                                                       | Weifang Center for Disease Control and Prevention & BGI-Shenzhen                                                                        | Qing Nie et al             |
| EPI_ISL_413761 | Weifang Center for Disease Control and Prevention                                                                                       | Weifang Center for Disease Control and Prevention & BGI-Shenzhen                                                                        | Qing Nie et al             |
| EPI_ISL_413791 | Weifang Center for Disease Control and Prevention                                                                                       | Weifang Center for Disease Control and Prevention & BGI-Shenzhen                                                                        | Qing Nie et al             |
| EPI_ISL_413809 | Weifang Center for Disease Control and Prevention                                                                                       | Weifang Center for Disease Control and Prevention & BGI-Shenzhen                                                                        | Qing Nie et al             |
| EPI_ISL_402132 | Wuhan Jinyintan Hospital                                                                                                                | Hubei Provincial Center for Disease Control and Prevention                                                                              | Bin Fang et al             |
| EPI_ISL_412898 | Wuhan Jinyintan Hospital                                                                                                                | Hubei Provincial Center for Disease Control and Prevention                                                                              | Bin Fang et al             |
| EPI_ISL_412978 | The Central Hospital Of Wuhan                                                                                                           | Hubei Provincial Center for Disease Control and Prevention                                                                              | Bin Fang et al             |
| EPI_ISL_412979 | Union Hospital of Tongji Medical College, Huazhong University of Science and Technology                                                 | Hubei Provincial Center for Disease Control and Prevention                                                                              | Bin Fang et al             |
| EPI_ISL_412980 | Union Hospital of Tongji Medical College, Huazhong University of Science and Technology                                                 | Hubei Provincial Center for Disease Control and Prevention                                                                              | Bin Fang et al             |
| EPI_ISL_412981 | CR&WISCO GENERAL HOSPITAL                                                                                                               | Hubei Provincial Center for Disease Control and Prevention                                                                              | Bin Fang et al             |
| EPI_ISL_412982 | Wuhan Lung Hospital                                                                                                                     | Hubei Provincial Center for Disease Control and Prevention                                                                              | Bin Fang et al             |
| EPI_ISL_402125 | National Institute for Communicable Disease Control and Prevention (ICDC) Chinese Center for Disease Control and Prevention (China CDC) | National Institute for Communicable Disease Control and Prevention (ICDC) Chinese Center for Disease Control and Prevention (China CDC) | Zhang et al                |
| EPI_ISL_402123 | Institute of Pathogen Biology, Chinese Academy of Medical Sciences & Peking Union Medical College                                       | Institute of Pathogen Biology, Chinese Academy of Medical Sciences & Peking Union Medical College                                       | Lili Ren et al             |
| EPI_ISL_403931 | Institute of Pathogen Biology, Chinese Academy of Medical Sciences & Peking Union Medical College                                       | Institute of Pathogen Biology, Chinese Academy of Medical Sciences & Peking Union Medical College                                       | Lili Ren et al             |
| EPI_ISL_403930 | Institute of Pathogen Biology, Chinese Academy of Medical Sciences & Peking Union Medical College                                       | Institute of Pathogen Biology, Chinese Academy of Medical Sciences & Peking Union Medical College                                       | Lili Ren et al             |
| EPI_ISL_403929 | Institute of Pathogen Biology, Chinese Academy of Medical Sciences & Peking Union Medical College                                       | Institute of Pathogen Biology, Chinese Academy of Medical Sciences & Peking Union Medical College                                       | Lili Ren et al             |



|                |                                                                                                                |                                                                                                                                                                                                                            |                                         |
|----------------|----------------------------------------------------------------------------------------------------------------|----------------------------------------------------------------------------------------------------------------------------------------------------------------------------------------------------------------------------|-----------------------------------------|
| EPI_ISL_403928 | Institute of Pathogen Biology, Chinese Academy of Medical Sciences & Peking Union Medical College              | Institute of Pathogen Biology, Chinese Academy of Medical Sciences & Peking Union Medical College                                                                                                                          | Lili Ren et al                          |
| EPI_ISL_402120 | National Institute for Viral Disease Control and Prevention, China CDC                                         | National Institute for Viral Disease Control and Prevention, China CDC                                                                                                                                                     | Wenjie Tan et al                        |
| EPI_ISL_402121 | National Institute for Viral Disease Control and Prevention, China CDC                                         | National Institute for Viral Disease Control and Prevention, China CDC                                                                                                                                                     | Wenjie Tan et al                        |
| EPI_ISL_406798 | General Hospital of Central Theater Command of People's Liberation Army of China                               | BGI & Institute of Microbiology, Chinese Academy of Sciences & Shandong First Medical University & Shandong Academy of Medical Sciences & General Hospital of Central Theater Command of People's Liberation Army of China | Weijun Chen et al                       |
| EPI_ISL_406800 | General Hospital of Central Theater Command of People's Liberation Army of China                               | BGI & Institute of Microbiology, Chinese Academy of Sciences & Shandong First Medical University & Shandong Academy of Medical Sciences & General Hospital of Central Theater Command of People's Liberation Army of China | Weijun Chen et al                       |
| EPI_ISL_406801 | General Hospital of Central Theater Command of People's Liberation Army of China                               | BGI & Institute of Microbiology, Chinese Academy of Sciences & Shandong First Medical University & Shandong Academy of Medical Sciences & General Hospital of Central Theater Command of People's Liberation Army of China | Weijun Chen et al                       |
| EPI_ISL_406716 | State Key Laboratory of Virology, Wuhan University                                                             | State Key Laboratory of Virology, Wuhan University                                                                                                                                                                         | Chen et al                              |
| EPI_ISL_406717 | State Key Laboratory of Virology, Wuhan University                                                             | State Key Laboratory of Virology, Wuhan University                                                                                                                                                                         | Chen et al                              |
| EPI_ISL_402127 | Wuhan Jinyintan Hospital                                                                                       | Wuhan Institute of Virology, Chinese Academy of Sciences                                                                                                                                                                   | Peng Zhou et al                         |
| EPI_ISL_402124 | Wuhan Jinyintan Hospital                                                                                       | Wuhan Institute of Virology, Chinese Academy of Sciences                                                                                                                                                                   | Peng Zhou et al                         |
| EPI_ISL_402128 | Wuhan Jinyintan Hospital                                                                                       | Wuhan Institute of Virology, Chinese Academy of Sciences                                                                                                                                                                   | Peng Zhou et al                         |
| EPI_ISL_402129 | Wuhan Jinyintan Hospital                                                                                       | Wuhan Institute of Virology, Chinese Academy of Sciences                                                                                                                                                                   | Peng Zhou et al                         |
| EPI_ISL_402130 | Wuhan Jinyintan Hospital                                                                                       | Wuhan Institute of Virology, Chinese Academy of Sciences                                                                                                                                                                   | Peng Zhou et al                         |
| EPI_ISL_408480 | National Institute for Viral Disease Control and Prevention, China CDC                                         | National Institute for Viral Disease Control & Prevention, CCDC                                                                                                                                                            | Wenjie Tan et al                        |
| EPI_ISL_404227 | Zhejiang Provincial Center for Disease Control and Prevention                                                  | Department of Microbiology, Zhejiang Provincial Center for Disease Control and Prevention                                                                                                                                  | Yin Chen et al                          |
| EPI_ISL_404228 | Zhejiang Provincial Center for Disease Control and Prevention                                                  | Department of Microbiology, Zhejiang Provincial Center for Disease Control and Prevention                                                                                                                                  | Yanjun Zhang et al                      |
| EPI_ISL_487275 | Department of Veterinary Pathology, University of Liege - FARA                                                 | Department of Veterinary Pathology, University of Liege - FARA                                                                                                                                                             | Garigliany et al                        |
| EPI_ISL_683164 | Department of Virus and Microbiological Special Diagnostics, Statens Serum Institut, Copenhagen, Denmark       | Albertsen Lab, Department of Chemistry and Bioscience, Aalborg University, Denmark                                                                                                                                         | Danish Covid-19 Genome Consortium et al |
| EPI_ISL_683165 | Department of Virus and Microbiological Special Diagnostics, Statens Serum Institut, Copenhagen, Denmark       | Albertsen Lab, Department of Chemistry and Bioscience, Aalborg University, Denmark                                                                                                                                         | Danish Covid-19 Genome Consortium et al |
| EPI_ISL_683166 | Department of Virus and Microbiological Special Diagnostics, Statens Serum Institut, Copenhagen, Denmark       | Albertsen Lab, Department of Chemistry and Bioscience, Aalborg University, Denmark                                                                                                                                         | Danish Covid-19 Genome Consortium et al |
| EPI_ISL_536400 | Fareham Creek Veterinary Surgery                                                                               | MRC-University of Glasgow Centre for Virus Research                                                                                                                                                                        | Margaret J Hosie et al                  |
| EPI_ISL_483063 | unknown                                                                                                        | Virology, Ecole Nationale Veterinaire de Toulouse                                                                                                                                                                          | Bessiere et al                          |
| EPI_ISL_483064 | unknown                                                                                                        | Virology, Ecole Nationale Veterinaire de Toulouse                                                                                                                                                                          | Bessiere et al                          |
| EPI_ISL_437349 | Ecole nationale vétérinaire d'Alfort-laboratoire de santé animale Anses UMR 1161 de virologie ENVA-Anses-INRAE | Institut Pasteur CIBU-ERI                                                                                                                                                                                                  | Sophie Le Poder et al                   |
| EPI_ISL_482820 | Centre de Recerca en Sanitat Animal (IRTA-CReSA)                                                               | IrsiCaixa AIDS Research Lab                                                                                                                                                                                                | J. Segalés et al                        |
| EPI_ISL_699506 | Diagnostic Virology Laboratory, USDA National Veterinary Services Laboratories                                 | Diagnostic Virology Laboratory, USDA National Veterinary Services Laboratories                                                                                                                                             | Hamer et al                             |
| EPI_ISL_699507 | Diagnostic Virology Laboratory, USDA National Veterinary Services Laboratories                                 | Diagnostic Virology Laboratory, USDA National Veterinary Services Laboratories                                                                                                                                             | Hamer et al                             |
| EPI_ISL_699509 | Diagnostic Virology Laboratory, USDA National Veterinary Services Laboratories                                 | Diagnostic Virology Laboratory, USDA National Veterinary Services Laboratories                                                                                                                                             | Hamer et al                             |
| EPI_ISL_450403 | School of Public Health, The University of Hong Kong                                                           | School of Public Health, The University of Hong Kong                                                                                                                                                                       | Sit et al                               |
| EPI_ISL_699508 | Diagnostic Virology Laboratory, USDA National Veterinary Services Laboratories                                 | Diagnostic Virology Laboratory, USDA National Veterinary Services Laboratories                                                                                                                                             | Hamer et al                             |
| EPI_ISL_566038 | Wildlife Conservation Society, Bronx Zoo                                                                       | Diagnostic Virology Laboratory, United States Department of Agriculture, National Veterinary Services Laboratories, Population Medicine and Diagnostic Sciences, Cornell University                                        | McAloose et al                          |
| EPI_ISL_566036 | Wildlife Conservation Society, Bronx Zoo                                                                       | Diagnostic Virology Laboratory, United States Department of Agriculture, National Veterinary Services Laboratories, Population Medicine and Diagnostic Sciences, Cornell University                                        | McAloose et al                          |















































|                |                                                                                             |                                                                                                                                                                                     |                                                                                                                                                                      |
|----------------|---------------------------------------------------------------------------------------------|-------------------------------------------------------------------------------------------------------------------------------------------------------------------------------------|----------------------------------------------------------------------------------------------------------------------------------------------------------------------|
| EPI_ISL_447627 | Virology, Wageningen Bioveterinary Research                                                 | Virology, Wageningen Bioveterinary Research                                                                                                                                         | van der Poel et al                                                                                                                                                   |
| EPI_ISL_447628 | Virology, Wageningen Bioveterinary Research                                                 | Virology, Wageningen Bioveterinary Research                                                                                                                                         | van der Poel et al                                                                                                                                                   |
| EPI_ISL_447629 | Virology, Wageningen Bioveterinary Research                                                 | Virology, Wageningen Bioveterinary Research                                                                                                                                         | van der Poel et al                                                                                                                                                   |
| EPI_ISL_447630 | Virology, Wageningen Bioveterinary Research                                                 | Virology, Wageningen Bioveterinary Research                                                                                                                                         | van der Poel et al                                                                                                                                                   |
| EPI_ISL_447632 | Virology, Wageningen Bioveterinary Research                                                 | Virology, Wageningen Bioveterinary Research                                                                                                                                         | Oreshkova et al                                                                                                                                                      |
| EPI_ISL_447631 | Virology, Wageningen Bioveterinary Research                                                 | Virology, Wageningen Bioveterinary Research                                                                                                                                         | Oreshkova et al                                                                                                                                                      |
| EPI_ISL_447633 | Virology, Wageningen Bioveterinary Research                                                 | Virology, Wageningen Bioveterinary Research                                                                                                                                         | Oreshkova et al                                                                                                                                                      |
| EPI_ISL_447634 | Virology, Wageningen Bioveterinary Research                                                 | Virology, Wageningen Bioveterinary Research                                                                                                                                         | Oreshkova et al                                                                                                                                                      |
| EPI_ISL_459910 | Zoonotic and Exotic infection Diseases Division, Harbin Veterinary Research Institute, CAAS | Zoonotic and Exotic infection Diseases Division, Harbin Veterinary Resrarch Institute, CAAS                                                                                         | Jinliang Wang et al                                                                                                                                                  |
| EPI_ISL_420293 | Wildlife Conservation Society, Bronx Zoo                                                    | Diagnostic Virology Laboratory, United States Department of Agriculture, National Veterinary Services Laboratories                                                                  | Patrick K. Mitchell et al                                                                                                                                            |
| EPI_ISL_566039 | Wildlife Conservation Society, Bronx Zoo                                                    | Diagnostic Virology Laboratory, United States Department of Agriculture, National Veterinary Services Laboratories, Population Medicine and Diagnostic Sciences, Cornell University | McAloose et al                                                                                                                                                       |
| EPI_ISL_566041 | Wildlife Conservation Society, Bronx Zoo                                                    | Diagnostic Virology Laboratory, United States Department of Agriculture, National Veterinary Services Laboratories, Population Medicine and Diagnostic Sciences, Cornell University | McAloose et al                                                                                                                                                       |
| EPI_ISL_566042 | Wildlife Conservation Society, Bronx Zoo                                                    | Diagnostic Virology Laboratory, United States Department of Agriculture, National Veterinary Services Laboratories, Population Medicine and Diagnostic Sciences, Cornell University | McAloose et al                                                                                                                                                       |
| EPI_ISL_566040 | Wildlife Conservation Society, Bronx Zoo                                                    | Diagnostic Virology Laboratory, United States Department of Agriculture, National Veterinary Services Laboratories, Population Medicine and Diagnostic Sciences, Cornell University | McAloose et al                                                                                                                                                       |
| EPI_ISL_566043 | Wildlife Conservation Society, Bronx Zoo                                                    | Diagnostic Virology Laboratory, United States Department of Agriculture, National Veterinary Services Laboratories, Population Medicine and Diagnostic Sciences, Cornell University | McAloose et al                                                                                                                                                       |
| EPI_ISL_415692 | unknown                                                                                     | National Reference Center for Viruses of Respiratory Infections, Institut Pasteur, Paris                                                                                            | Mélnie Albert, Marion Barbet, Sylvie Behillil, Méline Bizard, Angela Brisebarre, Flora Donati Vincent Enouf, Maud Vanpeene, Sylvie van der Werf                      |
| EPI_ISL_415697 | Centre Hospitalier Compiègne Laboratoire de Biologie                                        | National Reference Center for Viruses of Respiratory Infections, Institut Pasteur, Paris                                                                                            | Mélnie Albert, Marion Barbet, Sylvie Behillil, Méline Bizard, Angela Brisebarre, Flora Donati Vincent Enouf, Maud Vanpeene, Sylvie van der Werf, Raulin Olivia       |
| EPI_ISL_415540 | Utah Public Health Laboratory                                                               | Utah Public Health Laboratory                                                                                                                                                       | Erin Young, Kelly Oakeson                                                                                                                                            |
| EPI_ISL_415696 | Centre Hospitalier Compiègne Laboratoire de Biologie                                        | National Reference Center for Viruses of Respiratory Infections, Institut Pasteur, Paris                                                                                            | Mélnie Albert, Marion Barbet, Sylvie Behillil, Méline Bizard, Angela Brisebarre, Flora Donati Vincent Enouf, Maud Vanpeene, Sylvie van der Werf, Raulin Olivia       |
| EPI_ISL_415695 | unknown                                                                                     | National Reference Center for Viruses of Respiratory Infections, Institut Pasteur, Paris                                                                                            | Mélnie Albert, Marion Barbet, Sylvie Behillil, Méline Bizard, Angela Brisebarre, Flora Donati Vincent Enouf, Maud Vanpeene, Sylvie van der Werf                      |
| EPI_ISL_415694 | unknown                                                                                     | National Reference Center for Viruses of Respiratory Infections, Institut Pasteur, Paris                                                                                            | Mélnie Albert, Marion Barbet, Sylvie Behillil, Méline Bizard, Angela Brisebarre, Flora Donati Vincent Enouf, Maud Vanpeene, Sylvie van der Werf                      |
| EPI_ISL_415693 | Hôpital Instruction des Armées - BEGIN                                                      | National Reference Center for Viruses of Respiratory Infections, Institut Pasteur, Paris                                                                                            | Mélnie Albert, Marion Barbet, Sylvie Behillil, Méline Bizard, Angela Brisebarre, Flora Donati Vincent Enouf, Maud Vanpeene, Sylvie van der Werf, Christine Bigaillon |

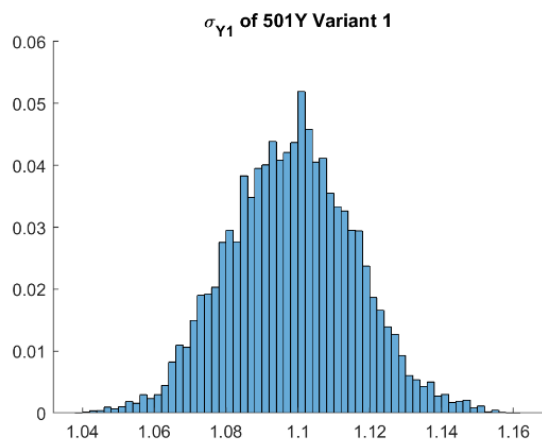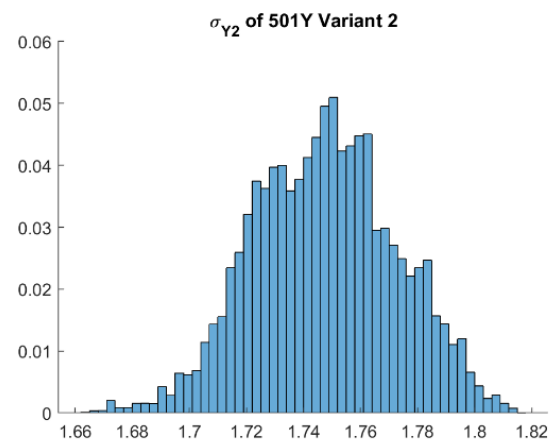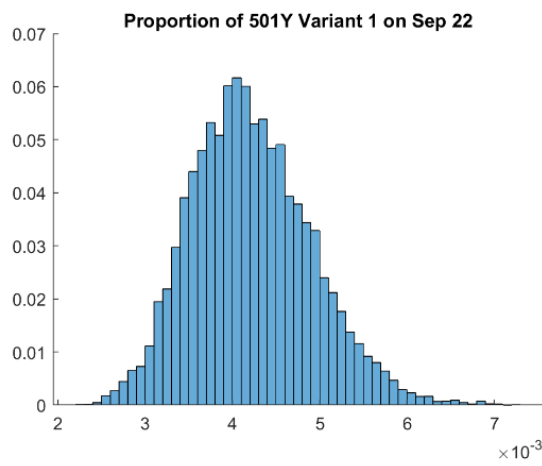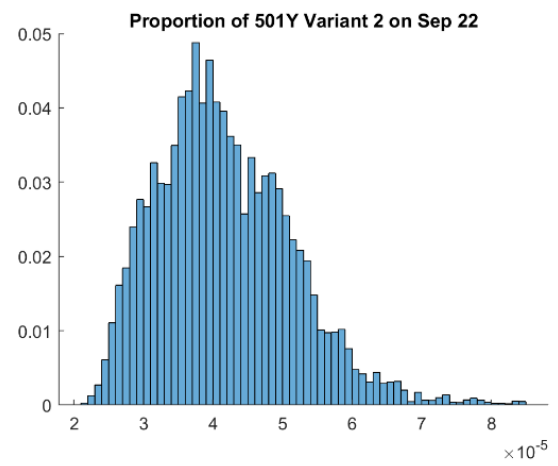

**Figure S1. The posterior distribution of model parameters**



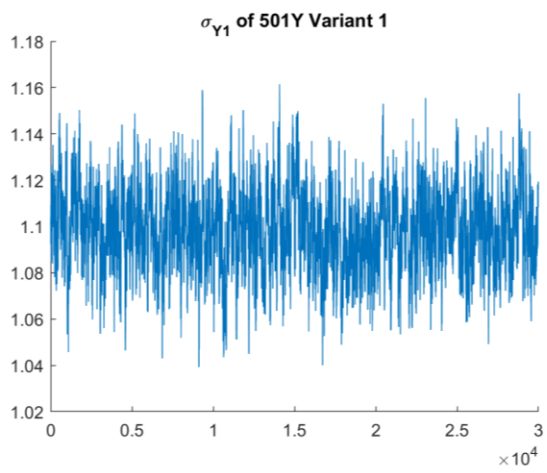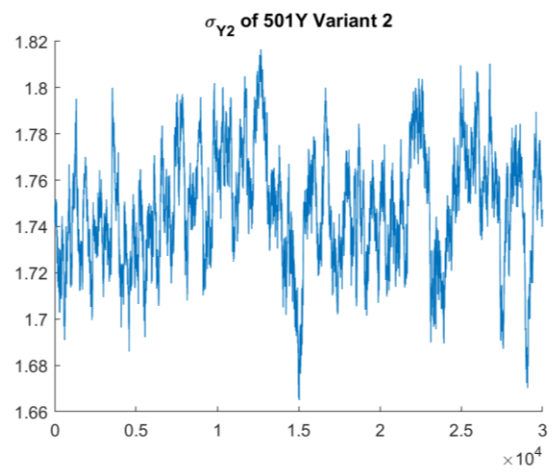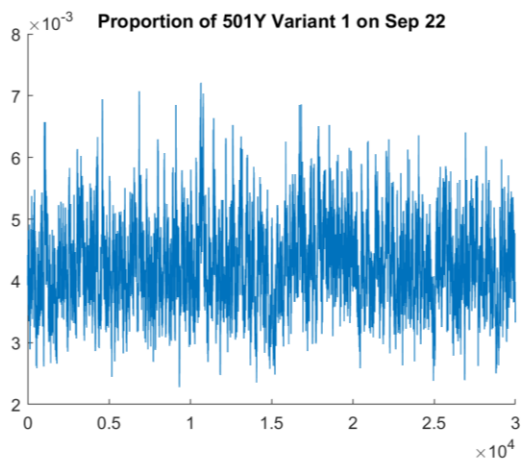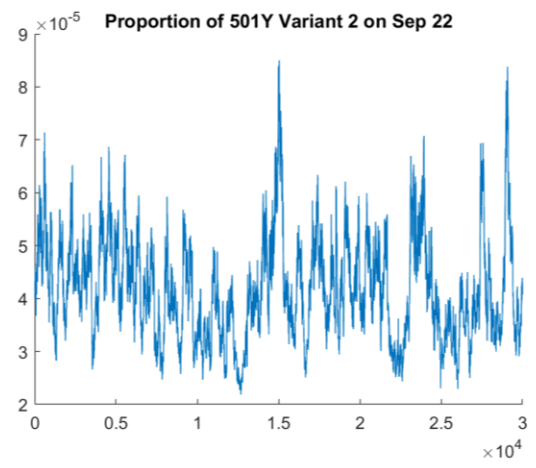

**Figure S2. The MCMC trace plots of model parameter**
